# Supplementary material for: Effects of Hypoxia on RNA Cargo in Extracellular Vesicles from Human Adipose-Derived Stromal/Stem Cells
Source: MDPI journal article supplement (doi:10.3390/ijms23137384), 2022-07-02
Supplement: s1 [file s1]

**Table S3. List of all 190 miRs detected in nEVs and hEVs.**

| <b>ID</b>                       | <b>log2FC (hEVs/nEVs)</b> | <b>padj (hEVs/nEVs)</b> |
|---------------------------------|---------------------------|-------------------------|
| HSA_PIR_020009/GB/DQ597484/HOMO | 4,47                      | NA                      |
| HSA_PIR_019914/GB/DQ597347/HOMO | 4,27                      | 4,88E-10                |
| HSA_PIR_013624/GB/DQ588594/HOMO | 4,15                      | 1,27E-06                |
| HSA_PIR_020829/GB/DQ598677/HOMO | 3,99                      | 3,12E-15                |
| HSA_PIR_018570/GB/DQ595536/HOMO | 3,83                      | 4,41E-07                |
| HSA_PIR_020541/GB/DQ598252/HOMO | 3,62                      | 0,003228131             |
| HSA_PIR_001312/GB/DQ571813/HOMO | 3,58                      | 2,18E-06                |
| HSA-MIR-542-3P                  | 2,91                      | NA                      |
| HSA_PIR_014923/GB/DQ590404/HOMO | 2,78                      | 0,00953244              |
| HSA-MIR-193A-5P                 | 2,65                      | NA                      |
| HSA_PIR_004153/GB/DQ575660/HOMO | 2,58                      | 0,00953244              |
| HSA_PIR_015026/GB/DQ590548/HOMO | 2,49                      | 0,168150406             |
| HSA_PIR_020496/GB/DQ598175/HOMO | 2,04                      | 0,3315956               |
| HSA_PIR_016659/GB/DQ592932/HOMO | 1,89                      | 0,274316118             |
| HSA_PIR_017716/GB/DQ594453/HOMO | 1,84                      | 0,168150406             |
| HSA-MIR-31-3P                   | 1,83                      | NA                      |
| HSA_PIR_016658/GB/DQ592931/HOMO | 1,83                      | 0,018534657             |
| HSA-MIR-339-5P                  | 1,77                      | 0,3315956               |
| HSA_PIR_020497/GB/DQ598177/HOMO | 1,74                      | 0,288395213             |
| HSA_PIR_001170/GB/DQ571526/HOMO | 1,67                      | NA                      |
| HSA-MIR-34C-5P                  | 1,67                      | NA                      |
| HSA-MIR-671-5P                  | 1,67                      | NA                      |
| HSA_PIR_020326/GB/DQ597916/HOMO | 1,48                      | 0,054099274             |
| HSA-MIR-181A-5P                 | 1,43                      | NA                      |
| HSA_PIR_000765/GB/DQ570956/HOMO | 1,35                      | 0,016437122             |
| HSA-MIR-510-3P                  | 1,31                      | NA                      |
| HSA-MIR-218-5P                  | 1,20                      | 0,567542541             |
| HSA-MIR-185-5P                  | 1,09                      | NA                      |
| HSA-MIR-487B-3P                 | 1,08                      | NA                      |
| HSA-MIR-299-5P                  | 0,95                      | NA                      |
| HSA-MIR-486-5P                  | 0,95                      | 0,73191585              |
| HSA-MIR-122-5P                  | 0,93                      | 0,567542541             |
| HSA-MIR-423-5P                  | 0,90                      | 0,73191585              |
| HSA-MIR-493-5P                  | 0,89                      | NA                      |
| HSA-MIR-140-5P                  | 0,87                      | 0,833107664             |
| HSA-MIR-423-3P                  | 0,82                      | NA                      |
| HSA-MIR-376C-3P                 | 0,82                      | NA                      |
| HSA-MIR-29A-3P                  | 0,80                      | 0,3315956               |
| HSA-MIR-125B-1-3P               | 0,78                      | 0,73191585              |
| HSA-MIR-99A-5P                  | 0,76                      | 0,833792261             |
| HSA-MIR-503-5P                  | 0,72                      | NA                      |
| HSA-MIR-432-5P                  | 0,70                      | 0,791355633             |
| HSA-MIR-323A-3P                 | 0,66                      | NA                      |
| HSA-MIR-145-5P                  | 0,64                      | 0,841018228             |
| HSA-MIR-103B                    | 0,63                      | NA                      |
| HSA-MIR-493-3P                  | 0,63                      | NA                      |

|                 |       |             |
|-----------------|-------|-------------|
| HSA-MIR-134-5P  | 0,62  | 0,861030031 |
| HSA-MIR-532-5P  | 0,60  | NA          |
| HSA-MIR-106B-3P | 0,57  | NA          |
| HSA-MIR-196B-5P | 0,55  | 0,833107664 |
| HSA-MIR-221-3P  | 0,54  | 0,734337669 |
| HSA-MIR-574-5P  | 0,51  | NA          |
| HSA-MIR-6779-5P | 0,44  | NA          |
| HSA-MIR-28-3P   | 0,41  | 0,910696502 |
| HSA-MIR-30D-5P  | 0,39  | 0,848508529 |
| HSA-MIR-136-5P  | 0,39  | 0,910696502 |
| HSA-MIR-25-3P   | 0,39  | 0,867715534 |
| HSA-MIR-6865-5P | 0,38  | NA          |
| HSA-MIR-34A-5P  | 0,36  | 0,867715534 |
| HSA-MIR-7-5P    | 0,36  | NA          |
| HSA-MIR-146B-5P | 0,34  | NA          |
| HSA-MIR-24-3P   | 0,34  | 0,861030031 |
| HSA-MIR-10A-3P  | 0,31  | NA          |
| HSA-MIR-379-5P  | 0,26  | NA          |
| HSA-MIR-425-5P  | 0,24  | NA          |
| HSA-MIR-127-3P  | 0,24  | 0,910696502 |
| HSA-MIR-155-5P  | 0,22  | 0,912065894 |
| HSA-MIR-137     | 0,22  | NA          |
| HSA-MIR-140-3P  | 0,22  | 0,912065894 |
| HSA-MIR-151A-3P | 0,21  | 0,910696502 |
| HSA-MIR-6789-5P | 0,21  | 0,910696502 |
| HSA-MIR-100-5P  | 0,21  | 0,910696502 |
| HSA-MIR-152-3P  | 0,20  | 0,910696502 |
| HSA-MIR-4784    | 0,15  | NA          |
| HSA-MIR-31-5P   | 0,12  | 0,952402237 |
| HSA-MIR-424-5P  | 0,10  | NA          |
| HSA-MIR-340-5P  | 0,08  | NA          |
| HSA-MIR-20A-5P  | 0,06  | NA          |
| HSA-LET-7D-5P   | 0,06  | 0,964075407 |
| HSA-MIR-138-5P  | 0,06  | NA          |
| HSA-MIR-361-3P  | 0,03  | NA          |
| HSA-MIR-494-3P  | 0,02  | NA          |
| HSA-MIR-450B-5P | -0,02 | NA          |
| HSA-MIR-497-5P  | -0,03 | NA          |
| HSA-MIR-126-3P  | -0,07 | NA          |
| HSA-MIR-224-5P  | -0,07 | 0,952402237 |
| HSA-MIR-30C-5P  | -0,09 | 0,952402237 |
| HSA-MIR-30A-3P  | -0,10 | NA          |
| HSA-MIR-342-3P  | -0,11 | 0,952402237 |
| HSA-MIR-6781-3P | -0,12 | NA          |
| HSA-MIR-29C-3P  | -0,12 | 0,952402237 |
| HSA-MIR-195-5P  | -0,13 | NA          |
| HSA-MIR-98-5P   | -0,19 | 0,9415499   |
| HSA-MIR-148A-3P | -0,19 | 0,910696502 |
| HSA-MIR-214-3P  | -0,23 | 0,941261558 |

|                                 |       |             |
|---------------------------------|-------|-------------|
| HSA-MIR-431-5P                  | -0,24 | NA          |
| HSA-MIR-382-5P                  | -0,24 | 0,910696502 |
| HSA-MIR-148B-3P                 | -0,24 | NA          |
| HSA-MIR-381-3P                  | -0,27 | 0,910696502 |
| HSA-MIR-92B-3P                  | -0,28 | NA          |
| HSA-MIR-369-3P                  | -0,28 | NA          |
| HSA-MIR-22-3P                   | -0,30 | 0,910696502 |
| HSA-MIR-337-5P                  | -0,31 | NA          |
| HSA-MIR-196A-5P                 | -0,31 | 0,952402237 |
| HSA-MIR-23A-3P                  | -0,33 | 0,861030031 |
| HSA-MIR-574-3P                  | -0,35 | 0,910696502 |
| HSA-MIR-191-5P                  | -0,35 | 0,864081516 |
| HSA-LET-7G-5P                   | -0,37 | 0,853643649 |
| HSA-LET-7B-5P                   | -0,38 | 0,734337669 |
| HSA-MIR-27A-3P                  | -0,44 | 0,833107664 |
| HSA-MIR-361-5P                  | -0,46 | 0,910696502 |
| HSA-MIR-92A-3P                  | -0,46 | 0,853643649 |
| HSA-MIR-4440                    | -0,47 | 0,910696502 |
| HSA-MIR-186-5P                  | -0,48 | 0,853643649 |
| HSA-MIR-16-2-3P                 | -0,50 | NA          |
| HSA-MIR-452-5P                  | -0,50 | NA          |
| HSA-MIR-10A-5P                  | -0,51 | 0,833107664 |
| HSA-MIR-199B-3P                 | -0,54 | 0,734337669 |
| HSA-MIR-128-3P                  | -0,55 | NA          |
| HSA-MIR-22-5P                   | -0,55 | NA          |
| HSA-LET-7C-5P                   | -0,56 | 0,582085167 |
| HSA-MIR-197-3P                  | -0,57 | 0,867715534 |
| HSA_PIR_008114/GB/DQ581033/HOMO | -0,57 | 0,853643649 |
| HSA-MIR-409-3P                  | -0,66 | 0,853643649 |
| HSA-MIR-103A-3P                 | -0,67 | 0,833107664 |
| HSA-MIR-615-3P                  | -0,67 | NA          |
| HSA-MIR-222-3P                  | -0,69 | 0,734337669 |
| HSA-MIR-3135B                   | -0,73 | NA          |
| HSA-MIR-27B-3P                  | -0,76 | 0,567542541 |
| HSA-MIR-1307-3P                 | -0,79 | NA          |
| HSA-MIR-199A-3P                 | -0,81 | 0,281990907 |
| HSA-MIR-370-3P                  | -0,83 | NA          |
| HSA-MIR-143-3P                  | -0,83 | 0,32452441  |
| HSA-MIR-335-3P                  | -0,85 | NA          |
| HSA-MIR-30A-5P                  | -0,86 | 0,499049902 |
| HSA-MIR-4532                    | -0,86 | NA          |
| HSA-MIR-454-3P                  | -0,90 | NA          |
| HSA-MIR-30E-5P                  | -0,92 | 0,73191585  |
| HSA-MIR-199B-5P                 | -0,99 | 0,567542541 |
| HSA-MIR-21-5P                   | -1,01 | 0,168150406 |
| HSA-MIR-374B-5P                 | -1,02 | NA          |
| HSA-MIR-99B-5P                  | -1,02 | 0,567542541 |
| HSA-MIR-130A-3P                 | -1,04 | NA          |
| HSA-MIR-320A                    | -1,07 | 0,734337669 |

|                                 |       |             |
|---------------------------------|-------|-------------|
| HSA-MIR-16-5P                   | -1,07 | 0,199922617 |
| HSA_PIR_008113/GB/DQ581032/HOMO | -1,07 | 0,380127572 |
| HSA-LET-7A-3P                   | -1,08 | NA          |
| HSA-MIR-4324                    | -1,11 | NA          |
| HSA-MIR-369-5P                  | -1,12 | NA          |
| HSA-MIR-199A-5P                 | -1,13 | 0,346900241 |
| HSA-MIR-181B-5P                 | -1,16 | NA          |
| HSA-MIR-411-5P                  | -1,19 | NA          |
| HSA-MIR-132-3P                  | -1,21 | NA          |
| HSA-MIR-26B-5P                  | -1,22 | 0,274316118 |
| HSA-MIR-125B-5P                 | -1,27 | 0,040712116 |
| HSA-MIR-93-5P                   | -1,30 | 0,567542541 |
| HSA-MIR-221-5P                  | -1,31 | NA          |
| HSA_PIR_008112/GB/DQ581031/HOMO | -1,35 | 0,281990907 |
| HSA-LET-7I-5P                   | -1,37 | 0,098197562 |
| HSA-MIR-26A-5P                  | -1,40 | 0,065147217 |
| HSA-MIR-29B-3P                  | -1,55 | 0,168150406 |
| HSA-MIR-23B-3P                  | -1,55 | 0,511141585 |
| HSA-MIR-10B-5P                  | -1,55 | 0,337162085 |
| HSA-LET-7A-5P                   | -1,55 | 0,031265758 |
| HSA-MIR-660-5P                  | -1,63 | NA          |
| HSA-MIR-654-3P                  | -1,72 | 0,567542541 |
| HSA-MIR-30E-3P                  | -1,76 | NA          |
| HSA-MIR-30B-5P                  | -1,78 | NA          |
| HSA-MIR-125A-5P                 | -1,80 | 0,014819011 |
| HSA-MIR-143-5P                  | -1,81 | NA          |
| HSA-MIR-1307-5P                 | -1,85 | NA          |
| HSA-MIR-365A-3P                 | -1,87 | NA          |
| HSA-LET-7F-5P                   | -1,92 | 0,010317864 |
| HSA-MIR-154-5P                  | -1,96 | NA          |
| HSA-MIR-365B-3P                 | -1,98 | NA          |
| HSA-MIR-151B/151A-5P            | -1,99 | NA          |
| HSA-MIR-376A-3P                 | -2,22 | NA          |
| HSA-MIR-15A-5P                  | -2,25 | NA          |
| HSA-MIR-335-5P                  | -2,26 | 0,3315956   |
| HSA-MIR-101-3P                  | -2,27 | 0,246561771 |
| HSA-MIR-19B-3P                  | -2,34 | NA          |
| HSA-LET-7E-5P                   | -2,34 | 0,048780307 |
| HSA-MIR-190A-5P                 | -2,51 | NA          |
| HSA-LET-7D-3P                   | -2,53 | NA          |
| HSA-MIR-4301                    | -2,68 | NA          |
| HSA-MIR-15B-5P                  | -2,69 | NA          |
| HSA-LET-7I-3P                   | -2,83 | NA          |
| HSA-MIR-107                     | -3,08 | NA          |
| HSA-MIR-3613-5P                 | -3,51 | NA          |
| HSA-MIR-374A-5P                 | -3,58 | NA          |
