# Supplementary material for: Effects of Hypoxia on RNA Cargo in Extracellular Vesicles from Human Adipose-Derived Stromal/Stem Cells
Source: MDPI journal article supplement (doi:10.3390/ijms23137384), 2022-07-02
Supplement: s1 [file s1]

**Table S2. List of all significantly regulated transcripts.**

| <b>ENST</b>     | <b>Symbol</b> | <b>log2FC (hEVs/nEVs)</b> | <b>padj (hEVs/nEVs)</b> |
|-----------------|---------------|---------------------------|-------------------------|
| ENST00000341049 | CAV1          | 30.00                     | 1.2172E-10              |
| ENST00000530019 | FTH1          | 30.00                     | 1.2172E-10              |
| ENST00000510187 | SQSTM1        | 29.63                     | 1.2172E-10              |
| ENST00000262030 | ATP5F1B       | 29.55                     | 1.2172E-10              |
| ENST00000295955 | RPL9          | 29.48                     | 1.2172E-10              |
| ENST00000354420 | RNH1          | 29.44                     | 1.2172E-10              |
| ENST00000407332 | CYB5R3        | 29.42                     | 1.2172E-10              |
| ENST00000236671 | CTSD          | 29.37                     | 1.2172E-10              |
| ENST00000358278 | TPM1          | 29.36                     | 1.5481E-11              |
| ENST00000439696 | ZFP36L1       | 29.35                     | 1.2172E-10              |
| ENST00000451791 | PENK          | 29.34                     | 1.2172E-10              |
| ENST00000620463 | None          | 29.27                     | 1.2172E-10              |
| ENST00000643579 | TPM4          | 29.22                     | 1.2172E-10              |
| ENST00000467076 | FDPS          | 29.21                     | 1.2172E-10              |
| ENST00000434316 | TMCO3         | 29.20                     | 1.2172E-10              |
| ENST00000433215 | SPG21         | 29.20                     | 1.2172E-10              |
| ENST00000393467 | CAV1          | 29.12                     | 1.2172E-10              |
| ENST00000337554 | TSPO          | 29.07                     | 1.2172E-10              |
| ENST00000451728 | CNBP          | 29.02                     | 1.2172E-10              |
| ENST00000341872 | LGALS8        | 29.01                     | 1.2172E-10              |
| ENST00000294072 | CYB561A3      | 28.97                     | 1.2172E-10              |
| ENST00000602162 | ZNF611        | 28.97                     | 1.2172E-10              |
| ENST00000340828 | CCNG1         | 28.96                     | 1.2172E-10              |
| ENST00000348547 | ERGIC3        | 28.94                     | 1.2172E-10              |
| ENST00000619920 | PSMC3         | 28.92                     | 1.2172E-10              |
| ENST00000368209 | HDGF          | 28.89                     | 1.2172E-10              |
| ENST00000646241 | CTSA          | 28.87                     | 1.2172E-10              |
| ENST00000262139 | WIPI1         | 28.76                     | 1.2172E-10              |
| ENST00000341223 | CFL2          | 28.75                     | 1.2172E-10              |
| ENST00000450814 | TKT           | 28.75                     | 1.2172E-10              |
| ENST00000219204 | ARL2BP        | 28.70                     | 1.2172E-10              |
| ENST00000583389 | EIF4A1        | 28.70                     | 1.2172E-10              |
| ENST00000369349 | PDE4DIP       | 28.67                     | 1.2172E-10              |
| ENST00000329582 | IL20RB        | 28.66                     | 1.2172E-10              |
| ENST00000361234 | RNF34         | 28.62                     | 1.2172E-10              |
| ENST00000312263 | DCAF6         | 28.61                     | 1.2172E-10              |
| ENST00000395648 | TP53I11       | 28.60                     | 1.2172E-10              |
| ENST00000248879 | DGCR6L        | 28.58                     | 1.2172E-10              |
| ENST00000304786 | SRP9          | 28.56                     | 1.2172E-10              |
| ENST00000258770 | TBRG4         | 28.56                     | 1.2172E-10              |
| ENST00000432207 | CD36          | 28.52                     | 1.2172E-10              |
| ENST00000426002 | SHISA5        | 28.51                     | 1.2172E-10              |

|                 |          |       |            |
|-----------------|----------|-------|------------|
| ENST00000262812 | COPE     | 28.49 | 1.2172E-10 |
| ENST00000333256 | TSSC4    | 28.48 | 1.2172E-10 |
| ENST00000510283 | SPAG9    | 28.46 | 1.2172E-10 |
| ENST00000299767 | HSP90B1  | 28.45 | 1.2172E-10 |
| ENST00000278671 | LAMTOR1  | 28.45 | 1.2172E-10 |
| ENST00000325285 | FBXW5    | 28.44 | 1.2172E-10 |
| ENST00000563468 | GSPT1    | 28.44 | 1.2172E-10 |
| ENST00000369306 | PEX11B   | 28.41 | 1.2172E-10 |
| ENST00000552909 | LIMA1    | 28.39 | 1.2172E-10 |
| ENST00000216259 | PMM1     | 28.39 | 1.2172E-10 |
| ENST00000472642 | RHEB     | 28.39 | 1.2172E-10 |
| ENST00000529826 | BCLAF1   | 28.38 | 1.2172E-10 |
| ENST00000369642 | RHOC     | 28.35 | 1.2172E-10 |
| ENST00000301935 | UBXN1    | 28.33 | 1.2172E-10 |
| ENST00000317534 | MRPS24   | 28.32 | 1.2172E-10 |
| ENST00000360079 | XRCC6    | 28.32 | 1.2172E-10 |
| ENST00000397615 | RNH1     | 28.32 | 1.2172E-10 |
| ENST00000619599 | None     | 28.32 | 1.2172E-10 |
| ENST00000281141 | CDC123   | 28.31 | 1.2172E-10 |
| ENST00000532097 | PSMD13   | 28.30 | 1.2172E-10 |
| ENST00000301727 | E4F1     | 28.30 | 1.2172E-10 |
| ENST00000374492 | EDEM2    | 28.30 | 1.2172E-10 |
| ENST00000248244 | TICAM1   | 28.29 | 1.2172E-10 |
| ENST00000354488 | DDRGK1   | 28.28 | 1.2172E-10 |
| ENST00000353801 | HSP90AB1 | 28.28 | 1.2172E-10 |
| ENST00000622181 | None     | 28.27 | 1.2172E-10 |
| ENST00000534624 | HSPA8    | 28.27 | 1.2172E-10 |
| ENST00000529691 | ZNF202   | 28.26 | 1.2172E-10 |
| ENST00000358514 | PSMB10   | 28.26 | 1.2172E-10 |
| ENST00000311008 | SPNS1    | 28.24 | 1.2172E-10 |
| ENST00000295920 | GMPS     | 28.24 | 1.2172E-10 |
| ENST00000502499 | MATR3    | 28.22 | 1.2172E-10 |
| ENST00000606999 | None     | 28.22 | 1.2172E-10 |
| ENST00000409920 | ANXA4    | 28.22 | 1.2172E-10 |
| ENST00000649817 | KAT6A    | 28.21 | 1.2172E-10 |
| ENST00000371674 | UBE2V1   | 28.21 | 1.2172E-10 |
| ENST00000476756 | INSIG1   | 28.20 | 1.2172E-10 |
| ENST00000372390 | TSC22D3  | 28.20 | 1.2172E-10 |
| ENST00000534182 | ARCN1    | 28.19 | 1.2172E-10 |
| ENST00000552981 | SLC25A3  | 28.19 | 1.2172E-10 |
| ENST00000359671 | FN1      | 28.19 | 1.2509E-10 |
| ENST00000527974 | LGALS8   | 28.17 | 1.2172E-10 |
| ENST00000244519 | BTN3A3   | 28.15 | 1.2172E-10 |
| ENST00000448451 | DIAPH1   | 28.14 | 1.2172E-10 |
| ENST00000418740 | MRPS24   | 28.14 | 1.2172E-10 |

|                 |          |       |            |
|-----------------|----------|-------|------------|
| ENST00000268220 | SEC11A   | 28.13 | 1.2172E-10 |
| ENST00000216733 | EFS      | 28.13 | 1.2172E-10 |
| ENST00000303927 | CAVIN3   | 28.11 | 1.2172E-10 |
| ENST00000473244 | MED15    | 28.11 | 1.2172E-10 |
| ENST00000260956 | SSB      | 28.11 | 1.2172E-10 |
| ENST00000320172 | TENT5A   | 28.10 | 1.2172E-10 |
| ENST00000412318 | ANKRD28  | 28.10 | 1.2172E-10 |
| ENST00000304735 | VASN     | 28.10 | 1.2172E-10 |
| ENST00000447601 | FAM3A    | 28.09 | 1.2172E-10 |
| ENST00000029410 | B4GALT7  | 28.08 | 1.2172E-10 |
| ENST00000492773 | EIF2B5   | 28.04 | 1.2693E-10 |
| ENST00000479421 | YWHAB    | 28.03 | 1.2756E-10 |
| ENST00000267859 | BNIP2    | 28.00 | 1.3043E-10 |
| ENST00000394934 | None     | 27.99 | 1.3043E-10 |
| ENST00000580888 | None     | 27.96 | 1.3043E-10 |
| ENST00000406106 | PPP1R7   | 27.94 | 1.3043E-10 |
| ENST00000420247 | SCYL1    | 27.93 | 1.3043E-10 |
| ENST00000359479 | SLC33A1  | 27.92 | 1.3043E-10 |
| ENST00000194530 | STRADB   | 27.91 | 1.3043E-10 |
| ENST00000339093 | NOSIP    | 27.91 | 1.3043E-10 |
| ENST00000518047 | DIAPH1   | 27.91 | 1.3043E-10 |
| ENST00000525095 | VPS26B   | 27.91 | 1.3043E-10 |
| ENST00000357519 | FIBP     | 27.90 | 1.3043E-10 |
| ENST00000295704 | RNF25    | 27.90 | 1.3043E-10 |
| ENST00000435572 | NFE2     | 27.89 | 1.3043E-10 |
| ENST00000370854 | ZDHHC16  | 27.89 | 1.3043E-10 |
| ENST00000495186 | EBP      | 27.88 | 1.3043E-10 |
| ENST00000614294 | DUSP14   | 27.88 | 1.3043E-10 |
| ENST00000447532 | CYB561A3 | 27.86 | 1.3043E-10 |
| ENST00000368235 | NAXE     | 27.86 | 1.3043E-10 |
| ENST00000377710 | MGME1    | 27.86 | 1.3043E-10 |
| ENST00000548044 | NAP1L1   | 27.86 | 1.3043E-10 |
| ENST00000253794 | VPS25    | 27.84 | 1.3043E-10 |
| ENST00000420250 | ASNSD1   | 27.84 | 1.3043E-10 |
| ENST00000403490 | IMP3     | 27.83 | 1.3043E-10 |
| ENST00000535923 | PHB2     | 27.83 | 1.3043E-10 |
| ENST00000265038 | ERCC8    | 27.83 | 1.3043E-10 |
| ENST00000537057 | PRKAB1   | 27.82 | 1.3043E-10 |
| ENST00000263867 | CAPG     | 27.82 | 1.3043E-10 |
| ENST00000647446 | GPI      | 27.81 | 1.3043E-10 |
| ENST00000644593 | CRYL1    | 27.79 | 1.3043E-10 |
| ENST00000577789 | FLOT2    | 27.78 | 1.3043E-10 |
| ENST00000653961 | TPM4     | 27.78 | 1.3043E-10 |
| ENST00000367804 | SLC19A2  | 27.78 | 1.3043E-10 |
| ENST00000396969 | DNAJB1   | 27.78 | 1.3043E-10 |

|                 |          |       |            |
|-----------------|----------|-------|------------|
| ENST00000301458 | CD320    | 27.77 | 1.3043E-10 |
| ENST00000292807 | AP2M1    | 27.77 | 1.3043E-10 |
| ENST00000235835 | AKR7A2   | 27.76 | 1.3043E-10 |
| ENST00000507528 | PDCD6    | 27.76 | 1.3043E-10 |
| ENST00000611266 | OSBPL8   | 27.76 | 1.3043E-10 |
| ENST00000538721 | PCYT2    | 27.75 | 1.3043E-10 |
| ENST00000372868 | CCN5     | 27.75 | 1.3043E-10 |
| ENST00000368954 | CERS2    | 27.75 | 1.3043E-10 |
| ENST00000397415 | RPL7L1   | 27.75 | 1.3043E-10 |
| ENST00000263309 | CLNS1A   | 27.75 | 1.3043E-10 |
| ENST00000526049 | SELENOS  | 27.74 | 1.3492E-10 |
| ENST00000440960 | PRELID3A | 27.74 | 1.3043E-10 |
| ENST00000442046 | MACF1    | 27.74 | 1.3043E-10 |
| ENST00000357849 | COPS5    | 27.73 | 1.3043E-10 |
| ENST00000379412 | LDHA     | 27.73 | 1.3043E-10 |
| ENST00000673204 | None     | 27.73 | 1.3043E-10 |
| ENST00000252288 | GAMT     | 27.73 | 1.3043E-10 |
| ENST00000541050 | CORO1C   | 27.70 | 1.3043E-10 |
| ENST00000636882 | RILPL1   | 27.70 | 1.3043E-10 |
| ENST00000370053 | STMN3    | 27.70 | 1.3043E-10 |
| ENST00000294258 | ZFPL1    | 27.70 | 1.3043E-10 |
| ENST00000398030 | APEX1    | 27.69 | 1.3043E-10 |
| ENST00000353245 | YWHAZ    | 27.69 | 1.3043E-10 |
| ENST00000369332 | MAP3K7   | 27.68 | 1.3043E-10 |
| ENST00000450852 | MOCOS2   | 27.68 | 1.3043E-10 |
| ENST00000347048 | PTPA     | 27.68 | 1.3043E-10 |
| ENST00000444739 | CASP4    | 27.67 | 1.3043E-10 |
| ENST00000203630 | MLF2     | 27.67 | 1.3043E-10 |
| ENST00000616143 | MARCHF8  | 27.65 | 1.3043E-10 |
| ENST00000324862 | PRPF3    | 27.65 | 1.3043E-10 |
| ENST00000430379 | SLC25A20 | 27.64 | 1.3043E-10 |
| ENST00000503617 | FAM200B  | 27.62 | 1.3043E-10 |
| ENST00000522098 | CLU      | 27.62 | 1.3043E-10 |
| ENST00000424922 | CALD1    | 27.62 | 1.3043E-10 |
| ENST00000378546 | FAAP20   | 27.62 | 1.3043E-10 |
| ENST00000641927 | PHGDH    | 27.62 | 1.3043E-10 |
| ENST00000659595 | TPM4     | 27.61 | 1.3043E-10 |
| ENST00000588991 | GPI      | 27.61 | 1.3043E-10 |
| ENST00000358139 | PDE1A    | 27.61 | 1.3043E-10 |
| ENST00000272424 | TPRKB    | 27.60 | 1.3043E-10 |
| ENST00000357052 | RAB4B    | 27.60 | 1.3043E-10 |
| ENST00000449349 | THNSL2   | 27.59 | 1.3043E-10 |
| ENST00000452857 | ELMO2    | 27.59 | 1.3043E-10 |
| ENST00000522223 | RASA4    | 27.58 | 1.3043E-10 |
| ENST00000428192 | OTUB1    | 27.58 | 1.3043E-10 |

|                 |         |       |            |
|-----------------|---------|-------|------------|
| ENST00000418625 | COPS6   | 27.57 | 1.3043E-10 |
| ENST00000326335 | CUL4A   | 27.57 | 1.3043E-10 |
| ENST00000396265 | TSPO    | 27.57 | 1.3043E-10 |
| ENST00000435345 | SCP2    | 27.56 | 1.3043E-10 |
| ENST00000227157 | LDHA    | 27.55 | 1.3043E-10 |
| ENST00000672078 | None    | 27.55 | 1.3043E-10 |
| ENST00000318158 | GRHPR   | 27.55 | 1.3043E-10 |
| ENST00000476163 | CAMTA1  | 27.55 | 1.3043E-10 |
| ENST00000650247 | IGFBP6  | 27.55 | 1.3043E-10 |
| ENST00000217971 | PGRMC1  | 27.54 | 1.3043E-10 |
| ENST00000535589 | ACTR3   | 27.54 | 1.3043E-10 |
| ENST00000520367 | ENDOV   | 27.53 | 1.3043E-10 |
| ENST00000543485 | MMP2    | 27.53 | 1.3043E-10 |
| ENST00000381140 | GTF3A   | 27.53 | 1.3043E-10 |
| ENST00000342407 | INSIG1  | 27.52 | 1.3043E-10 |
| ENST00000536442 | CCDC91  | 27.52 | 1.3043E-10 |
| ENST00000374450 | EIF6    | 27.52 | 1.5660E-10 |
| ENST00000314673 | SNX14   | 27.52 | 1.3043E-10 |
| ENST00000479595 | None    | 27.52 | 1.3043E-10 |
| ENST00000555932 | MAX     | 27.51 | 1.3049E-10 |
| ENST00000315808 | PHF20L1 | 27.51 | 1.3049E-10 |
| ENST00000376488 | OTUD5   | 27.50 | 1.3138E-10 |
| ENST00000493518 | CACUL1  | 27.49 | 1.3171E-10 |
| ENST00000220849 | EIF3S6  | 27.49 | 1.3247E-10 |
| ENST00000608083 | ACOT7   | 27.47 | 1.3434E-10 |
| ENST00000397133 | EMC6    | 27.46 | 1.3459E-10 |
| ENST00000319273 | TAC1    | 27.46 | 1.3459E-10 |
| ENST00000418391 | DEF8    | 27.45 | 1.3492E-10 |
| ENST00000481941 | DHX36   | 27.44 | 1.3492E-10 |
| ENST00000602866 | PSMC3   | 27.44 | 1.3492E-10 |
| ENST00000606142 | LAP3    | 27.44 | 1.3967E-10 |
| ENST00000380498 | CD68    | 27.44 | 1.3492E-10 |
| ENST00000427217 | ARPC1B  | 27.44 | 1.3492E-10 |
| ENST00000592299 | SPHK1   | 27.44 | 1.3495E-10 |
| ENST00000372508 | ZNF691  | 27.43 | 1.3492E-10 |
| ENST00000449058 | TOM1    | 27.43 | 1.3492E-10 |
| ENST00000648694 | PEG3    | 27.43 | 1.3492E-10 |
| ENST00000266263 | MTFP1   | 27.42 | 1.5231E-10 |
| ENST00000395047 | VDAC1   | 27.41 | 1.3657E-10 |
| ENST00000376809 | HLA-A   | 27.41 | 1.5601E-10 |
| ENST00000322776 | NDUFV1  | 27.41 | 1.5660E-10 |
| ENST00000648869 | None    | 27.41 | 1.3657E-10 |
| ENST00000380985 | NLN     | 27.41 | 1.3657E-10 |
| ENST00000560765 | None    | 27.39 | 1.3818E-10 |
| ENST00000432261 | RNF24   | 27.39 | 1.4097E-10 |

|                 |            |       |            |
|-----------------|------------|-------|------------|
| ENST00000221855 | TBCB       | 27.38 | 1.4032E-10 |
| ENST00000544301 | HEL113     | 27.37 | 1.4097E-10 |
| ENST00000380625 | FAM9C      | 27.36 | 1.4097E-10 |
| ENST00000610455 | DEF8       | 27.36 | 1.4097E-10 |
| ENST00000345523 | None       | 27.35 | 1.4097E-10 |
| ENST00000411774 | None       | 27.35 | 1.4097E-10 |
| ENST00000531289 | RAB2A      | 27.34 | 1.4097E-10 |
| ENST00000267973 | WDR61      | 27.34 | 1.4097E-10 |
| ENST00000624247 | SMTN       | 27.34 | 1.4097E-10 |
| ENST00000304511 | TMEM126A   | 27.34 | 1.4097E-10 |
| ENST00000326427 | ITM2C      | 27.31 | 1.6727E-10 |
| ENST00000373146 | ST6GALNAC6 | 27.31 | 1.6727E-10 |
| ENST00000396549 | MFAP5      | 27.24 | 1.5660E-10 |
| ENST00000547382 | LMBR1L     | 27.24 | 1.5660E-10 |
| ENST00000545312 | PLXNC1     | 27.24 | 1.5660E-10 |
| ENST00000407022 | BSCL2      | 27.24 | 1.6998E-10 |
| ENST00000572995 | PCYT2      | 27.23 | 1.5660E-10 |
| ENST00000556766 | GNG2       | 27.22 | 1.5660E-10 |
| ENST00000317058 | SGF29      | 27.22 | 1.5660E-10 |
| ENST00000333651 | HMG20B     | 27.21 | 1.6248E-10 |
| ENST00000497571 | KLF6       | 27.21 | 1.5660E-10 |
| ENST00000415688 | STRADB     | 27.21 | 1.5660E-10 |
| ENST00000391881 | CYTH2      | 27.21 | 1.5660E-10 |
| ENST00000527302 | RPS2       | 27.20 | 1.5660E-10 |
| ENST00000375446 | NINJ1      | 27.20 | 1.5660E-10 |
| ENST00000405867 | HADHB      | 27.20 | 1.5660E-10 |
| ENST00000395314 | KTN1       | 27.20 | 1.5660E-10 |
| ENST00000268668 | NDUFB10    | 27.20 | 1.5660E-10 |
| ENST00000397070 | TM2D2      | 27.20 | 1.5660E-10 |
| ENST00000509606 | HSD17B4    | 27.17 | 1.6083E-10 |
| ENST00000592290 | FXD5       | 27.17 | 1.6083E-10 |
| ENST00000438169 | KRR1       | 27.17 | 1.6083E-10 |
| ENST00000474033 | MXRA8      | 27.17 | 1.6083E-10 |
| ENST00000415213 | BNIP2      | 27.15 | 1.6325E-10 |
| ENST00000613052 | None       | 27.15 | 1.6325E-10 |
| ENST00000277010 | SIGMAR1    | 27.14 | 1.6727E-10 |
| ENST00000521309 | YWHAZ      | 27.14 | 1.6338E-10 |
| ENST00000333449 | TMEM179B   | 27.14 | 1.6727E-10 |
| ENST00000463674 | BACE2      | 27.13 | 1.6338E-10 |
| ENST00000221801 | FBL        | 27.13 | 1.6338E-10 |
| ENST00000625241 | None       | 27.13 | 1.6338E-10 |
| ENST00000632796 | None       | 27.13 | 1.6338E-10 |
| ENST00000314392 | DPM2       | 27.13 | 1.6338E-10 |
| ENST00000305784 | DTYMK      | 27.12 | 1.6338E-10 |
| ENST00000423516 | TKT        | 27.12 | 1.6338E-10 |

|                 |          |       |            |
|-----------------|----------|-------|------------|
| ENST00000581767 | DDX42    | 27.12 | 1.6338E-10 |
| ENST00000452462 | RBMS3    | 27.12 | 1.6338E-10 |
| ENST00000652974 | CALM2    | 27.12 | 1.6727E-10 |
| ENST00000569693 | ADPGK    | 27.12 | 1.6338E-10 |
| ENST00000416293 | ALDH2    | 27.12 | 1.6338E-10 |
| ENST00000366728 | GUK1     | 27.12 | 1.6727E-10 |
| ENST00000409197 | DYNC1I2  | 27.11 | 1.6727E-10 |
| ENST00000468043 | SLC66A1L | 27.11 | 1.6373E-10 |
| ENST00000541435 | FXYD5    | 27.11 | 1.6373E-10 |
| ENST00000316626 | GSK3B    | 27.10 | 1.6373E-10 |
| ENST00000319725 | FUBP3    | 27.10 | 1.6727E-10 |
| ENST00000353332 | MTMR14   | 27.10 | 1.6373E-10 |
| ENST00000509359 | TIMM8B   | 27.10 | 1.6373E-10 |
| ENST00000359478 | MFAP5    | 27.10 | 1.6727E-10 |
| ENST00000395238 | IP6K1    | 27.10 | 1.6727E-10 |
| ENST00000377595 | UCHL3    | 27.10 | 1.6727E-10 |
| ENST00000426421 | CAPZA2   | 27.10 | 1.6727E-10 |
| ENST00000621955 | None     | 27.10 | 1.6727E-10 |
| ENST00000586425 | GPI      | 27.09 | 1.6727E-10 |
| ENST00000264080 | GPR108   | 27.09 | 1.6727E-10 |
| ENST00000407712 | CBLB     | 27.08 | 1.6727E-10 |
| ENST00000372257 | ERI3     | 27.08 | 1.6727E-10 |
| ENST00000324001 | PRX      | 27.08 | 1.6727E-10 |
| ENST00000351829 | AKR1A1   | 27.08 | 1.6727E-10 |
| ENST00000530996 | CHMP4A   | 27.08 | 1.6727E-10 |
| ENST00000643482 | CHMP4A   | 27.08 | 1.6727E-10 |
| ENST00000508076 | TGFBI    | 27.08 | 1.6727E-10 |
| ENST00000359208 | DNTTIP2  | 27.08 | 1.6727E-10 |
| ENST00000372838 | CERCAM   | 27.05 | 1.6727E-10 |
| ENST00000315758 | MDH2     | 27.04 | 1.9542E-10 |
| ENST00000304298 | HSPB2    | 27.04 | 1.9542E-10 |
| ENST00000367287 | TIMM17A  | 27.03 | 1.6962E-10 |
| ENST00000563060 | ALDOA    | 27.02 | 1.6727E-10 |
| ENST00000504102 | SPOP     | 27.02 | 1.6727E-10 |
| ENST00000393991 | TSC22D4  | 27.02 | 1.6727E-10 |
| ENST00000402799 | MADD     | 27.01 | 1.6727E-10 |
| ENST00000253099 | MRPL4    | 27.01 | 1.6727E-10 |
| ENST00000374706 | CCNY     | 27.01 | 1.6727E-10 |
| ENST00000343827 | TCF12    | 27.01 | 1.7309E-10 |
| ENST00000383694 | FILIP1L  | 27.01 | 1.6727E-10 |
| ENST00000514505 | BTF3     | 27.00 | 1.7323E-10 |
| ENST00000487747 | SMC4     | 27.00 | 1.6727E-10 |
| ENST00000310118 | PSMD2    | 27.00 | 1.6727E-10 |
| ENST00000620761 | ACD      | 26.99 | 1.7274E-10 |
| ENST00000439741 | MTMR11   | 26.99 | 1.6727E-10 |

|                 |          |       |            |
|-----------------|----------|-------|------------|
| ENST00000380546 | SERPINB6 | 26.98 | 1.6727E-10 |
| ENST00000444840 | MRPS25   | 26.98 | 1.6727E-10 |
| ENST00000335698 | ATP5F1C  | 26.98 | 1.6727E-10 |
| ENST00000651476 | UROD     | 26.98 | 1.6727E-10 |
| ENST00000282058 | HAUS1    | 26.98 | 1.6727E-10 |
| ENST00000566113 | CDIPT    | 26.98 | 1.6727E-10 |
| ENST00000558653 | DTWD1    | 26.98 | 1.6727E-10 |
| ENST00000527350 | FEZ1     | 26.98 | 1.6727E-10 |
| ENST00000369329 | MAP3K7   | 26.96 | 1.6943E-10 |
| ENST00000412584 | CADPS2   | 26.96 | 1.6943E-10 |
| ENST00000215375 | ATP5F1D  | 26.96 | 1.6961E-10 |
| ENST00000527899 | CRYAB    | 26.95 | 1.6962E-10 |
| ENST00000419121 | BSDC1    | 26.95 | 1.6962E-10 |
| ENST00000345264 | RSU1     | 26.95 | 1.6962E-10 |
| ENST00000458167 | GPN1     | 26.94 | 1.6998E-10 |
| ENST00000476671 | KMT2E    | 26.94 | 1.9967E-10 |
| ENST00000530731 | TBRG1    | 26.93 | 1.9967E-10 |
| ENST00000437787 | CD99L2   | 26.93 | 1.7309E-10 |
| ENST00000371514 | SCP2     | 26.93 | 1.9967E-10 |
| ENST00000447566 | SLC25A17 | 26.93 | 1.9967E-10 |
| ENST00000397408 | TSPAN4   | 26.92 | 1.7323E-10 |
| ENST00000299438 | CYB5A    | 26.92 | 1.9967E-10 |
| ENST00000589737 | POLR2E   | 26.91 | 1.7323E-10 |
| ENST00000369637 | RHOC     | 26.91 | 1.7323E-10 |
| ENST00000547568 | DCN      | 26.91 | 1.7323E-10 |
| ENST00000462138 | TKT      | 26.91 | 1.7323E-10 |
| ENST00000393028 | GIPC1    | 26.91 | 1.7354E-10 |
| ENST00000460039 | TMCO3    | 26.90 | 1.7466E-10 |
| ENST00000421097 | COASY    | 26.88 | 1.7811E-10 |
| ENST00000430553 | LDHA     | 26.87 | 1.7811E-10 |
| ENST00000620312 | None     | 26.87 | 1.7811E-10 |
| ENST00000672996 | None     | 26.87 | 1.7811E-10 |
| ENST00000373166 | TRAPPC3  | 26.87 | 1.7811E-10 |
| ENST00000380946 | KLF6     | 26.87 | 1.7811E-10 |
| ENST00000309244 | ETFB     | 26.87 | 1.7811E-10 |
| ENST00000404295 | NMRAL1   | 26.86 | 1.7811E-10 |
| ENST00000616587 | None     | 26.86 | 1.7811E-10 |
| ENST00000249736 | SLTM     | 26.86 | 1.7857E-10 |
| ENST00000558265 | EIF5     | 26.86 | 1.7860E-10 |
| ENST00000614273 | CYP1B1   | 26.86 | 1.7882E-10 |
| ENST00000464228 | ITGB1BP1 | 26.85 | 1.7893E-10 |
| ENST00000465759 | CCDC174  | 26.85 | 1.7882E-10 |
| ENST00000596655 | C19orf48 | 26.85 | 1.7882E-10 |
| ENST00000515017 | ANXA5    | 26.85 | 1.7882E-10 |
| ENST00000265963 | GTF2H1   | 26.84 | 1.8240E-10 |



|                 |                |       |            |
|-----------------|----------------|-------|------------|
| ENST00000672527 | GTF2H1         | 26.84 | 1.8240E-10 |
| ENST00000430330 | SCP2           | 26.83 | 1.8240E-10 |
| ENST00000462330 | TXNRD2         | 26.83 | 1.8240E-10 |
| ENST00000279270 | None           | 26.82 | 1.9967E-10 |
| ENST00000319471 | SORBS2         | 26.82 | 1.8406E-10 |
| ENST00000524958 | C11orf98       | 26.81 | 1.8453E-10 |
| ENST00000644285 | ANKRD11        | 26.81 | 1.8533E-10 |
| ENST00000403712 | SH3YL1         | 26.81 | 1.8453E-10 |
| ENST00000303731 | TRAPPC1        | 26.81 | 1.8453E-10 |
| ENST00000377139 | IRF3           | 26.81 | 1.8453E-10 |
| ENST00000553300 | HNRNPC         | 26.80 | 1.8453E-10 |
| ENST00000362052 | ENSA           | 26.80 | 1.8453E-10 |
| ENST00000369314 | POLR3GL        | 26.76 | 1.9259E-10 |
| ENST00000518374 | COPS5          | 26.76 | 1.9341E-10 |
| ENST00000586636 | CIRBP          | 26.76 | 1.9341E-10 |
| ENST00000371663 | RABL6          | 26.75 | 1.9404E-10 |
| ENST00000381570 | RNF6           | 26.75 | 1.9404E-10 |
| ENST00000616346 | None           | 26.75 | 1.9404E-10 |
| ENST00000617832 | TIMM22         | 26.74 | 1.9404E-10 |
| ENST00000613269 | TIMM22         | 26.74 | 1.9404E-10 |
| ENST00000403747 | UBE2I          | 26.74 | 1.9967E-10 |
| ENST00000587994 | ACAA2          | 26.74 | 1.9967E-10 |
| ENST00000598418 | JOSD2          | 26.74 | 1.9967E-10 |
| ENST00000554507 | KTN1           | 26.73 | 1.9967E-10 |
| ENST00000608443 | FKBP8          | 26.73 | 1.9967E-10 |
| ENST00000372554 | SH3GLB2        | 26.72 | 1.9572E-10 |
| ENST00000399523 | UFD1           | 26.72 | 1.9572E-10 |
| ENST00000464988 | RBM5           | 26.72 | 1.9572E-10 |
| ENST00000472931 | ETV1           | 26.72 | 1.9967E-10 |
| ENST00000584895 | RPL17-C18orf32 | 26.72 | 1.9572E-10 |
| ENST00000539040 | RIT1           | 26.72 | 1.9572E-10 |
| ENST00000251074 | NUP37          | 26.72 | 1.9572E-10 |
| ENST00000498639 | CPB1           | 26.72 | 1.9572E-10 |
| ENST00000510338 | ZBTB38         | 26.72 | 1.9572E-10 |
| ENST00000615871 | AUTS2          | 26.71 | 1.9643E-10 |
| ENST00000574924 | ANAPC11        | 26.71 | 1.9967E-10 |
| ENST00000636409 | ATP6AP2        | 26.71 | 1.9674E-10 |
| ENST00000622898 | DTNBP1         | 26.71 | 1.9967E-10 |
| ENST00000535411 | MFAP5          | 26.70 | 1.9867E-10 |
| ENST00000648109 | C1orf21        | 26.70 | 1.9867E-10 |
| ENST00000417750 | LMBR1L         | 26.70 | 1.9876E-10 |
| ENST00000473629 | TBRG1          | 26.69 | 2.0027E-10 |
| ENST00000397424 | EPC2           | 26.69 | 1.9967E-10 |
| ENST00000648046 | GRB2           | 26.68 | 1.9967E-10 |
| ENST00000586802 | HDAC5          | 26.68 | 2.0131E-10 |

|                 |         |       |            |
|-----------------|---------|-------|------------|
| ENST00000323213 | EIF3M   | 26.68 | 1.9967E-10 |
| ENST00000374643 | YIPF6   | 26.68 | 1.9967E-10 |
| ENST00000642241 | CBLB    | 26.67 | 1.9967E-10 |
| ENST00000372259 | ERI3    | 26.67 | 1.9967E-10 |
| ENST00000487106 | LAMTOR2 | 26.67 | 1.9967E-10 |
| ENST00000392568 | NUDT14  | 26.67 | 2.0177E-10 |
| ENST00000469858 | SMC4    | 26.67 | 1.9967E-10 |
| ENST00000433983 | ETFA    | 26.67 | 2.0125E-10 |
| ENST00000344114 | HERPUD1 | 26.67 | 2.0125E-10 |
| ENST00000497931 | ARMCX6  | 26.67 | 1.9967E-10 |
| ENST00000467199 | HEL97   | 26.66 | 2.0177E-10 |
| ENST00000420846 | CD63    | 26.66 | 2.0177E-10 |
| ENST00000484262 | WIPI2   | 26.66 | 2.0177E-10 |
| ENST00000455824 | ST13    | 26.66 | 1.9967E-10 |
| ENST00000544392 | CACUL1  | 26.65 | 1.9967E-10 |
| ENST00000261623 | CYBA    | 26.65 | 1.9967E-10 |
| ENST00000305978 | SCAND1  | 26.65 | 1.9967E-10 |
| ENST00000531496 | SYTL2   | 26.65 | 1.9967E-10 |
| ENST00000398020 | PIP4P1  | 26.65 | 2.0273E-10 |
| ENST00000374436 | EIF6    | 26.65 | 1.9967E-10 |
| ENST00000357355 | ADGRE5  | 26.65 | 2.0273E-10 |
| ENST00000584289 | PSMD12  | 26.65 | 1.9967E-10 |
| ENST00000568886 | VAC14   | 26.65 | 2.0273E-10 |
| ENST00000345519 | CLTA    | 26.64 | 1.9967E-10 |
| ENST00000532444 | EIF3M   | 26.64 | 1.9967E-10 |
| ENST00000055077 | RFC2    | 26.64 | 1.9967E-10 |
| ENST00000493831 | ETV1    | 26.64 | 1.9967E-10 |
| ENST00000545822 | HADHB   | 26.64 | 1.9967E-10 |
| ENST00000265304 | SSBP1   | 26.64 | 2.0333E-10 |
| ENST00000570767 | RSL1D1  | 26.63 | 2.0333E-10 |
| ENST00000553966 | DAAM1   | 26.63 | 1.9967E-10 |
| ENST00000531405 | ZNRD2   | 26.63 | 2.0333E-10 |
| ENST00000443660 | MRPL40  | 26.63 | 1.9967E-10 |
| ENST00000642789 | TPM4    | 26.63 | 1.9967E-10 |
| ENST00000248451 | PNKD    | 26.63 | 1.9967E-10 |
| ENST00000303698 | NFU1    | 26.62 | 1.9967E-10 |
| ENST00000450863 | GOLGA4  | 26.62 | 2.0333E-10 |
| ENST00000352327 | THYN1   | 26.62 | 2.0333E-10 |
| ENST00000513231 | UBE2K   | 26.62 | 2.0333E-10 |
| ENST00000394048 | ESYT1   | 26.62 | 2.0333E-10 |
| ENST00000508500 | None    | 26.62 | 1.9967E-10 |
| ENST00000466494 | IDH3B   | 26.62 | 1.9967E-10 |
| ENST00000326134 | MROH1   | 26.61 | 1.9967E-10 |
| ENST00000515708 | TSPAN17 | 26.61 | 1.9967E-10 |
| ENST00000228922 | OGFOD2  | 26.61 | 1.9967E-10 |

|                 |         |       |            |
|-----------------|---------|-------|------------|
| ENST00000438848 | PPP1R2  | 26.60 | 1.9967E-10 |
| ENST00000598626 | GPR108  | 26.60 | 1.9967E-10 |
| ENST00000272898 | None    | 26.60 | 1.9967E-10 |
| ENST00000445439 | PPP2R5C | 26.60 | 1.9967E-10 |
| ENST00000471189 | UQCRC1  | 26.60 | 1.9967E-10 |
| ENST00000535020 | NAP1L1  | 26.59 | 1.9967E-10 |
| ENST00000526180 | CRYAB   | 26.59 | 1.9967E-10 |
| ENST00000191018 | CTSA    | 26.59 | 1.9967E-10 |
| ENST00000457167 | DNAJC7  | 26.59 | 1.9967E-10 |
| ENST00000372433 | HYI     | 26.58 | 2.0333E-10 |
| ENST00000412476 | PHYHD1  | 26.58 | 2.0333E-10 |
| ENST00000276704 | C8orf76 | 26.58 | 1.9967E-10 |
| ENST00000520210 | ELOC    | 26.58 | 1.9967E-10 |
| ENST00000555431 | ATP6V1D | 26.58 | 1.9967E-10 |
| ENST00000400052 | CLIC1   | 26.58 | 1.9967E-10 |
| ENST00000375784 | CLIC1   | 26.58 | 1.9967E-10 |
| ENST00000425464 | CLIC1   | 26.58 | 1.9967E-10 |
| ENST00000422167 | CLIC1   | 26.58 | 1.9967E-10 |
| ENST00000418285 | CLIC1   | 26.58 | 1.9967E-10 |
| ENST00000456863 | CLIC1   | 26.58 | 1.9967E-10 |
| ENST00000457485 | CLIC1   | 26.58 | 1.9967E-10 |
| ENST00000637071 | POLR1D  | 26.58 | 1.9967E-10 |
| ENST00000483765 | RPL21   | 26.58 | 1.9970E-10 |
| ENST00000450235 | MAD1L1  | 26.57 | 2.0333E-10 |
| ENST00000426960 | ARL6IP4 | 26.57 | 2.0019E-10 |
| ENST00000422957 | KRT223P | 26.57 | 2.0021E-10 |
| ENST00000348411 | FTSJ1   | 26.57 | 2.0023E-10 |
| ENST00000539887 | STRAP   | 26.56 | 2.0027E-10 |
| ENST00000490235 | VEPH1   | 26.56 | 2.0120E-10 |
| ENST00000478247 | DVL3    | 26.56 | 2.0389E-10 |
| ENST00000427895 | GNB2    | 26.55 | 2.0125E-10 |
| ENST00000425172 | INSIG1  | 26.55 | 2.0131E-10 |
| ENST00000395560 | UPP1    | 26.55 | 2.0464E-10 |
| ENST00000548921 | SCRN3   | 26.55 | 2.0131E-10 |
| ENST00000309328 | ZNRD2   | 26.55 | 2.3169E-10 |
| ENST00000441728 | UBE2F   | 26.55 | 2.0133E-10 |
| ENST00000262722 | FBLN1   | 26.55 | 2.0136E-10 |
| ENST00000403633 | BUD31   | 26.54 | 2.0177E-10 |
| ENST00000378891 | DVL1    | 26.54 | 2.0946E-10 |
| ENST00000419582 | PTPA    | 26.54 | 2.0177E-10 |
| ENST00000591099 | PLEKHJ1 | 26.54 | 2.0177E-10 |
| ENST00000350605 | PYCARD  | 26.54 | 2.0177E-10 |
| ENST00000380996 | TSSC4   | 26.53 | 2.0177E-10 |
| ENST00000468479 | FDPS    | 26.53 | 2.1139E-10 |
| ENST00000246784 | BCL2L12 | 26.53 | 2.0177E-10 |

|                 |          |       |            |
|-----------------|----------|-------|------------|
| ENST00000267869 | GTF2A2   | 26.53 | 2.0177E-10 |
| ENST00000551446 | NFYB     | 26.52 | 2.0255E-10 |
| ENST00000254940 | NIP7     | 26.52 | 2.0273E-10 |
| ENST00000558582 | NUSAP1   | 26.52 | 2.0273E-10 |
| ENST00000648280 | COPA     | 26.52 | 2.0273E-10 |
| ENST00000526975 | CFL1     | 26.51 | 2.1218E-10 |
| ENST00000221418 | ECH1     | 26.51 | 2.0273E-10 |
| ENST00000634245 | ECH1     | 26.51 | 2.0273E-10 |
| ENST00000560979 | FGF7     | 26.51 | 2.1361E-10 |
| ENST00000487888 | DENND10  | 26.51 | 2.0275E-10 |
| ENST00000567958 | PSMD7    | 26.51 | 2.0275E-10 |
| ENST00000425490 | TRIM22   | 26.50 | 2.1424E-10 |
| ENST00000409953 | UBE2F    | 26.50 | 2.0333E-10 |
| ENST00000579755 | CDKN2A   | 26.49 | 2.0333E-10 |
| ENST00000517671 | NPM1     | 26.49 | 2.2796E-10 |
| ENST00000475043 | PDPN     | 26.49 | 2.0333E-10 |
| ENST00000356708 | ATP5F1C  | 26.49 | 2.0333E-10 |
| ENST00000395678 | TYMP     | 26.48 | 2.1911E-10 |
| ENST00000236980 | KIAA0971 | 26.48 | 2.0333E-10 |
| ENST00000467324 | TSN      | 26.48 | 2.0333E-10 |
| ENST00000619865 | None     | 26.47 | 2.0389E-10 |
| ENST00000534940 | ASMTL    | 26.47 | 2.1965E-10 |
| ENST00000545215 | LDHA     | 26.47 | 2.1965E-10 |
| ENST00000672754 | None     | 26.47 | 2.1965E-10 |
| ENST00000589934 | APBA3    | 26.47 | 2.0395E-10 |
| ENST00000601048 | SELENOW  | 26.47 | 2.0395E-10 |
| ENST00000467315 | PFKL     | 26.47 | 2.0576E-10 |
| ENST00000521514 | ATP6V1C1 | 26.46 | 2.0576E-10 |
| ENST00000578663 | CDK5RAP3 | 26.46 | 2.0584E-10 |
| ENST00000628684 | SLTM     | 26.46 | 2.0584E-10 |
| ENST00000392757 | LHPP     | 26.46 | 2.3526E-10 |
| ENST00000272227 | PDIA6    | 26.46 | 2.3526E-10 |
| ENST00000417292 | SSB      | 26.45 | 2.0687E-10 |
| ENST00000644774 | ACTG1    | 26.45 | 2.0687E-10 |
| ENST00000530796 | GPAA1    | 26.45 | 2.0698E-10 |
| ENST00000467084 | MRPS24   | 26.45 | 2.0708E-10 |
| ENST00000403094 | FASTKD2  | 26.45 | 2.2152E-10 |
| ENST00000647559 | None     | 26.44 | 2.0772E-10 |
| ENST00000404405 | PPP1R7   | 26.44 | 2.0901E-10 |
| ENST00000626873 | SH3YL1   | 26.42 | 2.1198E-10 |
| ENST00000188376 | SLC25A3  | 26.42 | 2.1218E-10 |
| ENST00000449653 | COMT     | 26.42 | 2.2472E-10 |
| ENST00000377911 | RSU1     | 26.42 | 2.1245E-10 |
| ENST00000478935 | ARL6IP5  | 26.41 | 2.2485E-10 |
| ENST00000509182 | DIMT1    | 26.41 | 2.1371E-10 |

|                 |          |       |            |
|-----------------|----------|-------|------------|
| ENST00000531551 | CTSB     | 26.41 | 2.1371E-10 |
| ENST00000571105 | PCYT2    | 26.41 | 2.1381E-10 |
| ENST00000476170 | PHYKPL   | 26.40 | 2.2485E-10 |
| ENST00000494864 | CYP1B1   | 26.40 | 2.2485E-10 |
| ENST00000503411 | SDAD1    | 26.40 | 2.2485E-10 |
| ENST00000549115 | CHURC1   | 26.40 | 2.2485E-10 |
| ENST00000529581 | SYTL2    | 26.40 | 2.2485E-10 |
| ENST00000354914 | SCARA5   | 26.39 | 2.1715E-10 |
| ENST00000528265 | SPCS2    | 26.39 | 2.1891E-10 |
| ENST00000589265 | GRN      | 26.39 | 2.1891E-10 |
| ENST00000244217 | MCEE     | 26.38 | 2.2001E-10 |
| ENST00000498491 | FLNA     | 26.37 | 2.2012E-10 |
| ENST00000515430 | FAM200B  | 26.37 | 2.2061E-10 |
| ENST00000578105 | SKA2     | 26.36 | 2.2152E-10 |
| ENST00000377254 | THNSL2   | 26.36 | 2.2152E-10 |
| ENST00000548176 | IGFBP6   | 26.36 | 2.2152E-10 |
| ENST00000506182 | SNX14    | 26.36 | 2.2152E-10 |
| ENST00000368690 | CHTOP    | 26.36 | 2.2388E-10 |
| ENST00000345358 | BAX      | 26.36 | 2.2388E-10 |
| ENST00000426907 | HUWE1    | 26.35 | 2.2152E-10 |
| ENST00000626748 | None     | 26.35 | 2.2152E-10 |
| ENST00000302392 | TMEM42   | 26.35 | 2.2152E-10 |
| ENST00000420940 | WDR48    | 26.35 | 2.2172E-10 |
| ENST00000550787 | TMEM19   | 26.35 | 2.2472E-10 |
| ENST00000329463 | DHX36    | 26.34 | 2.2388E-10 |
| ENST00000249442 | MTX2     | 26.34 | 2.2409E-10 |
| ENST00000533892 | SYTL2    | 26.33 | 2.2472E-10 |
| ENST00000342572 | CYBC1    | 26.32 | 2.2472E-10 |
| ENST00000392359 | CENPX    | 26.32 | 2.2472E-10 |
| ENST00000306704 | CENPX    | 26.32 | 2.2472E-10 |
| ENST00000548400 | MYL6     | 26.32 | 2.2472E-10 |
| ENST00000573763 | SERPINF1 | 26.32 | 2.2472E-10 |
| ENST00000586988 | DNMT1    | 26.32 | 2.2472E-10 |
| ENST00000547303 | DDIT3    | 26.32 | 2.2472E-10 |
| ENST00000500655 | TIFA     | 26.32 | 2.2472E-10 |
| ENST00000526361 | SPCS2    | 26.32 | 2.2485E-10 |
| ENST00000620248 | BCL10    | 26.32 | 2.2485E-10 |
| ENST00000392324 | RFXANK   | 26.32 | 2.2485E-10 |
| ENST00000391855 | GGPS1    | 26.31 | 3.0200E-10 |
| ENST00000502495 | SCLT1    | 26.31 | 2.2485E-10 |
| ENST00000507773 | SLC35B1  | 26.31 | 2.2485E-10 |
| ENST00000564404 | TRAPPC2L | 26.31 | 2.2485E-10 |
| ENST00000416967 | TXN2     | 26.31 | 2.2485E-10 |
| ENST00000396634 | HLA-A    | 26.30 | 2.2485E-10 |
| ENST00000458039 | RALBP1   | 26.30 | 2.2485E-10 |

|                 |          |       |            |
|-----------------|----------|-------|------------|
| ENST00000465650 | KCTD3    | 26.30 | 2.2485E-10 |
| ENST00000450599 | DDX5     | 26.30 | 2.2530E-10 |
| ENST00000331821 | RANBP1   | 26.30 | 2.2530E-10 |
| ENST00000414154 | SMIM19   | 26.29 | 3.0845E-10 |
| ENST00000479690 | WIPI2    | 26.29 | 2.2534E-10 |
| ENST00000540056 | MGST1    | 26.29 | 2.2534E-10 |
| ENST00000394701 | AIMP1    | 26.29 | 2.2534E-10 |
| ENST00000397614 | RNH1     | 26.29 | 2.2534E-10 |
| ENST00000618184 | None     | 26.29 | 2.2534E-10 |
| ENST00000257904 | CDK4     | 26.28 | 2.2683E-10 |
| ENST00000609777 | LSP1P4   | 26.28 | 2.2683E-10 |
| ENST00000418862 | SNX14    | 26.28 | 2.2683E-10 |
| ENST00000610832 | KLF4     | 26.28 | 2.2683E-10 |
| ENST00000497054 | MOB1A    | 26.27 | 2.2719E-10 |
| ENST00000547252 | SLC38A2  | 26.27 | 2.2719E-10 |
| ENST00000374741 | OXLD1    | 26.27 | 2.2719E-10 |
| ENST00000549384 | CORO1C   | 26.27 | 2.2719E-10 |
| ENST00000507503 | LUC7L3   | 26.27 | 2.2796E-10 |
| ENST00000473598 | LMNA     | 26.26 | 2.2796E-10 |
| ENST00000484996 | GLUL     | 26.26 | 2.2796E-10 |
| ENST00000519627 | EIF3E    | 26.26 | 2.2796E-10 |
| ENST00000596260 | PTGIR    | 26.26 | 2.2796E-10 |
| ENST00000496844 | THNSL2   | 26.26 | 2.4674E-10 |
| ENST00000539134 | RELT     | 26.26 | 2.4674E-10 |
| ENST00000425728 | JKAMP    | 26.26 | 3.1201E-10 |
| ENST00000312419 | POLD4    | 26.26 | 2.2796E-10 |
| ENST00000476436 | ACOT13   | 26.26 | 2.2796E-10 |
| ENST00000554943 | PPP4R3A  | 26.26 | 2.2796E-10 |
| ENST00000356187 | RNH1     | 26.26 | 2.2796E-10 |
| ENST00000454828 | TRIM22   | 26.26 | 2.2796E-10 |
| ENST00000617351 | None     | 26.26 | 2.2796E-10 |
| ENST00000506411 | GLRB     | 26.24 | 2.3166E-10 |
| ENST00000403658 | SH3YL1   | 26.24 | 2.3166E-10 |
| ENST00000484711 | TTLL12   | 26.24 | 2.3166E-10 |
| ENST00000590956 | PRELID3A | 26.24 | 2.3166E-10 |
| ENST00000503368 | UBE2K    | 26.24 | 2.3169E-10 |
| ENST00000560338 | EIF5     | 26.24 | 2.3169E-10 |
| ENST00000238651 | ACOT2    | 26.23 | 2.3357E-10 |
| ENST00000476658 | DFFA     | 26.23 | 2.3357E-10 |
| ENST00000512913 | SUB1     | 26.23 | 2.3357E-10 |
| ENST00000493900 | NAA50    | 26.22 | 2.3357E-10 |
| ENST00000544848 | H2AFJ    | 26.22 | 2.3526E-10 |
| ENST00000558985 | ANXA2    | 26.20 | 2.4703E-10 |
| ENST00000253457 | EMC8     | 26.19 | 2.4264E-10 |
| ENST00000422453 | CNBP     | 26.18 | 2.4403E-10 |

|                 |          |       |            |
|-----------------|----------|-------|------------|
| ENST00000575087 | ACTG1    | 26.18 | 2.4403E-10 |
| ENST00000454694 | OGFOD2   | 26.17 | 2.4703E-10 |
| ENST00000552635 | TMBIM6   | 26.17 | 2.4703E-10 |
| ENST00000529579 | RAB2A    | 26.17 | 2.4703E-10 |
| ENST00000467810 | TPR      | 26.17 | 2.4703E-10 |
| ENST00000411850 | TOM1     | 26.16 | 2.5007E-10 |
| ENST00000488542 | DMKN     | 26.14 | 2.5480E-10 |
| ENST00000311487 | HMGA1    | 26.14 | 2.5480E-10 |
| ENST00000570054 | None     | 26.14 | 2.5732E-10 |
| ENST00000591922 | RNMT     | 26.13 | 2.5732E-10 |
| ENST00000538057 | PTMS     | 26.13 | 2.5773E-10 |
| ENST00000549561 | MRPL42   | 26.12 | 2.5896E-10 |
| ENST00000540651 | ARF1     | 26.11 | 2.6139E-10 |
| ENST00000620430 | WASHC4   | 26.11 | 2.6139E-10 |
| ENST00000491523 | RPL13    | 26.11 | 2.6345E-10 |
| ENST00000357857 | CLN3     | 26.10 | 2.6388E-10 |
| ENST00000468318 | CNIH4    | 26.10 | 2.6434E-10 |
| ENST00000340006 | CSRP1    | 26.10 | 2.6474E-10 |
| ENST00000355151 | MRPL52   | 26.10 | 2.6474E-10 |
| ENST00000467911 | NCK1     | 26.10 | 2.6474E-10 |
| ENST00000591636 | ERCC1    | 26.09 | 2.6707E-10 |
| ENST00000448741 | HEBP2    | 26.09 | 2.6707E-10 |
| ENST00000398712 | SHARPIN  | 26.09 | 2.6707E-10 |
| ENST00000290949 | ATP6V0D1 | 26.08 | 2.6834E-10 |
| ENST00000586375 | RAD23A   | 26.08 | 2.6894E-10 |
| ENST00000420267 | MRPS25   | 26.08 | 2.6894E-10 |
| ENST00000550524 | TMEM19   | 26.07 | 2.7014E-10 |
| ENST00000571732 | YWHAE    | 26.07 | 2.7107E-10 |
| ENST00000616643 | None     | 26.07 | 2.7107E-10 |
| ENST00000456170 | ERI3     | 26.07 | 2.7110E-10 |
| ENST00000335174 | ANKRD37  | 26.07 | 2.7110E-10 |
| ENST00000555568 | NSFL1C   | 26.06 | 2.7146E-10 |
| ENST00000512419 | UCHL1    | 26.06 | 2.7376E-10 |
| ENST00000509889 | COPG1    | 26.06 | 2.7376E-10 |
| ENST00000637327 | ATP6AP2  | 26.06 | 2.7376E-10 |
| ENST00000436787 | WDR33    | 26.05 | 2.7414E-10 |
| ENST00000482504 | SH3GLB1  | 26.05 | 2.7443E-10 |
| ENST00000216194 | ADSL     | 26.05 | 2.7443E-10 |
| ENST00000596149 | CLPP     | 26.05 | 2.7443E-10 |
| ENST00000541233 | CD27     | 26.04 | 2.7741E-10 |
| ENST00000481386 | CD81     | 26.04 | 2.7741E-10 |
| ENST00000461997 | RHNO1    | 26.04 | 2.7741E-10 |
| ENST00000543709 | TAOK3    | 26.03 | 2.7741E-10 |
| ENST00000555324 | DDX24    | 26.03 | 2.7741E-10 |
| ENST00000627947 | None     | 26.03 | 2.7741E-10 |

|                 |            |       |            |
|-----------------|------------|-------|------------|
| ENST00000587727 | DNAJC7     | 26.03 | 2.7790E-10 |
| ENST00000549338 | SLC25A3    | 26.03 | 3.1061E-10 |
| ENST00000353555 | BSG        | 26.03 | 2.7893E-10 |
| ENST00000255688 | PLAAT4     | 26.03 | 2.7893E-10 |
| ENST00000243112 | SMUG1      | 26.02 | 2.7927E-10 |
| ENST00000536588 | None       | 26.02 | 2.7927E-10 |
| ENST00000443913 | CTSK       | 26.01 | 2.8421E-10 |
| ENST00000620860 | EIF2B3     | 26.01 | 2.8421E-10 |
| ENST00000250124 | MPDU1      | 26.01 | 3.8684E-10 |
| ENST00000344085 | ZNF880     | 26.00 | 2.8483E-10 |
| ENST00000446293 | BSDC1      | 26.00 | 2.8506E-10 |
| ENST00000356936 | NCL        | 26.00 | 2.8483E-10 |
| ENST00000291839 | ST6GALNAC6 | 26.00 | 2.8483E-10 |
| ENST00000565833 | AMZ2P1     | 26.00 | 2.8483E-10 |
| ENST00000306049 | TEFM       | 26.00 | 2.8483E-10 |
| ENST00000452080 | TBRG1      | 26.00 | 2.8483E-10 |
| ENST00000486355 | DNAJC19    | 26.00 | 2.8483E-10 |
| ENST00000427250 | LSR        | 25.99 | 2.8609E-10 |
| ENST00000311534 | ISCA1      | 25.99 | 2.8752E-10 |
| ENST00000402468 | C1GALT1    | 25.99 | 2.8752E-10 |
| ENST00000495720 | RAB13      | 25.99 | 2.8752E-10 |
| ENST00000642236 | TOPBP1     | 25.99 | 2.8752E-10 |
| ENST00000378576 | MEST       | 25.98 | 2.8888E-10 |
| ENST00000577427 | SCO1       | 25.97 | 2.9306E-10 |
| ENST00000589631 | GIPC1      | 25.97 | 2.9306E-10 |
| ENST00000598955 | GPR108     | 25.97 | 2.9306E-10 |
| ENST00000418289 | FASTKD2    | 25.96 | 2.9410E-10 |
| ENST00000219542 | METRNL     | 25.96 | 2.9410E-10 |
| ENST00000536657 | WASF2      | 25.95 | 2.9671E-10 |
| ENST00000442805 | RALY       | 25.95 | 2.9884E-10 |
| ENST00000557670 | TMED10     | 25.95 | 2.9888E-10 |
| ENST00000560585 | GCNT3      | 25.94 | 3.0062E-10 |
| ENST00000494131 | CYB5A      | 25.94 | 3.0216E-10 |
| ENST00000260359 | NUSAP1     | 25.93 | 3.0275E-10 |
| ENST00000294489 | PDPN       | 25.93 | 3.0565E-10 |
| ENST00000557658 | VIPAS39    | 25.92 | 3.0643E-10 |
| ENST00000597551 | FLT3LG     | 25.92 | 3.0779E-10 |
| ENST00000493356 | PFDN4      | 25.91 | 3.0845E-10 |
| ENST00000596435 | FLT3LG     | 25.91 | 3.0845E-10 |
| ENST00000596975 | FCGRT      | 25.91 | 3.0845E-10 |
| ENST00000422285 | PDHA1      | 25.91 | 3.1647E-10 |
| ENST00000428260 | ZNF646     | 25.91 | 3.1647E-10 |
| ENST00000246337 | UROD       | 25.91 | 3.0845E-10 |
| ENST00000567648 | VAC14      | 25.91 | 3.0845E-10 |
| ENST00000502897 | SUB1       | 25.91 | 3.0845E-10 |



|                 |          |       |            |
|-----------------|----------|-------|------------|
| ENST00000651860 | LAMA4    | 25.91 | 3.0845E-10 |
| ENST00000254878 | RIDA     | 25.91 | 3.0845E-10 |
| ENST00000634702 | MAP4K4   | 25.90 | 3.0845E-10 |
| ENST00000482094 | MUTYH    | 25.90 | 3.0845E-10 |
| ENST00000616120 | NBPF14   | 25.90 | 3.0845E-10 |
| ENST00000394817 | SIL1     | 25.90 | 3.0845E-10 |
| ENST00000457974 | GYS1     | 25.90 | 3.0860E-10 |
| ENST00000582475 | SNRPD1   | 25.89 | 3.1061E-10 |
| ENST00000588776 | CAPS     | 25.89 | 3.1061E-10 |
| ENST00000398033 | TMBIM4   | 25.89 | 3.1061E-10 |
| ENST00000531339 | SIPA1    | 25.89 | 3.1061E-10 |
| ENST00000366654 | FAM89A   | 25.89 | 3.1061E-10 |
| ENST00000378990 | CAP2     | 25.89 | 3.1061E-10 |
| ENST00000599537 | NOSIP    | 25.88 | 3.1403E-10 |
| ENST00000535139 | SPX      | 25.87 | 3.1770E-10 |
| ENST00000573251 | RSL1D1   | 25.87 | 3.1770E-10 |
| ENST00000640289 | None     | 25.87 | 3.1819E-10 |
| ENST00000530628 | CDKN2A   | 25.87 | 3.1770E-10 |
| ENST00000554736 | GNG2     | 25.87 | 3.1770E-10 |
| ENST00000616502 | EPHB4    | 25.85 | 3.2238E-10 |
| ENST00000263354 | NAPA     | 25.84 | 3.5466E-10 |
| ENST00000534028 | SLC25A45 | 25.84 | 3.2668E-10 |
| ENST00000651658 | RAD50    | 25.84 | 3.2668E-10 |
| ENST00000369905 | ACTR1A   | 25.83 | 3.2994E-10 |
| ENST00000485487 | REV1     | 25.82 | 3.3198E-10 |
| ENST00000409453 | DYNC1I2  | 25.82 | 3.3198E-10 |
| ENST00000485435 | SURF4    | 25.82 | 3.3198E-10 |
| ENST00000626303 | None     | 25.82 | 3.3198E-10 |
| ENST00000483839 | GTPBP4   | 25.82 | 3.3856E-10 |
| ENST00000500777 | SEC31A   | 25.82 | 3.3358E-10 |
| ENST00000555597 | RNASE4   | 25.82 | 3.3358E-10 |
| ENST00000413379 | SAE1     | 25.81 | 3.3592E-10 |
| ENST00000532339 | CD44     | 25.80 | 3.3897E-10 |
| ENST00000477783 | TCEA2    | 25.80 | 3.4015E-10 |
| ENST00000419828 | GNB2     | 25.80 | 3.5239E-10 |
| ENST00000530428 | MTCH2    | 25.78 | 3.4674E-10 |
| ENST00000584350 | AMZ2     | 25.78 | 3.4674E-10 |
| ENST00000642838 | None     | 25.78 | 3.4674E-10 |
| ENST00000465584 | NKTR     | 25.78 | 3.4717E-10 |
| ENST00000315491 | TUBB3    | 25.78 | 3.4674E-10 |
| ENST00000439780 | UBE2F    | 25.78 | 3.4674E-10 |
| ENST00000538107 | MFAP5    | 25.78 | 3.4674E-10 |
| ENST00000560682 | SLTM     | 25.78 | 3.4719E-10 |
| ENST00000562125 | TRAPPC2L | 25.77 | 3.4719E-10 |
| ENST00000397514 | UBE2I    | 25.77 | 3.4719E-10 |

|                 |              |       |            |
|-----------------|--------------|-------|------------|
| ENST00000518918 | MRPL13       | 25.77 | 3.4719E-10 |
| ENST00000407461 | POLR3H       | 25.77 | 3.4719E-10 |
| ENST00000591583 | COASY        | 25.77 | 3.4719E-10 |
| ENST00000446041 | SLC25A36     | 25.77 | 3.4719E-10 |
| ENST00000586760 | CALR         | 25.76 | 3.4977E-10 |
| ENST00000594092 | VRK3         | 25.76 | 5.2455E-10 |
| ENST00000549992 | NUDT4        | 25.76 | 3.5182E-10 |
| ENST00000572250 | RABEP1       | 25.76 | 3.5204E-10 |
| ENST00000566835 | MLST8        | 25.75 | 3.5283E-10 |
| ENST00000495267 | KMT2E        | 25.75 | 3.5406E-10 |
| ENST00000588118 | DNMT1        | 25.75 | 4.3538E-10 |
| ENST00000509022 | FAM200B      | 25.74 | 3.5639E-10 |
| ENST00000308153 | H2AZ2        | 25.73 | 3.6196E-10 |
| ENST00000614237 | SENP3-EIF4A1 | 25.73 | 3.6196E-10 |
| ENST00000233627 | NDUFS7       | 25.73 | 3.6237E-10 |
| ENST00000559412 | MYO1E        | 25.73 | 3.6237E-10 |
| ENST00000454220 | PPP2R1A      | 25.72 | 3.6526E-10 |
| ENST00000460327 | DMKN         | 25.72 | 3.6526E-10 |
| ENST00000503608 | SNX14        | 25.72 | 3.6526E-10 |
| ENST00000216330 | FKBP3        | 25.71 | 3.6537E-10 |
| ENST00000538396 | MCRIP1       | 25.71 | 3.6537E-10 |
| ENST00000673369 | None         | 25.71 | 3.6537E-10 |
| ENST00000426563 | DYNLT2B      | 25.71 | 3.6599E-10 |
| ENST00000492044 | AZI2         | 25.71 | 3.6599E-10 |
| ENST00000368301 | LMNA         | 25.71 | 3.6667E-10 |
| ENST00000647567 | MED13L       | 25.71 | 3.6667E-10 |
| ENST00000644527 | SMARCE1      | 25.70 | 3.6793E-10 |
| ENST00000602561 | RPL7L1       | 25.70 | 3.6923E-10 |
| ENST00000526267 | EIF3M        | 25.70 | 3.7998E-10 |
| ENST00000496858 | PRKAB2       | 25.69 | 3.7502E-10 |
| ENST00000322008 | CD151        | 25.69 | 3.7502E-10 |
| ENST00000347519 | CHMP4A       | 25.69 | 3.7502E-10 |
| ENST00000645308 | None         | 25.69 | 3.7502E-10 |
| ENST00000536981 | SLC3A2       | 25.68 | 3.7760E-10 |
| ENST00000458574 | MPC2         | 25.68 | 3.7760E-10 |
| ENST00000508218 | LUC7L3       | 25.68 | 3.7760E-10 |
| ENST00000554437 | SCFD1        | 25.68 | 3.7760E-10 |
| ENST00000368322 | RIT1         | 25.67 | 3.7760E-10 |
| ENST00000421687 | PABPC4       | 25.67 | 3.7760E-10 |
| ENST00000510934 | UBE2K        | 25.67 | 3.7760E-10 |
| ENST00000527794 | SYTL2        | 25.67 | 3.7760E-10 |
| ENST00000356950 | H2BC12       | 25.67 | 3.7860E-10 |
| ENST00000398409 | CST3         | 25.67 | 3.7860E-10 |
| ENST00000426541 | RBSN         | 25.66 | 3.7998E-10 |
| ENST00000466371 | FTSJ1        | 25.66 | 3.7998E-10 |

|                 |          |       |            |
|-----------------|----------|-------|------------|
| ENST00000518793 | PIEZO1   | 25.66 | 3.7998E-10 |
| ENST00000375779 | CLIC1    | 25.65 | 3.7998E-10 |
| ENST00000383404 | None     | 25.65 | 3.7998E-10 |
| ENST00000423055 | None     | 25.65 | 3.7998E-10 |
| ENST00000423143 | None     | 25.65 | 3.7998E-10 |
| ENST00000423804 | None     | 25.65 | 3.7998E-10 |
| ENST00000434202 | None     | 25.65 | 3.7998E-10 |
| ENST00000438708 | None     | 25.65 | 3.7998E-10 |
| ENST00000498219 | HPS1     | 25.65 | 3.7998E-10 |
| ENST00000263688 | SUCO     | 25.65 | 3.7998E-10 |
| ENST00000392659 | MRPL47   | 25.65 | 3.7998E-10 |
| ENST00000495054 | MTMR11   | 25.65 | 3.7998E-10 |
| ENST00000559602 | ETFA     | 25.65 | 3.7998E-10 |
| ENST00000260502 | BCAR3    | 25.65 | 3.8181E-10 |
| ENST00000410071 | EVA1A    | 25.65 | 3.8181E-10 |
| ENST00000533729 | ARL2     | 25.65 | 3.8181E-10 |
| ENST00000538636 | RHNO1    | 25.62 | 3.9283E-10 |
| ENST00000539107 | CCDC91   | 25.62 | 3.9283E-10 |
| ENST00000585693 | DNAJC7   | 25.62 | 3.9283E-10 |
| ENST00000590238 | APBA3    | 25.62 | 4.1867E-10 |
| ENST00000448364 | RALY     | 25.62 | 4.1867E-10 |
| ENST00000540688 | NDUFA9   | 25.62 | 3.9283E-10 |
| ENST00000477985 | BOD1     | 25.62 | 3.9405E-10 |
| ENST00000395418 | IFT20    | 25.61 | 4.0992E-10 |
| ENST00000543979 | None     | 25.60 | 4.0156E-10 |
| ENST00000372484 | CTSA     | 25.60 | 4.0156E-10 |
| ENST00000396682 | RPA3     | 25.60 | 4.0156E-10 |
| ENST00000631280 | THOC1    | 25.60 | 4.0156E-10 |
| ENST00000592273 | TRIR     | 25.60 | 4.0156E-10 |
| ENST00000621097 | RFC2     | 25.60 | 4.0385E-10 |
| ENST00000368949 | CERS2    | 25.59 | 4.0538E-10 |
| ENST00000532577 | ZNF143   | 25.59 | 4.0538E-10 |
| ENST00000461234 | ADAM15   | 25.58 | 4.0863E-10 |
| ENST00000518696 | MRPL13   | 25.58 | 4.0863E-10 |
| ENST00000330188 | TPM3     | 25.58 | 4.3423E-10 |
| ENST00000618438 | FHL1     | 25.58 | 4.0923E-10 |
| ENST00000652033 | TPP2     | 25.57 | 4.1178E-10 |
| ENST00000397665 | METTTL26 | 25.57 | 4.1299E-10 |
| ENST00000514121 | SPOP     | 25.57 | 4.1299E-10 |
| ENST00000361871 | MSRB1    | 25.55 | 4.1935E-10 |
| ENST00000451119 | ZNF219   | 25.55 | 4.1935E-10 |
| ENST00000395969 | VPS41    | 25.54 | 4.2308E-10 |
| ENST00000514685 | SMUG1    | 25.54 | 4.2308E-10 |
| ENST00000407025 | PPP1R7   | 25.54 | 4.2308E-10 |
| ENST00000460807 | NKTR     | 25.54 | 5.3210E-10 |

|                 |           |       |            |
|-----------------|-----------|-------|------------|
| ENST00000637763 | SUPT3H    | 25.54 | 4.2759E-10 |
| ENST00000553360 | KTN1      | 25.53 | 4.2988E-10 |
| ENST00000333552 | RALY      | 25.53 | 4.2988E-10 |
| ENST00000472253 | PPP2CA    | 25.53 | 4.3383E-10 |
| ENST00000625194 | ADSL      | 25.53 | 4.3383E-10 |
| ENST00000495958 | CAAP1     | 25.53 | 4.9979E-10 |
| ENST00000581858 | FLII      | 25.51 | 4.3611E-10 |
| ENST00000640412 | None      | 25.51 | 4.3611E-10 |
| ENST00000350771 | H2AZ2     | 25.51 | 4.3611E-10 |
| ENST00000517403 | PABPC1    | 25.51 | 4.3611E-10 |
| ENST00000615219 | None      | 25.51 | 4.3611E-10 |
| ENST00000352231 | LGALS8    | 25.51 | 4.3729E-10 |
| ENST00000461665 | MDH2      | 25.51 | 4.3729E-10 |
| ENST00000633112 | None      | 25.51 | 4.3729E-10 |
| ENST00000393193 | NME1-NME2 | 25.51 | 4.3729E-10 |
| ENST00000392508 | DYNLL1    | 25.50 | 4.3794E-10 |
| ENST00000393300 | OLFML3    | 25.50 | 4.3794E-10 |
| ENST00000525807 | CTSH      | 25.50 | 4.3794E-10 |
| ENST00000269298 | SAT2      | 25.50 | 4.3966E-10 |
| ENST00000521569 | SPARC     | 25.49 | 4.4361E-10 |
| ENST00000537368 | GTF2H3    | 25.49 | 4.4361E-10 |
| ENST00000587950 | MICOS13   | 25.49 | 4.4361E-10 |
| ENST00000382464 | HEATR5A   | 25.49 | 4.4473E-10 |
| ENST00000422978 | None      | 25.48 | 4.4473E-10 |
| ENST00000423382 | None      | 25.48 | 4.4473E-10 |
| ENST00000229725 | NEU1      | 25.48 | 4.4473E-10 |
| ENST00000437432 | NEU1      | 25.48 | 4.4473E-10 |
| ENST00000434496 | NEU1      | 25.48 | 4.4473E-10 |
| ENST00000373408 | CCDC167   | 25.48 | 4.4582E-10 |
| ENST00000492398 | PLK3      | 25.48 | 4.4582E-10 |
| ENST00000420576 | GSPT1     | 25.47 | 4.5183E-10 |
| ENST00000370092 | IDH3G     | 25.46 | 4.5183E-10 |
| ENST00000321926 | CLIC2     | 25.46 | 4.5183E-10 |
| ENST00000441340 | PLEKHO1   | 25.46 | 4.5183E-10 |
| ENST00000452913 | CIBAR1    | 25.46 | 4.5183E-10 |
| ENST00000457404 | PPA2      | 25.46 | 4.5183E-10 |
| ENST00000547832 | TMBIM6    | 25.46 | 4.5183E-10 |
| ENST00000617660 | None      | 25.46 | 4.5183E-10 |
| ENST00000548802 | None      | 25.46 | 4.5183E-10 |
| ENST00000400770 | DTYMK     | 25.45 | 4.5670E-10 |
| ENST00000397914 | CYB5A     | 25.43 | 4.6756E-10 |
| ENST00000484799 | SMC4      | 25.43 | 4.6756E-10 |
| ENST00000491426 | PDE4DIP   | 25.43 | 4.7158E-10 |
| ENST00000555012 | ATP6V1D   | 25.42 | 4.7531E-10 |
| ENST00000640458 | None      | 25.42 | 4.7531E-10 |

|                 |          |       |            |
|-----------------|----------|-------|------------|
| ENST00000357146 | PSMD12   | 25.41 | 5.7331E-10 |
| ENST00000261842 | AP4E1    | 25.41 | 4.8844E-10 |
| ENST00000571688 | LITAF    | 25.41 | 4.8844E-10 |
| ENST00000397817 | MPG      | 25.41 | 4.8844E-10 |
| ENST00000396064 | GTF2A2   | 25.41 | 4.8844E-10 |
| ENST00000602011 | SHKBP1   | 25.41 | 4.8844E-10 |
| ENST00000497556 | ATP13A1  | 25.40 | 6.8943E-10 |
| ENST00000474265 | FLII     | 25.39 | 4.8844E-10 |
| ENST00000522385 | PPP2CA   | 25.39 | 4.8844E-10 |
| ENST00000640241 | None     | 25.39 | 4.8844E-10 |
| ENST00000600791 | SHKBP1   | 25.39 | 4.8844E-10 |
| ENST00000229390 | SRSF9    | 25.39 | 7.0028E-10 |
| ENST00000450808 | CMPK1    | 25.39 | 4.9138E-10 |
| ENST00000601800 | FLT3LG   | 25.38 | 4.9421E-10 |
| ENST00000168216 | HSD17B10 | 25.38 | 7.0124E-10 |
| ENST00000392531 | CRIP1    | 25.37 | 5.6733E-10 |
| ENST00000428336 | TSPO     | 25.37 | 5.6733E-10 |
| ENST00000615321 | RSBN1    | 25.37 | 5.6733E-10 |
| ENST00000591645 | TPM4     | 25.37 | 7.0935E-10 |
| ENST00000619362 | None     | 25.36 | 5.0713E-10 |
| ENST00000529543 | TBRG1    | 25.35 | 5.1567E-10 |
| ENST00000454094 | ABCF1    | 25.34 | 5.1838E-10 |
| ENST00000421608 | ABCF1    | 25.34 | 5.1838E-10 |
| ENST00000556840 | MRPL52   | 25.34 | 5.1838E-10 |
| ENST00000350697 | SEC13    | 25.34 | 5.1838E-10 |
| ENST00000521877 | PIEZO1   | 25.33 | 5.2795E-10 |
| ENST00000322428 | MAF1     | 25.32 | 5.3210E-10 |
| ENST00000597396 | SHKBP1   | 25.32 | 5.3313E-10 |
| ENST00000614868 | CWC25    | 25.32 | 5.3031E-10 |
| ENST00000519120 | MRPS28   | 25.32 | 5.3031E-10 |
| ENST00000612655 | POLR2E   | 25.32 | 5.3031E-10 |
| ENST00000437355 | PSPH     | 25.32 | 5.3031E-10 |
| ENST00000395566 | MDK      | 25.32 | 7.0028E-10 |
| ENST00000493695 | SMC4     | 25.32 | 5.3124E-10 |
| ENST00000533178 | MUTYH    | 25.32 | 5.3124E-10 |
| ENST00000555729 | AHSA1    | 25.31 | 5.3313E-10 |
| ENST00000540249 | PDHA1    | 25.31 | 6.9291E-10 |
| ENST00000308418 | RNASEH2C | 25.31 | 5.3313E-10 |
| ENST00000395353 | MVP      | 25.31 | 5.3313E-10 |
| ENST00000600615 | STRN4    | 25.31 | 5.3313E-10 |
| ENST00000316052 | EXOSC4   | 25.30 | 5.4119E-10 |
| ENST00000479269 | DNAJC19  | 25.30 | 5.4119E-10 |
| ENST00000619573 | GGNBP2   | 25.30 | 5.4119E-10 |
| ENST00000633649 | None     | 25.30 | 5.4119E-10 |
| ENST00000493278 | CALU     | 25.30 | 5.4699E-10 |

|                 |          |       |            |
|-----------------|----------|-------|------------|
| ENST00000532993 | ARHGEF12 | 25.29 | 5.4130E-10 |
| ENST00000617672 | None     | 25.29 | 5.4130E-10 |
| ENST00000423990 | CIBAR1   | 25.28 | 5.5216E-10 |
| ENST00000479237 | SH3GLB2  | 25.28 | 5.5216E-10 |
| ENST00000416469 | SMIM19   | 25.27 | 5.7659E-10 |
| ENST00000455667 | PCBP2    | 25.27 | 5.7659E-10 |
| ENST00000473900 | NENF     | 25.27 | 5.7659E-10 |
| ENST00000634591 | SEPTIN7  | 25.27 | 5.7659E-10 |
| ENST00000331808 | DEXI     | 25.27 | 5.5607E-10 |
| ENST00000421063 | PHYHD1   | 25.27 | 5.5607E-10 |
| ENST00000519100 | PABPC1   | 25.27 | 5.5607E-10 |
| ENST00000647721 | ITPRIP   | 25.27 | 5.5607E-10 |
| ENST00000394555 | EFEMP1   | 25.25 | 5.6733E-10 |
| ENST00000578734 | RAB31    | 25.25 | 5.6733E-10 |
| ENST00000309212 | MXRA8    | 25.25 | 7.4372E-10 |
| ENST00000369509 | VANGL1   | 25.25 | 5.6733E-10 |
| ENST00000394788 | CD36     | 25.25 | 5.6733E-10 |
| ENST00000395711 | SDAD1    | 25.25 | 5.6733E-10 |
| ENST00000667857 | KMT2E    | 25.25 | 5.6733E-10 |
| ENST00000461447 | GLUL     | 25.24 | 5.7331E-10 |
| ENST00000527158 | SNRNP35  | 25.24 | 5.7331E-10 |
| ENST00000214869 | TMED1    | 25.24 | 5.7331E-10 |
| ENST00000510207 | AIMP1    | 25.23 | 5.8818E-10 |
| ENST00000485757 | RSPO3    | 25.23 | 5.8279E-10 |
| ENST00000546840 | None     | 25.23 | 5.8279E-10 |
| ENST00000391758 | TFPT     | 25.23 | 5.7331E-10 |
| ENST00000611344 | TFPT     | 25.23 | 5.7331E-10 |
| ENST00000361036 | GPAA1    | 25.23 | 7.6035E-10 |
| ENST00000249842 | ISLR     | 25.23 | 5.7623E-10 |
| ENST00000671810 | ISLR     | 25.23 | 5.7623E-10 |
| ENST00000496672 | DNTTIP2  | 25.22 | 5.7633E-10 |
| ENST00000497666 | DCTN1    | 25.22 | 5.7633E-10 |
| ENST00000393611 | RAB24    | 25.22 | 5.7633E-10 |
| ENST00000651235 | MRM2     | 25.22 | 5.7659E-10 |
| ENST00000423617 | NBDY     | 25.22 | 5.7659E-10 |
| ENST00000463624 | WDR82    | 25.22 | 5.7659E-10 |
| ENST00000407360 | RFXANK   | 25.22 | 7.7874E-10 |
| ENST00000216479 | AHSA1    | 25.22 | 5.7725E-10 |
| ENST00000295685 | ARPC2    | 25.22 | 5.7725E-10 |
| ENST00000484646 | ATRAID   | 25.21 | 5.7981E-10 |
| ENST00000651945 | UBE2W    | 25.21 | 7.7894E-10 |
| ENST00000472168 | PIEZO1   | 25.21 | 7.7894E-10 |
| ENST00000566233 | RAB11A   | 25.21 | 7.7894E-10 |
| ENST00000658489 | TPM4     | 25.21 | 7.7894E-10 |
| ENST00000414401 | CECR7    | 25.21 | 5.8115E-10 |

|                 |          |       |            |
|-----------------|----------|-------|------------|
| ENST00000547698 | LMBR1L   | 25.21 | 5.8115E-10 |
| ENST00000588841 | C19orf53 | 25.21 | 5.8115E-10 |
| ENST00000518157 | SBSN     | 25.20 | 5.8279E-10 |
| ENST00000578996 | CDK5RAP3 | 25.20 | 5.8279E-10 |
| ENST00000449323 | RPS27A   | 25.20 | 5.8524E-10 |
| ENST00000357179 | TOP3B    | 25.19 | 5.8834E-10 |
| ENST00000477184 | RASA4B   | 25.19 | 5.8834E-10 |
| ENST00000227520 | CCDC86   | 25.18 | 6.0317E-10 |
| ENST00000457596 | UPP1     | 25.17 | 6.0318E-10 |
| ENST00000550189 | NFYB     | 25.17 | 6.0318E-10 |
| ENST00000593786 | NCOA6    | 25.17 | 6.0318E-10 |
| ENST00000616054 | CCL18    | 25.17 | 6.0579E-10 |
| ENST00000530584 | POLD4    | 25.17 | 6.0579E-10 |
| ENST00000409203 | SGO2     | 25.16 | 6.0847E-10 |
| ENST00000480975 | GNAS     | 25.16 | 6.0847E-10 |
| ENST00000417700 | RMDN2    | 25.16 | 6.1014E-10 |
| ENST00000331803 | UPP1     | 25.16 | 6.1014E-10 |
| ENST00000425675 | ISOC2    | 25.15 | 6.1292E-10 |
| ENST00000509589 | CYSTM1   | 25.15 | 6.1244E-10 |
| ENST00000485486 | FTSJ1    | 25.15 | 6.1244E-10 |
| ENST00000492182 | XPO1     | 25.15 | 6.1244E-10 |
| ENST00000408998 | WDR33    | 25.14 | 6.2784E-10 |
| ENST00000425851 | SECISBP2 | 25.14 | 6.2784E-10 |
| ENST00000461431 | CCDC80   | 25.14 | 6.2784E-10 |
| ENST00000215587 | POLR2E   | 25.13 | 7.1304E-10 |
| ENST00000491099 | EPC2     | 25.13 | 6.3112E-10 |
| ENST00000497755 | CLIC4    | 25.13 | 6.3112E-10 |
| ENST00000529115 | RNH1     | 25.12 | 6.3487E-10 |
| ENST00000632667 | None     | 25.12 | 6.3487E-10 |
| ENST00000377488 | PARK7    | 25.12 | 7.1797E-10 |
| ENST00000520796 | CLU      | 25.12 | 7.1797E-10 |
| ENST00000612988 | None     | 25.11 | 6.4232E-10 |
| ENST00000618533 | RPP40    | 25.11 | 6.4232E-10 |
| ENST00000636766 | None     | 25.11 | 6.4232E-10 |
| ENST00000484375 | ARPC1B   | 25.11 | 6.4531E-10 |
| ENST00000586564 | C19orf25 | 25.11 | 6.4531E-10 |
| ENST00000635175 | SEPTIN7  | 25.11 | 6.4531E-10 |
| ENST00000383391 | LSM2     | 25.10 | 6.4948E-10 |
| ENST00000432122 | LSM2     | 25.10 | 6.4948E-10 |
| ENST00000434125 | LSM2     | 25.10 | 6.4948E-10 |
| ENST00000424975 | LSM2     | 25.10 | 6.4948E-10 |
| ENST00000455705 | LSM2     | 25.10 | 6.4948E-10 |
| ENST00000532047 | ARL14EP  | 25.10 | 6.4948E-10 |
| ENST00000492709 | HM13     | 25.09 | 9.3925E-10 |
| ENST00000462166 | TPRKB    | 25.09 | 6.5495E-10 |

|                 |             |       |            |
|-----------------|-------------|-------|------------|
| ENST00000517501 | NUDCD2      | 25.09 | 6.5495E-10 |
| ENST00000475534 | RRP1        | 25.09 | 6.6033E-10 |
| ENST00000474709 | ADAM15      | 25.08 | 6.5879E-10 |
| ENST00000545616 | RNF24       | 25.08 | 6.6437E-10 |
| ENST00000527163 | BSDC1       | 25.06 | 6.7608E-10 |
| ENST00000547281 | CDK4        | 25.06 | 6.8064E-10 |
| ENST00000612493 | NCOA6       | 25.06 | 6.8064E-10 |
| ENST00000346867 | TAC1        | 25.05 | 6.8325E-10 |
| ENST00000486199 | PHF20L1     | 25.05 | 6.8325E-10 |
| ENST00000505719 | MRPS18C     | 25.05 | 6.8325E-10 |
| ENST00000403050 | PHF14       | 25.04 | 6.8654E-10 |
| ENST00000467606 | ITGB1BP1    | 25.04 | 6.8654E-10 |
| ENST00000524553 | CFL1        | 25.04 | 6.8654E-10 |
| ENST00000429243 | PRR13       | 25.04 | 6.8654E-10 |
| ENST00000440277 | PHB2        | 25.04 | 6.8654E-10 |
| ENST00000554969 | HNRNPC      | 25.04 | 6.8654E-10 |
| ENST00000577906 | SNRPD1      | 25.04 | 6.8654E-10 |
| ENST00000417101 | ACTB        | 25.04 | 6.9247E-10 |
| ENST00000356714 | NUDT1       | 25.03 | 6.9465E-10 |
| ENST00000487865 | NDFIP2      | 25.03 | 6.9465E-10 |
| ENST00000460439 | ANXA4       | 25.02 | 7.2194E-10 |
| ENST00000565031 | NDUFB10     | 25.02 | 7.0028E-10 |
| ENST00000589165 | ERCC1       | 25.02 | 7.0028E-10 |
| ENST00000611509 | None        | 25.02 | 7.0028E-10 |
| ENST00000651529 | LAMA4       | 25.02 | 7.0028E-10 |
| ENST00000438045 | PEX1        | 25.02 | 7.0028E-10 |
| ENST00000510920 | FAM200B     | 25.02 | 7.0028E-10 |
| ENST00000505186 | TNIP2       | 25.02 | 7.0028E-10 |
| ENST00000554840 | GNG2        | 25.02 | 7.0028E-10 |
| ENST00000569417 | MLST8       | 25.02 | 7.0028E-10 |
| ENST00000595765 | CYTH2       | 25.01 | 7.0445E-10 |
| ENST00000487078 | AGBL5       | 25.01 | 7.0524E-10 |
| ENST00000636836 | UROD        | 25.01 | 7.0524E-10 |
| ENST00000648915 | EIF2B5      | 25.00 | 7.4372E-10 |
| ENST00000517946 | CAAP1       | 25.00 | 7.4372E-10 |
| ENST00000551823 | CHURC1-FNTB | 25.00 | 7.4372E-10 |
| ENST00000620897 | CYREN       | 25.00 | 1.0490E-09 |
| ENST00000424167 | MDH2        | 25.00 | 7.1304E-10 |
| ENST00000443409 | DGCR6L      | 25.00 | 7.1304E-10 |
| ENST00000495224 | RBM34       | 25.00 | 7.1304E-10 |
| ENST00000462686 | NMNAT1      | 24.99 | 7.1709E-10 |
| ENST00000521693 | LAMA4       | 24.99 | 7.8487E-10 |
| ENST00000366676 | None        | 24.99 | 7.1950E-10 |
| ENST00000576353 | SNF8        | 24.99 | 7.1950E-10 |
| ENST00000369721 | ATP5PB      | 24.98 | 1.0775E-09 |



|                 |          |       |            |
|-----------------|----------|-------|------------|
| ENST00000315144 | FLAD1    | 24.97 | 7.3312E-10 |
| ENST00000519511 | STC2     | 24.97 | 7.3312E-10 |
| ENST00000520337 | CTHRC1   | 24.97 | 7.3656E-10 |
| ENST00000216037 | XBP1     | 24.97 | 7.3656E-10 |
| ENST00000457309 | YWHAZ    | 24.97 | 1.0897E-09 |
| ENST00000585900 | HMG20B   | 24.96 | 7.4372E-10 |
| ENST00000268676 | DEF8     | 24.95 | 7.4372E-10 |
| ENST00000402580 | XRCC6    | 24.95 | 7.4372E-10 |
| ENST00000461349 | C9orf78  | 24.95 | 7.4372E-10 |
| ENST00000470181 | DPM2     | 24.95 | 7.4372E-10 |
| ENST00000618135 | TSEN34   | 24.95 | 7.4372E-10 |
| ENST00000612393 | TSEN34   | 24.95 | 7.4372E-10 |
| ENST00000226105 | RANGRF   | 24.94 | 1.1143E-09 |
| ENST00000307712 | SEC23A   | 24.94 | 1.1143E-09 |
| ENST00000425441 | CCDC12   | 24.94 | 7.5731E-10 |
| ENST00000514089 | SNF8     | 24.94 | 7.5731E-10 |
| ENST00000571476 | DERL2    | 24.94 | 7.5731E-10 |
| ENST00000259632 | DCTN3    | 24.93 | 1.1255E-09 |
| ENST00000557126 | CAMTA1   | 24.93 | 7.6350E-10 |
| ENST00000560458 | BNIP2    | 24.93 | 7.6350E-10 |
| ENST00000312475 | MRPL46   | 24.92 | 7.6598E-10 |
| ENST00000477948 | NTNG1    | 24.92 | 7.6598E-10 |
| ENST00000515770 | DEK      | 24.92 | 7.6598E-10 |
| ENST00000634938 | MADD     | 24.92 | 7.6598E-10 |
| ENST00000424358 | MMP24OS  | 24.92 | 7.6872E-10 |
| ENST00000463292 | DMKN     | 24.92 | 7.6872E-10 |
| ENST00000493959 | SENP6    | 24.92 | 7.6872E-10 |
| ENST00000520484 | ENDOV    | 24.92 | 7.6872E-10 |
| ENST00000331728 | LIMK2    | 24.92 | 8.0250E-10 |
| ENST00000458600 | SLC25A17 | 24.92 | 8.0250E-10 |
| ENST00000474315 | IDH3B    | 24.92 | 8.0250E-10 |
| ENST00000540558 | RHBDL2   | 24.92 | 8.0250E-10 |
| ENST00000567887 | MACF1    | 24.90 | 7.8069E-10 |
| ENST00000361611 | PSMB5    | 24.89 | 8.0250E-10 |
| ENST00000510500 | CAST     | 24.89 | 8.0250E-10 |
| ENST00000556322 | LGALS3   | 24.89 | 8.0250E-10 |
| ENST00000372542 | SNX21    | 24.88 | 8.0250E-10 |
| ENST00000483859 | SENP6    | 24.88 | 8.0250E-10 |
| ENST00000396394 | PSMA1    | 24.88 | 8.0654E-10 |
| ENST00000540962 | PSMD9    | 24.88 | 8.0654E-10 |
| ENST00000551396 | MRPL42   | 24.88 | 8.0654E-10 |
| ENST00000436900 | DAZAP2   | 24.87 | 1.0173E-09 |
| ENST00000541873 | RFXANK   | 24.86 | 9.8285E-10 |
| ENST00000543227 | ZNF611   | 24.86 | 9.8285E-10 |
| ENST00000571971 | DERL2    | 24.86 | 9.8285E-10 |

|                 |           |       |            |
|-----------------|-----------|-------|------------|
| ENST00000586242 | GRN       | 24.86 | 9.8285E-10 |
| ENST00000539687 | SPARC     | 24.86 | 8.1889E-10 |
| ENST00000548118 | ATF7      | 24.86 | 8.1889E-10 |
| ENST00000558644 | AKAP13    | 24.86 | 8.1889E-10 |
| ENST00000507614 | TIMM8B    | 24.85 | 9.9914E-10 |
| ENST00000563415 | CDIPT     | 24.85 | 8.2471E-10 |
| ENST00000589686 | CIRBP     | 24.85 | 8.4124E-10 |
| ENST00000412806 | SH3BP5    | 24.85 | 1.2301E-09 |
| ENST00000391918 | CALM3     | 24.84 | 8.3412E-10 |
| ENST00000484501 | IL20RB    | 24.84 | 8.3412E-10 |
| ENST00000409332 | UBE2F     | 24.84 | 8.3412E-10 |
| ENST00000477172 | MAD1L1    | 24.84 | 8.3412E-10 |
| ENST00000596605 | CLPP      | 24.84 | 8.3412E-10 |
| ENST00000538217 | TMBIM4    | 24.84 | 8.3988E-10 |
| ENST00000542103 | None      | 24.83 | 8.5646E-10 |
| ENST00000326092 | RPL21     | 24.83 | 1.2502E-09 |
| ENST00000427685 | C19orf25  | 24.83 | 1.0395E-09 |
| ENST00000252029 | TYMP      | 24.82 | 8.5130E-10 |
| ENST00000367439 | GLRX2     | 24.82 | 1.2661E-09 |
| ENST00000637551 | None      | 24.81 | 8.6208E-10 |
| ENST00000652485 | RAD50     | 24.81 | 8.6208E-10 |
| ENST00000633401 | AATF      | 24.81 | 8.8838E-10 |
| ENST00000423591 | FAM120AOS | 24.81 | 8.8838E-10 |
| ENST00000610798 | AATF      | 24.81 | 8.8838E-10 |
| ENST00000498107 | SSBP1     | 24.80 | 8.7493E-10 |
| ENST00000359889 | FAM3A     | 24.80 | 8.7972E-10 |
| ENST00000468427 | MPHOSPH10 | 24.80 | 8.7972E-10 |
| ENST00000508136 | SLC9B2    | 24.80 | 8.7972E-10 |
| ENST00000376228 | HLA-C     | 24.79 | 1.2909E-09 |
| ENST00000443875 | C1S       | 24.79 | 1.2909E-09 |
| ENST00000374922 | NBDY      | 24.79 | 8.8551E-10 |
| ENST00000565910 | ETFA      | 24.79 | 8.8551E-10 |
| ENST00000445033 | RBMS3     | 24.78 | 8.8838E-10 |
| ENST00000510019 | RPS23     | 24.78 | 8.8838E-10 |
| ENST00000581779 | AMZ2      | 24.78 | 8.8838E-10 |
| ENST00000507479 | ANKRD37   | 24.78 | 8.9149E-10 |
| ENST00000419040 | CASP8AP2  | 24.78 | 8.9149E-10 |
| ENST00000672165 | CASP8AP2  | 24.78 | 8.9149E-10 |
| ENST00000489992 | FLAD1     | 24.78 | 8.9149E-10 |
| ENST00000537126 | MLF2      | 24.78 | 8.9149E-10 |
| ENST00000630695 | UBE2A     | 24.78 | 8.9149E-10 |
| ENST00000613394 | None      | 24.77 | 8.9871E-10 |
| ENST00000535336 | MFAP5     | 24.76 | 9.0536E-10 |
| ENST00000620645 | None      | 24.76 | 9.0536E-10 |
| ENST00000465325 | RPL14     | 24.76 | 9.1218E-10 |

|                 |            |       |            |
|-----------------|------------|-------|------------|
| ENST00000521330 | ENDOV      | 24.76 | 9.1218E-10 |
| ENST00000498481 | ADAM15     | 24.75 | 9.1831E-10 |
| ENST00000619610 | U2AF1L5    | 24.75 | 9.1831E-10 |
| ENST00000650659 | RIT1       | 24.75 | 9.1831E-10 |
| ENST00000439082 | AKR1C3     | 24.74 | 9.2607E-10 |
| ENST00000395633 | ATP5F1D    | 24.74 | 1.1288E-09 |
| ENST00000414897 | TRIM22     | 24.74 | 1.1288E-09 |
| ENST00000517789 | POLR3D     | 24.74 | 1.3714E-09 |
| ENST00000496993 | ACBD6      | 24.74 | 9.3220E-10 |
| ENST00000517760 | C8orf76    | 24.74 | 9.3220E-10 |
| ENST00000538118 | BCAT1      | 24.74 | 9.3220E-10 |
| ENST00000639886 | HLA-Cw     | 24.73 | 9.3925E-10 |
| ENST00000338401 | METTL26    | 24.72 | 9.4589E-10 |
| ENST00000245923 | RTN2       | 24.72 | 9.4589E-10 |
| ENST00000641834 | C19orf48   | 24.72 | 9.5026E-10 |
| ENST00000453394 | RAD50      | 24.72 | 9.5026E-10 |
| ENST00000479376 | IDH3B      | 24.72 | 9.5026E-10 |
| ENST00000589669 | YJU2B      | 24.72 | 9.5026E-10 |
| ENST00000642928 | CD59       | 24.72 | 9.5026E-10 |
| ENST00000485106 | AOX1       | 24.68 | 1.4678E-09 |
| ENST00000579374 | RPL19      | 24.68 | 1.4678E-09 |
| ENST00000444946 | SOD2       | 24.64 | 1.0509E-09 |
| ENST00000452789 | TMEM134    | 24.64 | 1.0509E-09 |
| ENST00000509153 | DCAF4      | 24.63 | 1.0701E-09 |
| ENST00000347699 | MAP4K4     | 24.62 | 1.0775E-09 |
| ENST00000553418 | PNP        | 24.62 | 1.0775E-09 |
| ENST00000529984 | MUTYH      | 24.61 | 1.0848E-09 |
| ENST00000613627 | BSG        | 24.61 | 1.0848E-09 |
| ENST00000622871 | None       | 24.61 | 1.0848E-09 |
| ENST00000559880 | SLTM       | 24.61 | 1.6244E-09 |
| ENST00000672804 | HEL-S-133P | 24.60 | 1.0912E-09 |
| ENST00000543445 | LDHA       | 24.60 | 1.0912E-09 |
| ENST00000546677 | TMEM19     | 24.60 | 1.0912E-09 |
| ENST00000400175 | MYL12B     | 24.60 | 1.0988E-09 |
| ENST00000422436 | FAP        | 24.60 | 1.0988E-09 |
| ENST00000472258 | NKTR       | 24.60 | 1.0988E-09 |
| ENST00000338946 | PHF8       | 24.59 | 1.1088E-09 |
| ENST00000597212 | DMKN       | 24.59 | 1.1096E-09 |
| ENST00000438031 | TMED2      | 24.59 | 1.1096E-09 |
| ENST00000418261 | DMKN       | 24.58 | 1.6985E-09 |
| ENST00000559436 | ZHX3       | 24.58 | 1.1230E-09 |
| ENST00000614796 | HSF1       | 24.58 | 1.1230E-09 |
| ENST00000643099 | None       | 24.58 | 1.1230E-09 |
| ENST00000429258 | CDC123     | 24.57 | 1.1255E-09 |
| ENST00000480432 | RFC2       | 24.57 | 1.1255E-09 |

|                 |          |       |            |
|-----------------|----------|-------|------------|
| ENST00000588826 | RAD23A   | 24.57 | 1.1255E-09 |
| ENST00000391751 | RPS9     | 24.56 | 1.1292E-09 |
| ENST00000420206 | None     | 24.56 | 1.1292E-09 |
| ENST00000459956 | RPS19BP1 | 24.56 | 1.1292E-09 |
| ENST00000475590 | RBM5     | 24.56 | 1.1292E-09 |
| ENST00000551694 | FKBP11   | 24.56 | 1.1292E-09 |
| ENST00000569234 | TERF2IP  | 24.56 | 1.1292E-09 |
| ENST00000615167 | None     | 24.56 | 1.1292E-09 |
| ENST00000360786 | CXNM     | 24.55 | 1.1463E-09 |
| ENST00000530463 | ZNF143   | 24.55 | 1.1463E-09 |
| ENST00000546670 | DCTN2    | 24.55 | 1.1463E-09 |
| ENST00000360947 | ZNF219   | 24.55 | 1.1463E-09 |
| ENST00000546795 | TMEM19   | 24.54 | 1.1560E-09 |
| ENST00000551117 | METTL1   | 24.54 | 1.1560E-09 |
| ENST00000598840 | SAE1     | 24.54 | 1.1681E-09 |
| ENST00000360579 | VPS29    | 24.53 | 1.7969E-09 |
| ENST00000444620 | ARID4B   | 24.53 | 1.7969E-09 |
| ENST00000468534 | CCDC88A  | 24.53 | 1.7969E-09 |
| ENST00000620540 | None     | 24.53 | 1.7969E-09 |
| ENST00000584514 | CENPX    | 24.53 | 1.1799E-09 |
| ENST00000461018 | CNN3     | 24.52 | 1.1887E-09 |
| ENST00000476174 | AZI2     | 24.52 | 1.1887E-09 |
| ENST00000331285 | PCYT2    | 24.52 | 1.1887E-09 |
| ENST00000300850 | ZNF646   | 24.52 | 1.1887E-09 |
| ENST00000245552 | NT5C     | 24.52 | 1.8366E-09 |
| ENST00000524854 | RIC8A    | 24.51 | 1.2004E-09 |
| ENST00000465139 | ANP32A   | 24.51 | 1.2070E-09 |
| ENST00000583037 | HYI      | 24.51 | 1.2070E-09 |
| ENST00000370066 | NTNG1    | 24.51 | 1.2070E-09 |
| ENST00000400907 | RERE     | 24.51 | 1.2070E-09 |
| ENST00000520382 | ATOX1    | 24.51 | 1.2070E-09 |
| ENST00000611584 | None     | 24.51 | 1.2070E-09 |
| ENST00000474939 | PRKAB2   | 24.50 | 1.2176E-09 |
| ENST00000540564 | SOAT1    | 24.50 | 1.2176E-09 |
| ENST00000542255 | ACADVL   | 24.48 | 1.2408E-09 |
| ENST00000426395 | FCGRT    | 24.48 | 1.2504E-09 |
| ENST00000543175 | PTRH1    | 24.48 | 1.2504E-09 |
| ENST00000505307 | UBE2D3   | 24.47 | 1.2602E-09 |
| ENST00000515836 | SDAD1    | 24.47 | 1.2602E-09 |
| ENST00000544649 | CCDC91   | 24.47 | 1.2602E-09 |
| ENST00000508495 | HINT1    | 24.46 | 1.2686E-09 |
| ENST00000543891 | TMEM183A | 24.46 | 1.2686E-09 |
| ENST00000553204 | LMBR1L   | 24.46 | 1.2686E-09 |
| ENST00000555414 | APEX1    | 24.45 | 1.2760E-09 |
| ENST00000164227 | BCL3     | 24.45 | 1.2760E-09 |

|                 |          |       |            |
|-----------------|----------|-------|------------|
| ENST00000535296 | SLC3A2   | 24.45 | 1.2760E-09 |
| ENST00000652287 | UROD     | 24.45 | 1.2760E-09 |
| ENST00000565975 | SPIN1    | 24.45 | 1.2760E-09 |
| ENST00000426679 | ISCA1P1  | 24.44 | 1.2909E-09 |
| ENST00000355082 | EIF3I    | 24.44 | 1.2909E-09 |
| ENST00000408952 | None     | 24.44 | 1.2909E-09 |
| ENST00000460950 | PRDX6    | 24.44 | 1.2909E-09 |
| ENST00000468085 | DUSP10   | 24.44 | 1.2909E-09 |
| ENST00000498549 | DENND10  | 24.44 | 1.2909E-09 |
| ENST00000585518 | HAUS1    | 24.44 | 1.2909E-09 |
| ENST00000622665 | CWC25    | 24.44 | 1.2909E-09 |
| ENST00000632717 | None     | 24.44 | 1.2909E-09 |
| ENST00000302422 | TMEM256  | 24.44 | 1.2909E-09 |
| ENST00000639136 | TMEM256  | 24.44 | 1.2909E-09 |
| ENST00000396822 | SNAI2    | 24.44 | 1.2909E-09 |
| ENST00000409773 | DYNC1I2  | 24.44 | 1.2909E-09 |
| ENST00000489022 | AKR1B1   | 24.44 | 1.2909E-09 |
| ENST00000618773 | UCHL3    | 24.43 | 2.0103E-09 |
| ENST00000479362 | CDK11A   | 24.42 | 1.3094E-09 |
| ENST00000481274 | IMPDH2   | 24.42 | 1.3094E-09 |
| ENST00000507753 | ANKRD37  | 24.42 | 1.3094E-09 |
| ENST00000542638 | ELOVL5   | 24.42 | 1.3094E-09 |
| ENST00000607471 | MED16    | 24.42 | 1.3094E-09 |
| ENST00000641939 | PHGDH    | 24.42 | 1.3094E-09 |
| ENST00000371460 | SUPT3H   | 24.41 | 1.3342E-09 |
| ENST00000493454 | NAA50    | 24.40 | 1.3481E-09 |
| ENST00000636843 | CTSD     | 24.40 | 1.3481E-09 |
| ENST00000376027 | TEX30    | 24.39 | 1.3620E-09 |
| ENST00000483896 | RRP1     | 24.39 | 1.3620E-09 |
| ENST00000597202 | PNPLA6   | 24.39 | 1.3620E-09 |
| ENST00000541426 | ETV6     | 24.38 | 1.3766E-09 |
| ENST00000511393 | ANKRD37  | 24.38 | 1.3766E-09 |
| ENST00000508361 | TARS1    | 24.38 | 1.3766E-09 |
| ENST00000619603 | None     | 24.37 | 2.4170E-09 |
| ENST00000461311 | CAMTA1   | 24.36 | 1.4417E-09 |
| ENST00000507396 | SDAD1    | 24.36 | 1.4417E-09 |
| ENST00000530860 | DCPS     | 24.17 | 2.8599E-09 |
| ENST00000243213 | IL13RA2  | 24.16 | 2.9615E-09 |
| ENST00000296126 | WDR43    | 24.16 | 2.9615E-09 |
| ENST00000361682 | COMT     | 23.94 | 3.8728E-09 |
| ENST00000508573 | SMARCA5  | 23.94 | 3.8728E-09 |
| ENST00000514300 | QDPR     | 23.94 | 3.8728E-09 |
| ENST00000361891 | ILF2     | 23.61 | 6.4016E-09 |
| ENST00000338338 | AURKAIP1 | 23.41 | 8.2861E-09 |
| ENST00000457215 | ITM2C    | 23.25 | 1.0136E-08 |

|                 |          |       |            |
|-----------------|----------|-------|------------|
| ENST00000467351 | RASA4B   | 23.25 | 1.0136E-08 |
| ENST00000523589 | CLU      | 23.25 | 1.0136E-08 |
| ENST00000582773 | TMEM104  | 23.25 | 1.0136E-08 |
| ENST00000389463 | LAMA4    | 23.25 | 1.0193E-08 |
| ENST00000532375 | TSPAN4   | 23.25 | 1.0193E-08 |
| ENST00000412505 | ARL6IP4  | 23.24 | 1.0228E-08 |
| ENST00000446821 | ACTR3    | 23.24 | 1.0228E-08 |
| ENST00000591695 | TMED1    | 23.24 | 1.0228E-08 |
| ENST00000520648 | STC2     | 23.24 | 1.0228E-08 |
| ENST00000494549 | ACTR1A   | 23.24 | 1.0270E-08 |
| ENST00000565205 | TRAPPC2L | 23.24 | 1.0270E-08 |
| ENST00000598544 | NOSIP    | 23.24 | 1.0270E-08 |
| ENST00000356508 | PLD3     | 23.23 | 1.0312E-08 |
| ENST00000442970 | NKTR     | 23.23 | 1.0312E-08 |
| ENST00000527906 | PSMC3    | 23.23 | 1.0312E-08 |
| ENST00000359551 | SHARPIN  | 23.23 | 1.0363E-08 |
| ENST00000474052 | PHYKPL   | 23.23 | 1.0363E-08 |
| ENST00000235958 | HMGCL    | 23.22 | 1.0409E-08 |
| ENST00000411695 | ST13     | 23.22 | 1.0409E-08 |
| ENST00000413566 | EXOC5    | 23.22 | 1.0409E-08 |
| ENST00000583921 | RAB31    | 23.21 | 1.0458E-08 |
| ENST00000600697 | ZNF749   | 23.21 | 1.0458E-08 |
| ENST00000265260 | PCNP     | 23.21 | 1.0458E-08 |
| ENST00000423467 | TENT5A   | 23.21 | 1.0511E-08 |
| ENST00000445842 | NKTR     | 23.21 | 1.0511E-08 |
| ENST00000486653 | UBE2V1   | 23.21 | 1.0511E-08 |
| ENST00000463880 | ARF4     | 23.20 | 1.0552E-08 |
| ENST00000524427 | FEZ1     | 23.20 | 1.0552E-08 |
| ENST00000593149 | EIF3K    | 23.20 | 1.0552E-08 |
| ENST00000593287 | C19orf48 | 23.20 | 1.0552E-08 |
| ENST00000634474 | None     | 23.20 | 1.0552E-08 |
| ENST00000369754 | TENT5A   | 23.20 | 1.0609E-08 |
| ENST00000558340 | DHRS1    | 23.20 | 1.0609E-08 |
| ENST00000645396 | None     | 23.20 | 1.0609E-08 |
| ENST00000450518 | ACTL6A   | 22.96 | 1.4516E-08 |
| ENST00000621783 | CPNE3    | 22.96 | 1.4516E-08 |
| ENST00000644078 | CYSTM1   | 22.96 | 1.4516E-08 |
| ENST00000393155 | DCN      | 17.51 | 1.7434E-06 |
| ENST00000555619 | NPC2     | 16.06 | 9.5458E-06 |
| ENST00000276390 | ATP6V1B2 | 15.87 | 5.5114E-05 |
| ENST00000408941 | SCP2     | 15.82 | 1.0124E-04 |
| ENST00000340852 | HM13     | 15.63 | 6.2700E-05 |
| ENST00000397721 | CADPS2   | 15.47 | 2.1224E-04 |
| ENST00000389093 | PKM      | 15.25 | 4.9598E-05 |
| ENST00000338663 | SLC3A2   | 15.22 | 2.7182E-04 |

|                 |              |       |            |
|-----------------|--------------|-------|------------|
| ENST00000442997 | AKR1C1       | 15.18 | 2.8227E-04 |
| ENST00000644362 | HEL-S-68p    | 15.11 | 2.1039E-04 |
| ENST00000464781 | RBMX         | 15.03 | 4.9598E-05 |
| ENST00000303436 | ARF4         | 14.98 | 1.4132E-04 |
| ENST00000413971 | TOP2B        | 14.92 | 3.6638E-04 |
| ENST00000230340 | BYSL         | 14.82 | 4.0539E-04 |
| ENST00000656419 | GNAS         | 14.76 | 2.0489E-04 |
| ENST00000478000 | ADAP1        | 14.72 | 4.3271E-05 |
| ENST00000315423 | TNIP2        | 14.71 | 1.3439E-04 |
| ENST00000611080 | None         | 14.71 | 4.5006E-04 |
| ENST00000561457 | TMEM250      | 14.70 | 1.5689E-04 |
| ENST00000358406 | GSTK1        | 14.68 | 3.7186E-04 |
| ENST00000417189 | NRP2         | 14.62 | 3.9488E-04 |
| ENST00000327892 | TUBB         | 14.51 | 1.2015E-04 |
| ENST00000518857 | ATP6V1C1     | 14.50 | 1.7354E-04 |
| ENST00000495447 | MGST3        | 14.49 | 1.6761E-04 |
| ENST00000449428 | MXRA7        | 14.45 | 2.4952E-05 |
| ENST00000617716 | LOC102724159 | 14.45 | 8.1174E-04 |
| ENST00000645908 | RPL5         | 14.45 | 2.1868E-04 |
| ENST00000535090 | RAN          | 14.44 | 2.1224E-04 |
| ENST00000464916 | COL1A2       | 14.37 | 3.2665E-04 |
| ENST00000351018 | ARHG         | 14.36 | 6.3038E-04 |
| ENST00000291386 | SSU72        | 14.34 | 6.3799E-04 |
| ENST00000281938 | HSPB8        | 14.33 | 2.2327E-04 |
| ENST00000393128 | MRPL42       | 14.30 | 5.3736E-04 |
| ENST00000531329 | EIF3F        | 14.28 | 5.4467E-04 |
| ENST00000431664 | SAR1A        | 14.25 | 4.9752E-04 |
| ENST00000644020 | PMP22        | 14.24 | 5.6716E-04 |
| ENST00000551003 | PRR13        | 14.18 | 2.3599E-04 |
| ENST00000301012 | MVD          | 14.17 | 7.5023E-04 |
| ENST00000246802 | NOP53        | 14.17 | 1.9808E-04 |
| ENST00000388825 | GPX3         | 14.15 | 1.3029E-04 |
| ENST00000348124 | TRAF6        | 14.14 | 1.0789E-03 |
| ENST00000222005 | CDC37        | 14.13 | 1.0914E-03 |
| ENST00000405140 | CLU          | 14.10 | 9.9973E-04 |
| ENST00000265857 | GET4         | 14.08 | 8.2266E-04 |
| ENST00000550777 | METAP2       | 14.07 | 8.2487E-04 |
| ENST00000340607 | PTGES        | 14.07 | 1.3285E-04 |
| ENST00000355653 | VAT1         | 14.06 | 2.1647E-04 |
| ENST00000381187 | CD99         | 14.05 | 2.0321E-04 |
| ENST00000370435 | OGFRL1       | 14.02 | 7.0067E-04 |
| ENST00000217233 | TRIB3        | 13.96 | 3.0568E-05 |
| ENST00000519004 | PABPC1       | 13.96 | 4.2089E-04 |
| ENST00000285908 | BOD1         | 13.92 | 2.3169E-04 |
| ENST00000258405 | SERPINE2     | 13.89 | 2.7450E-04 |

|                 |          |       |            |
|-----------------|----------|-------|------------|
| ENST00000520687 | SPARC    | 13.88 | 1.3631E-03 |
| ENST00000378470 | FAM107B  | 13.88 | 1.2241E-03 |
| ENST00000240333 | SLC35B1  | 13.86 | 3.7186E-04 |
| ENST00000410113 | EVA1A    | 13.77 | 1.0906E-03 |
| ENST00000482600 | EIF3L    | 13.77 | 3.4473E-04 |
| ENST00000000233 | ARF5     | 13.77 | 1.0947E-03 |
| ENST00000317897 | MAGEF1   | 13.76 | 4.1039E-04 |
| ENST00000475650 | TBC1D10B | 13.76 | 1.5237E-03 |
| ENST00000400531 | TUBB     | 13.74 | 7.4761E-04 |
| ENST00000396059 | UBE2V1   | 13.73 | 4.0960E-04 |
| ENST00000525900 | FDFT1    | 13.68 | 3.6982E-04 |
| ENST00000229563 | TMEM14C  | 13.67 | 4.0947E-04 |
| ENST00000643226 | None     | 13.67 | 4.0947E-04 |
| ENST00000552962 | DCN      | 13.67 | 3.7030E-04 |
| ENST00000572383 | PFN1     | 13.66 | 5.3048E-04 |
| ENST00000360840 | MRPL37   | 13.65 | 9.2971E-05 |
| ENST00000292314 | CCDC12   | 13.65 | 1.6799E-03 |
| ENST00000619426 | PSMB3    | 13.63 | 4.3103E-04 |
| ENST00000343528 | PDXK     | 13.58 | 5.4185E-04 |
| ENST00000611014 | None     | 13.58 | 4.9465E-04 |
| ENST00000652253 | NKAP     | 13.56 | 4.7371E-04 |
| ENST00000584008 | PSMD12   | 13.56 | 1.8100E-03 |
| ENST00000301522 | PRDX2    | 13.55 | 3.0902E-04 |
| ENST00000470017 | PRDX6    | 13.54 | 5.2761E-04 |
| ENST00000611688 | None     | 13.51 | 5.0825E-04 |
| ENST00000295006 | CAPN2    | 13.50 | 2.1559E-03 |
| ENST00000334678 | RPS19BP1 | 13.41 | 9.6826E-04 |
| ENST00000622702 | None     | 13.40 | 5.2709E-04 |
| ENST00000395044 | VDAC1    | 13.39 | 1.5440E-03 |
| ENST00000635671 | EFEMP1   | 13.36 | 3.6220E-04 |
| ENST00000276096 | EBP      | 13.32 | 1.6515E-03 |
| ENST00000368687 | CHTOP    | 13.31 | 1.1284E-03 |
| ENST00000350021 | NDUFB6   | 13.30 | 1.0168E-03 |
| ENST00000481073 | XPO1     | 13.30 | 1.9514E-03 |
| ENST00000611428 | CD99     | 13.28 | 6.7110E-04 |
| ENST00000425762 | PSMB5    | 13.24 | 5.8790E-04 |
| ENST00000296289 | None     | 13.19 | 1.5324E-03 |
| ENST00000303904 | COPS6    | 13.18 | 2.5121E-03 |
| ENST00000601655 | RPS16    | 13.18 | 5.5977E-04 |
| ENST00000368884 | PSMD4    | 13.14 | 2.9402E-03 |
| ENST00000196061 | PLOD1    | 13.13 | 2.3537E-03 |
| ENST00000202834 | TMEM230  | 13.13 | 1.9591E-03 |
| ENST00000471273 | TBC1D23  | 13.11 | 3.0028E-03 |
| ENST00000543462 | VEGFB    | 13.11 | 6.9710E-04 |
| ENST00000267812 | MFAP1    | 13.07 | 2.4753E-03 |



|                 |          |       |            |
|-----------------|----------|-------|------------|
| ENST00000470074 | TANC1    | 13.07 | 2.5121E-03 |
| ENST00000264748 | FGFRL1   | 13.06 | 1.7143E-03 |
| ENST00000537814 | SLC35B2  | 13.06 | 2.0828E-03 |
| ENST00000390687 | SNRPN    | 13.06 | 2.5354E-03 |
| ENST00000267996 | TPM1     | 13.04 | 1.1600E-03 |
| ENST00000288986 | NCK1     | 13.04 | 2.8427E-03 |
| ENST00000418939 | PPP1R2   | 13.03 | 2.8534E-03 |
| ENST00000361439 | NSMCE1   | 13.03 | 1.3170E-03 |
| ENST00000380539 | SERPINB6 | 13.02 | 6.6199E-04 |
| ENST00000535217 | CCDC86   | 13.02 | 2.8851E-03 |
| ENST00000272167 | EPHX1    | 13.00 | 1.4161E-03 |
| ENST00000367885 | MGST3    | 13.00 | 9.0606E-04 |
| ENST00000288439 | SLC38A10 | 13.00 | 2.1939E-03 |
| ENST00000601220 | CHMP2A   | 12.98 | 6.3153E-04 |
| ENST00000614502 | PDLIM2   | 12.96 | 8.5227E-04 |
| ENST00000486823 | GSTM3    | 12.94 | 8.1059E-04 |
| ENST00000542928 | COPS2    | 12.92 | 2.3574E-03 |
| ENST00000362091 | FBH1     | 12.88 | 1.3483E-03 |
| ENST00000549164 | ATP5MC2  | 12.87 | 1.0209E-03 |
| ENST00000257013 | RTL8C    | 12.86 | 1.3439E-04 |
| ENST00000206020 | SPAG7    | 12.86 | 1.0396E-03 |
| ENST00000444683 | HLA-E    | 12.85 | 1.4345E-03 |
| ENST00000425603 | HLA-E    | 12.85 | 1.4345E-03 |
| ENST00000498411 | FLNA     | 12.84 | 1.7347E-03 |
| ENST00000256689 | SLC38A2  | 12.83 | 2.3683E-04 |
| ENST00000368010 | PFDN2    | 12.83 | 7.6185E-04 |
| ENST00000269080 | ABCA8    | 12.82 | 3.0557E-03 |
| ENST00000440930 | None     | 12.82 | 1.4297E-03 |
| ENST00000361901 | CALD1    | 12.79 | 1.4182E-03 |
| ENST00000637215 | CELF2    | 12.78 | 3.5258E-03 |
| ENST00000381192 | CD99     | 12.76 | 2.1039E-04 |
| ENST00000490426 | ITGB1BP1 | 12.76 | 1.0410E-03 |
| ENST00000426447 | PDAP1    | 12.76 | 1.0041E-03 |
| ENST00000379852 | NRBP1    | 12.75 | 4.0368E-03 |
| ENST00000554455 | HNRNPC   | 12.74 | 3.6151E-03 |
| ENST00000403564 | RPS7     | 12.74 | 1.2131E-03 |
| ENST00000392826 | SLC4A2   | 12.74 | 1.0299E-03 |
| ENST00000436648 | GLYR1    | 12.73 | 3.3073E-03 |
| ENST00000370010 | SENP6    | 12.69 | 3.4462E-03 |
| ENST00000536503 | MED21    | 12.68 | 1.1615E-03 |
| ENST00000648919 | ERLIN2   | 12.67 | 3.8305E-03 |
| ENST00000460450 | TTL      | 12.67 | 3.8462E-03 |
| ENST00000297109 | SAP30L   | 12.65 | 3.3374E-03 |
| ENST00000272902 | SUMF1    | 12.64 | 3.5514E-03 |
| ENST00000328434 | COA3     | 12.63 | 3.9544E-03 |

|                 |          |       |            |
|-----------------|----------|-------|------------|
| ENST00000393470 | CAV1     | 12.63 | 3.0100E-03 |
| ENST00000371614 | KTI12    | 12.63 | 3.5829E-03 |
| ENST00000282032 | ARL14EP  | 12.63 | 1.6772E-03 |
| ENST00000263774 | NDUFS3   | 12.60 | 3.0836E-03 |
| ENST00000645714 | None     | 12.60 | 3.0836E-03 |
| ENST00000330579 | NOC4L    | 12.60 | 4.0532E-03 |
| ENST00000672504 | NOC4L    | 12.60 | 4.0532E-03 |
| ENST00000425642 | ATP6V0E2 | 12.60 | 4.0701E-03 |
| ENST00000460720 | ITGB1BP1 | 12.59 | 9.5678E-04 |
| ENST00000645300 | RPL5     | 12.59 | 4.5529E-03 |
| ENST00000370247 | BCAR3    | 12.59 | 3.7115E-03 |
| ENST00000275036 | HMG3     | 12.59 | 3.1263E-03 |
| ENST00000553995 | CALM1    | 12.56 | 1.2201E-03 |
| ENST00000255764 | MED10    | 12.54 | 3.8919E-03 |
| ENST00000509282 | GLRB     | 12.54 | 4.2671E-03 |
| ENST00000511832 | PHB      | 12.52 | 2.7732E-03 |
| ENST00000451378 | NDUFAF3  | 12.52 | 1.5145E-03 |
| ENST00000329970 | GTF3C6   | 12.50 | 4.8622E-03 |
| ENST00000503501 | SENP6    | 12.49 | 3.4054E-03 |
| ENST00000479853 | SDHAF3   | 12.48 | 4.4449E-03 |
| ENST00000414083 | DAXX     | 12.48 | 4.4455E-03 |
| ENST00000531743 | FAU      | 12.48 | 1.5776E-03 |
| ENST00000369937 | CUEDC2   | 12.47 | 4.1041E-03 |
| ENST00000264335 | HEL2     | 12.47 | 2.0398E-03 |
| ENST00000379715 | EEF1E1   | 12.42 | 4.2993E-03 |
| ENST00000620073 | HSP90AB1 | 12.41 | 1.2893E-03 |
| ENST00000546323 | MED21    | 12.39 | 1.7328E-03 |
| ENST00000375499 | SDHB     | 12.39 | 4.3437E-03 |
| ENST00000590161 | PALM     | 12.39 | 5.3513E-03 |
| ENST00000465242 | POLE4    | 12.38 | 1.2292E-03 |
| ENST00000555085 | TMED10   | 12.37 | 3.1482E-03 |
| ENST00000561006 | PPP2R5C  | 12.37 | 2.8585E-03 |
| ENST00000487010 | COL3A1   | 12.37 | 4.2773E-03 |
| ENST00000376499 | TLE1     | 12.37 | 4.4154E-03 |
| ENST00000491229 | PSMD1    | 12.36 | 4.8746E-03 |
| ENST00000504492 | MAP1B    | 12.36 | 4.8746E-03 |
| ENST00000319285 | DCTPP1   | 12.35 | 4.5375E-03 |
| ENST00000470701 | POLR2F   | 12.34 | 1.7414E-03 |
| ENST00000613102 | GGNBP2   | 12.34 | 4.5539E-03 |
| ENST00000450592 | NUSAP1   | 12.33 | 3.8811E-03 |
| ENST00000399272 | RCAN1    | 12.33 | 4.4734E-03 |
| ENST00000614574 | C8orf58  | 12.29 | 5.7720E-03 |
| ENST00000366466 | NDUFB6   | 12.29 | 2.7047E-03 |
| ENST00000376582 | TIMM17B  | 12.29 | 1.3149E-03 |
| ENST00000260952 | ASNSD1   | 12.29 | 4.7208E-03 |

|                 |           |       |            |
|-----------------|-----------|-------|------------|
| ENST00000527449 | RBM25     | 12.29 | 4.7634E-03 |
| ENST00000447927 | EIF6      | 12.27 | 4.7928E-03 |
| ENST00000624234 | EIF3L     | 12.27 | 2.1935E-03 |
| ENST00000199320 | DIMT1     | 12.27 | 4.7820E-03 |
| ENST00000550515 | ESYT1     | 12.27 | 5.2731E-03 |
| ENST00000004982 | HSPB6     | 12.26 | 1.5786E-03 |
| ENST00000497078 | RPS18     | 12.26 | 3.4762E-03 |
| ENST00000413140 | ACP1      | 12.26 | 2.1361E-03 |
| ENST00000300086 | TERF2IP   | 12.25 | 2.7557E-04 |
| ENST00000356064 | ARFIP1    | 12.22 | 4.2290E-03 |
| ENST00000572517 | SERPINF1  | 12.21 | 5.0334E-03 |
| ENST00000401959 | SNU13     | 12.21 | 6.0886E-03 |
| ENST00000295491 | MRPS18C   | 12.20 | 2.2104E-03 |
| ENST00000269195 | GALNT1    | 12.19 | 4.8283E-03 |
| ENST00000350028 | SAMM50    | 12.19 | 5.1297E-03 |
| ENST00000250454 | EAPP      | 12.19 | 6.2504E-03 |
| ENST00000476292 | SMYD4     | 12.18 | 5.6647E-03 |
| ENST00000409764 | CYCS      | 12.18 | 4.3795E-03 |
| ENST00000360472 | PEA15     | 12.17 | 4.3476E-04 |
| ENST00000372520 | None      | 12.16 | 1.6899E-03 |
| ENST00000304636 | COL3A1    | 12.16 | 5.0792E-04 |
| ENST00000412716 | DAZAP2    | 12.16 | 6.3890E-03 |
| ENST00000551727 | NFYB      | 12.16 | 1.9259E-03 |
| ENST00000409658 | WDR33     | 12.16 | 5.2737E-03 |
| ENST00000637771 | FGL2      | 12.16 | 5.7619E-03 |
| ENST00000522521 | MRPL15    | 12.16 | 4.4455E-03 |
| ENST00000358402 | MAX       | 12.16 | 3.0369E-03 |
| ENST00000328879 | KLHL22    | 12.15 | 4.9747E-03 |
| ENST00000586742 | TLE5      | 12.14 | 2.0386E-03 |
| ENST00000378764 | OPTN      | 12.14 | 5.2954E-03 |
| ENST00000361298 | BEX3      | 12.12 | 1.0372E-03 |
| ENST00000462608 | FAP       | 12.12 | 5.9515E-03 |
| ENST00000577429 | THOC1     | 12.10 | 3.9848E-03 |
| ENST00000392367 | RAN       | 12.09 | 2.2660E-03 |
| ENST00000540225 | None      | 12.08 | 1.9208E-03 |
| ENST00000484872 | IMPDH2    | 12.08 | 2.0398E-03 |
| ENST00000587393 | TLE5      | 12.07 | 2.8299E-03 |
| ENST00000228318 | SLC25A3   | 12.07 | 4.7678E-03 |
| ENST00000534794 | RSF1      | 12.07 | 1.9514E-03 |
| ENST00000613953 | TPI1      | 12.05 | 5.4121E-03 |
| ENST00000380753 | AKR1C2    | 12.05 | 5.4132E-03 |
| ENST00000248378 | EMC6      | 12.05 | 5.7750E-03 |
| ENST00000336812 | DHX15     | 12.04 | 5.8268E-03 |
| ENST00000532986 | EEF1G     | 12.03 | 3.2462E-03 |
| ENST00000380927 | SECISBP2L | 12.02 | 5.8831E-03 |

|                 |             |       |            |
|-----------------|-------------|-------|------------|
| ENST00000381854 | CDC37L1     | 12.02 | 2.1788E-03 |
| ENST00000020945 | SNAI2       | 12.00 | 7.7856E-04 |
| ENST00000624481 | CD99        | 11.98 | 7.3629E-03 |
| ENST00000497557 | EMC3        | 11.97 | 6.6641E-03 |
| ENST00000265523 | BLVRA       | 11.96 | 7.4835E-03 |
| ENST00000485641 | UXT         | 11.95 | 3.8403E-03 |
| ENST00000541679 | RAN         | 11.95 | 7.4761E-04 |
| ENST00000435120 | MLF2        | 11.94 | 6.0620E-03 |
| ENST00000225525 | TAX1BP3     | 11.92 | 1.8741E-03 |
| ENST00000512903 | DHX15       | 11.90 | 5.8460E-04 |
| ENST00000431232 | PGAP6       | 11.90 | 6.4306E-03 |
| ENST00000473593 | PDCD6IP     | 11.89 | 4.6988E-03 |
| ENST00000503756 | None        | 11.89 | 7.1563E-03 |
| ENST00000397375 | MRPS34      | 11.88 | 6.6226E-03 |
| ENST00000539573 | NDUFA9      | 11.87 | 5.6344E-03 |
| ENST00000514911 | DIMT1       | 11.87 | 7.2607E-03 |
| ENST00000354895 | VKORC1      | 11.87 | 2.6498E-03 |
| ENST00000439363 | EIF2B3      | 11.86 | 4.3795E-03 |
| ENST00000346213 | RAB5C       | 11.86 | 1.5730E-03 |
| ENST00000368300 | LMNA        | 11.86 | 1.0452E-03 |
| ENST00000532402 | HEL-S-164nA | 11.85 | 2.8252E-03 |
| ENST00000300434 | FAM102A     | 11.84 | 5.7767E-03 |
| ENST00000407721 | DHCR7       | 11.84 | 6.5695E-03 |
| ENST00000522934 | COX6C       | 11.82 | 2.7337E-03 |
| ENST00000360403 | EIF2B3      | 11.81 | 1.3487E-03 |
| ENST00000373238 | SAR1A       | 11.81 | 8.0748E-03 |
| ENST00000267102 | LMBR1L      | 11.80 | 7.6406E-03 |
| ENST00000467246 | HPS1        | 11.79 | 1.4918E-03 |
| ENST00000510906 | PDPN        | 11.78 | 7.7489E-03 |
| ENST00000418115 | RHOA        | 11.78 | 2.7995E-04 |
| ENST00000343575 | CXCL12      | 11.77 | 6.7762E-03 |
| ENST00000403685 | ETV1        | 11.77 | 7.8110E-03 |
| ENST00000372836 | CNPY3       | 11.77 | 5.5978E-04 |
| ENST00000354361 | SYF2        | 11.77 | 7.2350E-03 |
| ENST00000394564 | AKAP9       | 11.76 | 7.8356E-03 |
| ENST00000441864 | BCL2L12     | 11.76 | 7.8480E-03 |
| ENST00000381858 | CDC37L1     | 11.73 | 7.3629E-03 |
| ENST00000288398 | HEL-S-265   | 11.72 | 2.5275E-03 |
| ENST00000533542 | ZNF143      | 11.71 | 8.1342E-03 |
| ENST00000322157 | NPEPPS      | 11.71 | 8.1342E-03 |
| ENST00000373491 | TBC1D22B    | 11.70 | 3.0728E-03 |
| ENST00000346166 | RNF6        | 11.69 | 7.2750E-03 |
| ENST00000471706 | POLR3GL     | 11.69 | 6.4646E-03 |
| ENST00000397370 | RBM39       | 11.67 | 2.7178E-03 |
| ENST00000449164 | KRT223P     | 11.67 | 8.3855E-03 |

|                 |           |       |            |
|-----------------|-----------|-------|------------|
| ENST00000555473 | AHSA1     | 11.66 | 6.6696E-03 |
| ENST00000503715 | DEK       | 11.65 | 8.5075E-03 |
| ENST00000622633 | LITAF     | 11.64 | 7.5519E-03 |
| ENST00000542701 | RNF10     | 11.64 | 7.9439E-03 |
| ENST00000372829 | ARMCX1    | 11.62 | 7.9806E-03 |
| ENST00000508368 | DHX15     | 11.62 | 3.2616E-03 |
| ENST00000373821 | SRPK1     | 11.61 | 8.7717E-03 |
| ENST00000611779 | TAX1BP3   | 11.61 | 8.1214E-03 |
| ENST00000409724 | CAPG      | 11.60 | 8.0416E-03 |
| ENST00000394613 | PLAAT3    | 11.59 | 8.8796E-03 |
| ENST00000360718 | SQSTM1    | 11.59 | 8.8903E-03 |
| ENST00000481383 | FXR1      | 11.58 | 8.9723E-03 |
| ENST00000272065 | ACP1      | 11.58 | 3.4930E-03 |
| ENST00000544576 | MROH1     | 11.57 | 3.0532E-03 |
| ENST00000478013 | NRP2      | 11.56 | 9.0894E-03 |
| ENST00000223369 | YKT6      | 11.56 | 8.1119E-03 |
| ENST00000307296 | PDCD6IP   | 11.56 | 8.0145E-03 |
| ENST00000262061 | COPZ1     | 11.55 | 8.0134E-03 |
| ENST00000314787 | PINX1     | 11.54 | 8.5532E-03 |
| ENST00000425375 | TOM1      | 11.54 | 9.2578E-03 |
| ENST00000552235 | ZCRB1     | 11.53 | 9.0830E-04 |
| ENST00000524628 | BANF1     | 11.53 | 5.4163E-03 |
| ENST00000266085 | TIMP3     | 11.53 | 3.4387E-03 |
| ENST00000279839 | CWC15     | 11.53 | 8.1801E-03 |
| ENST00000224784 | ACTA2     | 11.52 | 8.2194E-03 |
| ENST00000527696 | RIC8A     | 11.52 | 3.9911E-03 |
| ENST00000426877 | TRAPPC5   | 11.51 | 3.4698E-03 |
| ENST00000556218 | PPP2R5C   | 11.49 | 8.8641E-03 |
| ENST00000491291 | PGK1      | 11.49 | 7.6720E-03 |
| ENST00000409157 | KCTD18    | 11.48 | 8.8641E-03 |
| ENST00000328649 | CIB1      | 11.48 | 8.4691E-03 |
| ENST00000491011 | DHX36     | 11.47 | 9.7229E-03 |
| ENST00000531186 | EIF3M     | 11.47 | 9.7683E-03 |
| ENST00000293831 | EIF4A1    | 11.46 | 3.9775E-03 |
| ENST00000554011 | EXOC5     | 11.45 | 9.0963E-03 |
| ENST00000261220 | METAP2    | 11.43 | 9.2578E-03 |
| ENST00000477583 | CACUL1    | 11.42 | 8.0463E-03 |
| ENST00000314797 | COPG1     | 11.42 | 1.3728E-03 |
| ENST00000274063 | SFRP2     | 11.42 | 1.7347E-03 |
| ENST00000297350 | TNFRSF11B | 11.41 | 3.6578E-03 |
| ENST00000377818 | MZT1      | 11.38 | 4.0701E-03 |
| ENST00000485527 | POLE4     | 11.38 | 3.8403E-03 |
| ENST00000413219 | SDCBP     | 11.38 | 9.0894E-03 |
| ENST00000482739 | RNF187    | 11.38 | 7.1930E-03 |
| ENST00000645627 | RNF187    | 11.38 | 7.1930E-03 |

|                 |          |       |            |
|-----------------|----------|-------|------------|
| ENST00000304434 | ELOVL5   | 11.37 | 2.6255E-03 |
| ENST00000552141 | LMBR1L   | 11.36 | 1.0555E-02 |
| ENST00000615544 | ACTG1    | 11.36 | 2.2398E-03 |
| ENST00000661807 | None     | 11.36 | 5.9656E-03 |
| ENST00000475042 | ABTB1    | 11.36 | 1.0603E-02 |
| ENST00000328724 | PPP2R5C  | 11.35 | 9.3766E-03 |
| ENST00000513367 | SRPK1    | 11.34 | 1.0742E-02 |
| ENST00000416660 | SLC51A   | 11.34 | 1.0798E-02 |
| ENST00000663894 | TPM4     | 11.33 | 8.8665E-04 |
| ENST00000533861 | TMEM179B | 11.32 | 9.9940E-03 |
| ENST00000548534 | WASHC4   | 11.31 | 1.1024E-02 |
| ENST00000336916 | FN1      | 11.30 | 4.0515E-03 |
| ENST00000526339 | NDUFS8   | 11.30 | 4.7678E-03 |
| ENST00000465762 | NDFIP2   | 11.30 | 1.1107E-02 |
| ENST00000452413 | KCTD3    | 11.29 | 1.1156E-02 |
| ENST00000619128 | PSMD1    | 11.29 | 1.6402E-03 |
| ENST00000476605 | MICU1    | 11.28 | 1.1269E-02 |
| ENST00000469467 | SLC4A2   | 11.28 | 1.1269E-02 |
| ENST00000339249 | ZNF449   | 11.27 | 9.9672E-03 |
| ENST00000375807 | SECISBP2 | 11.27 | 9.9770E-03 |
| ENST00000398733 | UBE2D2   | 11.26 | 2.8156E-03 |
| ENST00000335754 | ACTR8    | 11.25 | 1.0347E-02 |
| ENST00000602911 | PSMD8    | 11.25 | 3.0369E-03 |
| ENST00000358187 | ITPRIP   | 11.24 | 4.0752E-03 |
| ENST00000371482 | NSMF     | 11.24 | 1.0367E-02 |
| ENST00000406620 | UBE2I    | 11.23 | 1.1631E-02 |
| ENST00000580453 | FLII     | 11.23 | 1.1631E-02 |
| ENST00000640847 | None     | 11.23 | 1.1631E-02 |
| ENST00000572579 | CHD3     | 11.23 | 9.3069E-03 |
| ENST00000557006 | TMEM229B | 11.23 | 4.4725E-03 |
| ENST00000299335 | COX11    | 11.22 | 1.0414E-02 |
| ENST00000421682 | RBM6     | 11.21 | 1.1802E-02 |
| ENST00000528699 | SIPA1    | 11.21 | 1.1802E-02 |
| ENST00000372270 | PLAC9    | 11.21 | 1.1802E-02 |
| ENST00000533596 | KAT5     | 11.21 | 5.8085E-03 |
| ENST00000568415 | METRN    | 11.20 | 4.9342E-03 |
| ENST00000376957 | SRM      | 11.20 | 1.3043E-02 |
| ENST00000621032 | None     | 11.20 | 6.4306E-03 |
| ENST00000647178 | FDFT1    | 11.20 | 2.4072E-03 |
| ENST00000647069 | None     | 11.20 | 2.4072E-03 |
| ENST00000493494 | TRIM22   | 11.20 | 1.1948E-02 |
| ENST00000405557 | POLR2F   | 11.20 | 6.1917E-03 |
| ENST00000400721 | ARHGDI4  | 11.19 | 9.6496E-03 |
| ENST00000536073 | ARL6IP4  | 11.19 | 1.1990E-02 |
| ENST00000573320 | HGS      | 11.19 | 1.1990E-02 |

|                 |          |       |            |
|-----------------|----------|-------|------------|
| ENST00000586370 | AP3D1    | 11.18 | 4.5044E-03 |
| ENST00000591909 | TUBB6    | 11.18 | 1.1226E-02 |
| ENST00000630865 | NCS1     | 11.18 | 1.0871E-02 |
| ENST00000344773 | BABAM2   | 11.17 | 1.0694E-02 |
| ENST00000530026 | EIF3M    | 11.17 | 9.7937E-03 |
| ENST00000594581 | STRN4    | 11.16 | 1.1292E-02 |
| ENST00000262487 | ISM1     | 11.16 | 1.1333E-02 |
| ENST00000371761 | CDKN2C   | 11.16 | 1.1043E-02 |
| ENST00000397863 | MBP      | 11.15 | 1.0968E-02 |
| ENST00000434715 | DCTN2    | 11.15 | 2.4017E-03 |
| ENST00000504285 | BDH2     | 11.15 | 1.2345E-02 |
| ENST00000449080 | CAPZA2   | 11.14 | 5.1046E-03 |
| ENST00000508482 | LUC7L3   | 11.12 | 7.2937E-03 |
| ENST00000552403 | TNS2     | 11.12 | 1.2587E-02 |
| ENST00000223361 | POLD2    | 11.11 | 1.1799E-02 |
| ENST00000221554 | YJU2B    | 11.11 | 1.1830E-02 |
| ENST00000644855 | SLC33A1  | 11.10 | 1.2789E-02 |
| ENST00000489964 | DARS1    | 11.10 | 1.1821E-02 |
| ENST00000574151 | HCFC1R1  | 11.10 | 8.2023E-03 |
| ENST00000380647 | CNTLN    | 11.10 | 1.1410E-02 |
| ENST00000588705 | None     | 11.09 | 5.6569E-03 |
| ENST00000573216 | BSG      | 11.07 | 1.0584E-02 |
| ENST00000610495 | F8A1     | 11.07 | 1.2067E-02 |
| ENST00000453542 | GPAT2    | 11.06 | 1.3132E-02 |
| ENST00000390658 | EID2     | 11.06 | 4.5949E-03 |
| ENST00000343677 | H1-2     | 11.06 | 1.0551E-02 |
| ENST00000430715 | RTN2     | 11.06 | 1.1760E-02 |
| ENST00000548249 | DCTN2    | 11.05 | 3.2402E-03 |
| ENST00000374846 | DYNLRB1  | 11.04 | 8.1214E-03 |
| ENST00000494677 | VEPH1    | 11.03 | 8.1801E-03 |
| ENST00000376113 | BIN1     | 11.01 | 4.8070E-03 |
| ENST00000368467 | PMVK     | 11.01 | 1.2048E-02 |
| ENST00000330154 | ARMCX2   | 11.00 | 2.1515E-03 |
| ENST00000261250 | C12orf4  | 11.00 | 1.2351E-02 |
| ENST00000446643 | WDR43    | 10.98 | 1.3999E-02 |
| ENST00000311086 | BOD1     | 10.98 | 2.3902E-03 |
| ENST00000573547 | DERL2    | 10.98 | 1.2992E-02 |
| ENST00000622125 | MSRB1    | 10.97 | 1.4085E-02 |
| ENST00000299259 | COPS2    | 10.97 | 7.4036E-03 |
| ENST00000474210 | MIEN1    | 10.94 | 1.2902E-02 |
| ENST00000426396 | SLC25A17 | 10.94 | 1.4403E-02 |
| ENST00000307098 | SPRR1B   | 10.94 | 1.3410E-02 |
| ENST00000496435 | AKR1B10  | 10.94 | 6.1212E-03 |
| ENST00000404574 | SMTN     | 10.93 | 1.4494E-02 |
| ENST00000242729 | SSPN     | 10.92 | 1.4542E-02 |

|                 |           |       |            |
|-----------------|-----------|-------|------------|
| ENST00000498159 | SLC66A1L  | 10.91 | 1.4628E-02 |
| ENST00000392547 | WIPF1     | 10.90 | 1.3013E-02 |
| ENST00000420104 | ARPC2     | 10.90 | 7.7220E-03 |
| ENST00000373606 | MANBAL    | 10.89 | 1.3141E-02 |
| ENST00000469404 | NCK1      | 10.88 | 1.3441E-02 |
| ENST00000258739 | KDEL2     | 10.88 | 1.3861E-02 |
| ENST00000537888 | PEX11B    | 10.88 | 1.4924E-02 |
| ENST00000366899 | DUSP10    | 10.88 | 5.3650E-03 |
| ENST00000539242 | BCAR3     | 10.87 | 7.9096E-03 |
| ENST00000585675 | C19orf25  | 10.87 | 1.5012E-02 |
| ENST00000533482 | RAD50     | 10.86 | 1.5950E-02 |
| ENST00000311832 | COMMD1    | 10.86 | 1.4158E-02 |
| ENST00000380516 | SLTM      | 10.86 | 7.1215E-03 |
| ENST00000623876 | DDIT3     | 10.86 | 7.1991E-03 |
| ENST00000361390 | MT-ND1    | 10.86 | 2.6167E-03 |
| ENST00000476531 | PGK1      | 10.85 | 1.5207E-02 |
| ENST00000583848 | ACADVL    | 10.85 | 6.6384E-03 |
| ENST00000507756 | RACK1     | 10.85 | 6.4033E-03 |
| ENST00000521770 | CLU       | 10.85 | 1.3576E-02 |
| ENST00000381342 | SNRPB     | 10.84 | 1.3843E-03 |
| ENST00000427908 | MXD3      | 10.84 | 8.7874E-03 |
| ENST00000619387 | AATF      | 10.84 | 7.1708E-03 |
| ENST00000527525 | SIPA1     | 10.84 | 1.6732E-02 |
| ENST00000372764 | PLAU      | 10.83 | 1.3755E-02 |
| ENST00000415247 | HLA-DPA1  | 10.83 | 2.8286E-02 |
| ENST00000380554 | AKR1C3    | 10.83 | 1.4859E-02 |
| ENST00000464074 | RSU1      | 10.83 | 1.5452E-02 |
| ENST00000480865 | ACAA1     | 10.82 | 1.5506E-02 |
| ENST00000394936 | PSAP      | 10.82 | 1.9358E-02 |
| ENST00000418988 | PSMA1     | 10.82 | 1.4532E-02 |
| ENST00000590237 | KEAP1     | 10.82 | 1.5606E-02 |
| ENST00000331113 | KCND2     | 10.81 | 1.4424E-02 |
| ENST00000451562 | HEL-S-69p | 10.81 | 1.6555E-02 |
| ENST00000493172 | CAP2      | 10.81 | 1.4628E-02 |
| ENST00000265361 | SEMA3C    | 10.80 | 4.4036E-03 |
| ENST00000492095 | NECAP2    | 10.80 | 2.8770E-02 |
| ENST00000396060 | GTF2A2    | 10.80 | 4.7536E-03 |
| ENST00000598201 | SHKBP1    | 10.79 | 1.4750E-02 |
| ENST00000483493 | CAAP1     | 10.78 | 1.4905E-02 |
| ENST00000432899 | CALM2     | 10.78 | 2.8953E-02 |
| ENST00000374888 | ZXDB      | 10.78 | 1.4501E-02 |
| ENST00000544428 | ALG1      | 10.77 | 1.6086E-02 |
| ENST00000373192 | UNC5B     | 10.77 | 6.3376E-03 |
| ENST00000173785 | KLF6      | 10.76 | 1.4512E-02 |
| ENST00000316788 | AP3S1     | 10.76 | 5.6961E-03 |



|                 |           |       |            |
|-----------------|-----------|-------|------------|
| ENST00000401042 | MIER1     | 10.76 | 2.9215E-02 |
| ENST00000621973 | DDX1      | 10.76 | 1.4502E-02 |
| ENST00000494980 | CHMP2B    | 10.75 | 1.4750E-02 |
| ENST00000565267 | GSPT1     | 10.75 | 8.8384E-03 |
| ENST00000356327 | PLD1      | 10.73 | 1.5016E-02 |
| ENST00000361557 | PJA2      | 10.73 | 1.9111E-03 |
| ENST00000434851 | EIF3FP3   | 10.73 | 1.6616E-02 |
| ENST00000347869 | RBM5      | 10.72 | 1.8663E-02 |
| ENST00000376925 | CST3      | 10.72 | 1.4170E-03 |
| ENST00000647561 | NDUFV1    | 10.72 | 1.6732E-02 |
| ENST00000395565 | MDK       | 10.72 | 2.8036E-02 |
| ENST00000472863 | HOXB3     | 10.72 | 2.8036E-02 |
| ENST00000553490 | NPC2      | 10.72 | 2.8036E-02 |
| ENST00000588458 | ABCA8     | 10.72 | 2.8036E-02 |
| ENST00000528029 | TMEM262   | 10.72 | 2.8036E-02 |
| ENST00000498614 | COL6A1    | 10.72 | 3.8816E-03 |
| ENST00000488824 | GSTM3     | 10.71 | 7.6718E-03 |
| ENST00000632612 | CARS      | 10.71 | 1.8657E-02 |
| ENST00000437136 | PABPC4    | 10.71 | 1.5556E-02 |
| ENST00000339083 | RHOC      | 10.71 | 1.5287E-02 |
| ENST00000259486 | ENPP2     | 10.71 | 2.8147E-02 |
| ENST00000498818 | AKR1B10   | 10.71 | 2.8147E-02 |
| ENST00000557022 | ZFP36L1   | 10.71 | 2.8147E-02 |
| ENST00000378364 | APRT      | 10.71 | 7.0777E-03 |
| ENST00000593945 | TEAD2     | 10.71 | 2.9915E-02 |
| ENST00000592984 | HSPB6     | 10.70 | 1.5225E-02 |
| ENST00000345057 | TRADD     | 10.70 | 1.5759E-02 |
| ENST00000336695 | ROMO1     | 10.70 | 2.8286E-02 |
| ENST00000607829 | ASDURF    | 10.70 | 2.8286E-02 |
| ENST00000420625 | None      | 10.69 | 5.9782E-03 |
| ENST00000472729 | COMMD1    | 10.69 | 2.8401E-02 |
| ENST00000261847 | SECISBP2L | 10.69 | 2.8401E-02 |
| ENST00000348022 | RBBP6     | 10.69 | 2.8401E-02 |
| ENST00000438114 | None      | 10.69 | 2.8401E-02 |
| ENST00000566820 | DEF8      | 10.69 | 2.8401E-02 |
| ENST00000355209 | POLR3H    | 10.69 | 2.8401E-02 |
| ENST00000337566 | POLR3H    | 10.69 | 9.1461E-03 |
| ENST00000608606 | None      | 10.68 | 1.7174E-02 |
| ENST00000355674 | RSL1D1    | 10.68 | 2.8492E-02 |
| ENST00000438389 | ISOC2     | 10.68 | 2.8492E-02 |
| ENST00000544805 | RNF10     | 10.68 | 2.8492E-02 |
| ENST00000545322 | RBIS      | 10.68 | 2.8492E-02 |
| ENST00000546283 | NDUFS7    | 10.68 | 2.8492E-02 |
| ENST00000511473 | RACK1     | 10.68 | 2.8492E-02 |
| ENST00000313468 | NDUFS8    | 10.68 | 1.9991E-03 |

|                 |          |       |            |
|-----------------|----------|-------|------------|
| ENST00000419359 | KIZ      | 10.67 | 2.8650E-02 |
| ENST00000568233 | NUTF2    | 10.67 | 2.8650E-02 |
| ENST00000414441 | MEPCE    | 10.67 | 3.9586E-03 |
| ENST00000475057 | SUPT3H   | 10.66 | 1.7358E-02 |
| ENST00000413150 | MAP4K4   | 10.66 | 2.8770E-02 |
| ENST00000560200 | EIF5     | 10.66 | 2.8770E-02 |
| ENST00000536615 | OGFOD2   | 10.66 | 2.8770E-02 |
| ENST00000522453 | EIF3H    | 10.65 | 2.8893E-02 |
| ENST00000628517 | BCLAF1   | 10.65 | 2.8893E-02 |
| ENST00000375060 | MAGED2   | 10.65 | 1.5631E-02 |
| ENST00000430372 | CYREN    | 10.65 | 3.0691E-02 |
| ENST00000648940 | None     | 10.65 | 1.4532E-02 |
| ENST00000392369 | RAN      | 10.64 | 2.6722E-03 |
| ENST00000432649 | EVA1A    | 10.64 | 2.8953E-02 |
| ENST00000475789 | STEAP1   | 10.64 | 2.8953E-02 |
| ENST00000488034 | CUTA     | 10.64 | 2.8953E-02 |
| ENST00000503306 | SMUG1    | 10.64 | 2.8953E-02 |
| ENST00000523107 | ERLIN2   | 10.64 | 2.8953E-02 |
| ENST00000565075 | RAB11A   | 10.64 | 2.8953E-02 |
| ENST00000292494 | LY6E     | 10.64 | 1.6413E-02 |
| ENST00000511338 | SEC31A   | 10.64 | 1.9245E-02 |
| ENST00000535813 | TMEM134  | 10.63 | 2.9093E-02 |
| ENST00000539074 | POLD4    | 10.63 | 2.9093E-02 |
| ENST00000641811 | PHGDH    | 10.63 | 2.9093E-02 |
| ENST00000405315 | NUCB1    | 10.63 | 2.9093E-02 |
| ENST00000327772 | NDUFA12  | 10.63 | 2.3047E-03 |
| ENST00000373703 | PEF1     | 10.63 | 1.6160E-02 |
| ENST00000460875 | DHX36    | 10.63 | 1.7854E-02 |
| ENST00000551983 | HSP90B1  | 10.63 | 1.4704E-02 |
| ENST00000380728 | GPS2     | 10.63 | 3.0877E-02 |
| ENST00000673265 | None     | 10.63 | 3.0877E-02 |
| ENST00000586339 | HDAC5    | 10.62 | 2.9234E-02 |
| ENST00000612212 | SELENOW  | 10.62 | 2.9234E-02 |
| ENST00000357997 | ANKLE2   | 10.62 | 1.4621E-02 |
| ENST00000312352 | PFKM     | 10.62 | 1.2245E-03 |
| ENST00000622144 | PAMR1    | 10.62 | 8.8641E-03 |
| ENST00000374038 | RBM39    | 10.62 | 8.9723E-03 |
| ENST00000269593 | IGFBP4   | 10.62 | 4.0108E-04 |
| ENST00000530446 | HTATIP   | 10.61 | 2.9300E-02 |
| ENST00000463190 | ITGB1BP1 | 10.61 | 2.9300E-02 |
| ENST00000478488 | NKTR     | 10.61 | 2.9300E-02 |
| ENST00000519721 | FAM91A1  | 10.61 | 2.9300E-02 |
| ENST00000534176 | UBXN1    | 10.61 | 2.9300E-02 |
| ENST00000368234 | NAXE     | 10.61 | 2.9300E-02 |
| ENST00000259457 | PSMB7    | 10.61 | 1.6207E-02 |

|                 |          |       |            |
|-----------------|----------|-------|------------|
| ENST00000372459 | CTSA     | 10.61 | 2.9409E-02 |
| ENST00000446158 | EBP      | 10.61 | 2.9409E-02 |
| ENST00000540977 | RFXANK   | 10.61 | 2.9409E-02 |
| ENST00000392008 | COPS8    | 10.61 | 3.1072E-02 |
| ENST00000568288 | UBE2I    | 10.60 | 2.9542E-02 |
| ENST00000584027 | NBPF9    | 10.60 | 2.9542E-02 |
| ENST00000632872 | PUF60    | 10.60 | 2.9542E-02 |
| ENST00000579618 | SNRPD1   | 10.60 | 2.9542E-02 |
| ENST00000266659 | GLIPR1   | 10.59 | 7.4866E-03 |
| ENST00000610127 | TXNDC12  | 10.59 | 2.9642E-02 |
| ENST00000672656 | IFT46    | 10.59 | 2.9642E-02 |
| ENST00000343484 | TCEA2    | 10.59 | 2.9642E-02 |
| ENST00000261813 | PFDN1    | 10.58 | 9.1765E-03 |
| ENST00000551224 | WASHC4   | 10.58 | 1.8476E-02 |
| ENST00000378875 | ALKBH6   | 10.58 | 2.9809E-02 |
| ENST00000439527 | UBA2     | 10.58 | 2.9809E-02 |
| ENST00000332556 | LAMP1    | 10.58 | 7.3677E-03 |
| ENST00000581486 | NCOA4    | 10.58 | 1.6409E-02 |
| ENST00000462320 | NFU1     | 10.57 | 2.0081E-02 |
| ENST00000470529 | BSCL2    | 10.57 | 2.9946E-02 |
| ENST00000626119 | COPS7A   | 10.57 | 2.9946E-02 |
| ENST00000520813 | EIF3H    | 10.57 | 2.9946E-02 |
| ENST00000543672 | DCTN2    | 10.57 | 2.9946E-02 |
| ENST00000613082 | CYP1B1   | 10.57 | 2.9946E-02 |
| ENST00000561741 | DEF8     | 10.57 | 1.8613E-02 |
| ENST00000613570 | CACYBP   | 10.56 | 3.1651E-02 |
| ENST00000429018 | GOLGA4   | 10.56 | 3.1651E-02 |
| ENST00000409856 | CCDC74A  | 10.56 | 1.8663E-02 |
| ENST00000567671 | RAB11A   | 10.56 | 1.8663E-02 |
| ENST00000514251 | ZBTB38   | 10.56 | 1.8595E-02 |
| ENST00000471167 | PRPF40A  | 10.56 | 3.0090E-02 |
| ENST00000481580 | RALY     | 10.56 | 3.0090E-02 |
| ENST00000534515 | POLD4    | 10.56 | 3.0090E-02 |
| ENST00000476522 | PRRC2C   | 10.56 | 3.0090E-02 |
| ENST00000319041 | SH3BGRL3 | 10.56 | 1.1983E-02 |
| ENST00000317734 | SLC35C2  | 10.55 | 3.0197E-02 |
| ENST00000468372 | MAD1L1   | 10.55 | 3.0197E-02 |
| ENST00000489164 | PEF1     | 10.55 | 3.0197E-02 |
| ENST00000219789 | CDIPT    | 10.54 | 3.0319E-02 |
| ENST00000514554 | TGFBI    | 10.54 | 3.0319E-02 |
| ENST00000550482 | HNRNPA1  | 10.54 | 3.0319E-02 |
| ENST00000599833 | SHKBP1   | 10.54 | 3.0319E-02 |
| ENST00000489344 | RBM3     | 10.53 | 8.8384E-03 |
| ENST00000437412 | PLAGL1   | 10.53 | 1.5732E-02 |
| ENST00000590964 | METTTL23 | 10.53 | 3.0456E-02 |

|                 |          |       |            |
|-----------------|----------|-------|------------|
| ENST00000438997 | FAM9C    | 10.53 | 3.0456E-02 |
| ENST00000473132 | TOMM20   | 10.53 | 3.0456E-02 |
| ENST00000598555 | FLT3LG   | 10.53 | 3.0456E-02 |
| ENST00000448943 | TWIST2   | 10.53 | 3.0456E-02 |
| ENST00000671947 | TWIST2   | 10.53 | 3.0456E-02 |
| ENST00000633965 | PSAP     | 10.52 | 8.0416E-03 |
| ENST00000614381 | None     | 10.52 | 3.2195E-02 |
| ENST00000400609 | ABCF1    | 10.52 | 3.0623E-02 |
| ENST00000456791 | ABCF1    | 10.52 | 3.0623E-02 |
| ENST00000457970 | ABCF1    | 10.52 | 3.0623E-02 |
| ENST00000416932 | ABCF1    | 10.52 | 3.0623E-02 |
| ENST00000377191 | XRN2     | 10.51 | 8.4017E-03 |
| ENST00000438068 | UBE2K    | 10.51 | 3.0700E-02 |
| ENST00000466207 | None     | 10.51 | 3.0700E-02 |
| ENST00000473167 | None     | 10.51 | 3.0700E-02 |
| ENST00000480913 | DDAH2    | 10.51 | 3.0700E-02 |
| ENST00000488668 | None     | 10.51 | 3.0700E-02 |
| ENST00000490871 | None     | 10.51 | 3.0700E-02 |
| ENST00000493926 | None     | 10.51 | 3.0700E-02 |
| ENST00000494351 | None     | 10.51 | 3.0700E-02 |
| ENST00000561217 | TNFAIP2  | 10.51 | 3.0700E-02 |
| ENST00000644388 | SERPINB6 | 10.51 | 3.0700E-02 |
| ENST00000369638 | RHOC     | 10.50 | 3.0852E-02 |
| ENST00000522434 | TM2D2    | 10.50 | 3.0852E-02 |
| ENST00000396388 | TSEN34   | 10.50 | 3.0852E-02 |
| ENST00000285021 | XPC      | 10.49 | 1.7517E-02 |
| ENST00000525684 | C11orf58 | 10.49 | 1.4353E-02 |
| ENST00000246747 | ARL2     | 10.49 | 3.5973E-03 |
| ENST00000375534 | MFAP2    | 10.49 | 3.0929E-02 |
| ENST00000335171 | ERLIN2   | 10.49 | 3.0929E-02 |
| ENST00000420692 | CTSB     | 10.49 | 3.0929E-02 |
| ENST00000468006 | MRPL9    | 10.49 | 3.0929E-02 |
| ENST00000529771 | NARS2    | 10.49 | 3.0929E-02 |
| ENST00000555793 | GOLGA5   | 10.49 | 3.0929E-02 |
| ENST00000314922 | PENK     | 10.48 | 1.9706E-02 |
| ENST00000477116 | COA8     | 10.48 | 3.2838E-02 |
| ENST00000220847 | PHF20L1  | 10.48 | 3.1038E-02 |
| ENST00000343820 | TGIF1    | 10.48 | 3.1038E-02 |
| ENST00000367321 | MTHFD1L  | 10.48 | 3.1038E-02 |
| ENST00000470287 | FUBP1    | 10.48 | 3.1038E-02 |
| ENST00000588297 | GLYR1    | 10.48 | 3.1038E-02 |
| ENST00000616395 | TRAPPC3  | 10.48 | 3.1038E-02 |
| ENST00000456128 | TOM1     | 10.48 | 3.1038E-02 |
| ENST00000482434 | VEPH1    | 10.47 | 1.9883E-02 |
| ENST00000259154 | KCTD3    | 10.47 | 1.7976E-02 |

|                 |          |       |            |
|-----------------|----------|-------|------------|
| ENST00000475894 | DLGAP4   | 10.47 | 1.7991E-02 |
| ENST00000505423 | AP3S1    | 10.47 | 1.9963E-02 |
| ENST00000231504 | PPP2CA   | 10.47 | 3.1165E-02 |
| ENST00000372492 | CFAP57   | 10.47 | 3.1165E-02 |
| ENST00000527637 | CASP4LP  | 10.47 | 3.1165E-02 |
| ENST00000625311 | CAAP1    | 10.47 | 3.1165E-02 |
| ENST00000369124 | PLEKHO1  | 10.46 | 9.3492E-03 |
| ENST00000376327 | PLP2     | 10.46 | 8.6521E-03 |
| ENST00000508658 | SNX14    | 10.46 | 2.1740E-02 |
| ENST00000458500 | RPL10    | 10.46 | 1.1653E-02 |
| ENST00000396062 | FKBP3    | 10.46 | 1.8294E-02 |
| ENST00000345896 | CERS2    | 10.45 | 3.1301E-02 |
| ENST00000381760 | UCHL1    | 10.45 | 3.1301E-02 |
| ENST00000480563 | TTC28    | 10.45 | 3.1301E-02 |
| ENST00000544637 | SPX      | 10.45 | 3.1301E-02 |
| ENST00000421109 | NR2F2    | 10.45 | 3.1301E-02 |
| ENST00000336023 | TUBA1B   | 10.45 | 2.8941E-03 |
| ENST00000574444 | C1QBP    | 10.45 | 2.2192E-02 |
| ENST00000234677 | SARS1    | 10.45 | 9.1561E-03 |
| ENST00000618908 | LAP3     | 10.45 | 1.7991E-02 |
| ENST00000443297 | ACTR3    | 10.44 | 3.1439E-02 |
| ENST00000507382 | TMEM92   | 10.44 | 3.1439E-02 |
| ENST00000533403 | CD59     | 10.44 | 3.1439E-02 |
| ENST00000646643 | CLPP     | 10.44 | 3.1439E-02 |
| ENST00000439267 | BCL2L1   | 10.44 | 2.1912E-02 |
| ENST00000528437 | CASP4LP  | 10.43 | 3.1639E-02 |
| ENST00000546672 | SDSL     | 10.43 | 3.1639E-02 |
| ENST00000462160 | STK32C   | 10.43 | 3.1639E-02 |
| ENST00000483534 | UBE2V1   | 10.43 | 3.3590E-02 |
| ENST00000367495 | RAB32    | 10.43 | 9.9940E-03 |
| ENST00000327773 | GAS6     | 10.42 | 1.0306E-02 |
| ENST00000572585 | ABR      | 10.42 | 4.2773E-03 |
| ENST00000628336 | ABR      | 10.42 | 4.2773E-03 |
| ENST00000629638 | ABR      | 10.42 | 4.2773E-03 |
| ENST00000278919 | FEZ1     | 10.42 | 3.1738E-02 |
| ENST00000478100 | NCBP1    | 10.42 | 3.1738E-02 |
| ENST00000493378 | ARF4     | 10.42 | 3.1738E-02 |
| ENST00000506521 | BDH2     | 10.42 | 3.1738E-02 |
| ENST00000456705 | PWP2     | 10.42 | 3.1738E-02 |
| ENST00000313386 | RMND5B   | 10.42 | 3.1738E-02 |
| ENST00000477661 | AKR1C1   | 10.42 | 3.6220E-03 |
| ENST00000421656 | RANBP1   | 10.41 | 3.1904E-02 |
| ENST00000435456 | SLC25A17 | 10.41 | 3.1904E-02 |
| ENST00000495168 | TCEA2    | 10.41 | 3.1904E-02 |
| ENST00000544883 | NR2C2AP  | 10.41 | 3.1904E-02 |

|                 |          |       |            |
|-----------------|----------|-------|------------|
| ENST00000642285 | DNAJC21  | 10.41 | 3.3955E-02 |
| ENST00000371123 | SMARCA1  | 10.41 | 2.2396E-02 |
| ENST00000504279 | DHX15    | 10.40 | 1.7292E-02 |
| ENST00000509031 | PPA2     | 10.40 | 3.2040E-02 |
| ENST00000538026 | SPARC    | 10.40 | 3.2040E-02 |
| ENST00000541412 | TMEM14C  | 10.40 | 3.2040E-02 |
| ENST00000642513 | TMEM14C  | 10.40 | 3.2040E-02 |
| ENST00000428892 | APOBEC3C | 10.39 | 2.3798E-02 |
| ENST00000547969 | NAP1L1   | 10.39 | 1.9565E-02 |
| ENST00000576553 | POLR2A   | 10.39 | 2.1065E-02 |
| ENST00000505548 | UBE2D2   | 10.39 | 1.9591E-02 |
| ENST00000431250 | MTMR14   | 10.39 | 3.2181E-02 |
| ENST00000504797 | SMUG1    | 10.39 | 3.2181E-02 |
| ENST00000525649 | MTCH2    | 10.39 | 3.2181E-02 |
| ENST00000643736 | None     | 10.39 | 3.2181E-02 |
| ENST00000216190 | EIF3D    | 10.39 | 9.8002E-03 |
| ENST00000361505 | PNP      | 10.38 | 2.3368E-02 |
| ENST00000489056 | UQCRH    | 10.38 | 3.4319E-02 |
| ENST00000508775 | RNASET2  | 10.38 | 3.4319E-02 |
| ENST00000646474 | CCDC88A  | 10.38 | 3.4319E-02 |
| ENST00000622375 | None     | 10.38 | 9.6851E-03 |
| ENST00000541630 | RAN      | 10.38 | 8.9195E-04 |
| ENST00000483713 | POLR2F   | 10.38 | 3.2370E-02 |
| ENST00000511289 | ARFIP1   | 10.38 | 3.2370E-02 |
| ENST00000523131 | YWHAZ    | 10.38 | 3.2370E-02 |
| ENST00000534113 | SECISBP2 | 10.38 | 3.2370E-02 |
| ENST00000341942 | LAMTOR4  | 10.38 | 3.7610E-03 |
| ENST00000484841 | ACTB     | 10.37 | 1.4501E-02 |
| ENST00000291294 | PTGIR    | 10.37 | 2.1350E-02 |
| ENST00000449964 | RBSN     | 10.37 | 3.2589E-02 |
| ENST00000318407 | BOK      | 10.36 | 9.8188E-03 |
| ENST00000472150 | ARHGAP21 | 10.36 | 2.0035E-02 |
| ENST00000527009 | SCYL1    | 10.36 | 2.1541E-02 |
| ENST00000392622 | S100A13  | 10.36 | 3.4751E-02 |
| ENST00000304979 | PPIH     | 10.36 | 3.4751E-02 |
| ENST00000295530 | FLAD1    | 10.36 | 3.2686E-02 |
| ENST00000316804 | GRB2     | 10.36 | 3.2686E-02 |
| ENST00000392594 | THYN1    | 10.36 | 3.2686E-02 |
| ENST00000413890 | KTN1     | 10.36 | 3.2686E-02 |
| ENST00000503326 | COPB2    | 10.36 | 3.2686E-02 |
| ENST00000527344 | CFL1     | 10.36 | 3.2686E-02 |
| ENST00000622235 | SCARF2   | 10.36 | 3.2686E-02 |
| ENST00000671868 | AIMP1    | 10.36 | 3.2686E-02 |
| ENST00000376055 | BCL2L1   | 10.36 | 1.9176E-02 |
| ENST00000541996 | YTHDF2   | 10.36 | 2.1604E-02 |

|                 |          |       |            |
|-----------------|----------|-------|------------|
| ENST00000379751 | CENPB    | 10.35 | 9.4206E-03 |
| ENST00000439395 | SPATS2L  | 10.35 | 1.8023E-02 |
| ENST00000322569 | MMP19    | 10.34 | 3.2838E-02 |
| ENST00000311141 | ZFYVE21  | 10.34 | 3.2838E-02 |
| ENST00000436384 | CD36     | 10.34 | 3.2838E-02 |
| ENST00000531366 | TMEM126A | 10.34 | 3.2838E-02 |
| ENST00000575605 | DERL2    | 10.34 | 3.2838E-02 |
| ENST00000583380 | SKA2     | 10.34 | 3.2838E-02 |
| ENST00000543683 | NDUFB10  | 10.34 | 2.0125E-02 |
| ENST00000472851 | PEX14    | 10.34 | 2.1814E-02 |
| ENST00000490289 | UBE2V1   | 10.33 | 3.5228E-02 |
| ENST00000538954 | STOM     | 10.33 | 3.5228E-02 |
| ENST00000419477 | YWHAZ    | 10.33 | 3.3027E-02 |
| ENST00000527718 | PABPC4   | 10.33 | 3.3027E-02 |
| ENST00000565777 | MAZ      | 10.33 | 3.3027E-02 |
| ENST00000602997 | AKR1C3   | 10.33 | 3.3027E-02 |
| ENST00000538434 | EIF3K    | 10.33 | 1.2587E-02 |
| ENST00000634857 | None     | 10.33 | 1.2587E-02 |
| ENST00000405489 | ATRAID   | 10.32 | 2.3565E-02 |
| ENST00000431534 | POLR3H   | 10.32 | 3.3220E-02 |
| ENST00000618312 | MTHFD1L  | 10.32 | 1.0530E-02 |
| ENST00000460191 | DNTTIP2  | 10.32 | 2.2081E-02 |
| ENST00000482525 | RAB7A    | 10.32 | 2.0576E-02 |
| ENST00000543369 | MFAP5    | 10.31 | 3.3443E-02 |
| ENST00000508623 | QDPR     | 10.31 | 2.0764E-02 |
| ENST00000453270 | NR2F2    | 10.31 | 2.2252E-02 |
| ENST00000340384 | TUBB4B   | 10.30 | 3.5201E-03 |
| ENST00000547869 | SLC25A3  | 10.30 | 1.6377E-02 |
| ENST00000501272 | ANXA5    | 10.30 | 2.2192E-02 |
| ENST00000578845 | CDKN2A   | 10.30 | 1.0426E-02 |
| ENST00000409181 | SUMO1    | 10.30 | 3.3590E-02 |
| ENST00000471276 | TMEM198B | 10.30 | 3.3590E-02 |
| ENST00000487482 | MAGED2   | 10.30 | 3.3590E-02 |
| ENST00000519186 | TM2D2    | 10.30 | 3.3590E-02 |
| ENST00000564091 | CLN3     | 10.30 | 3.3590E-02 |
| ENST00000596362 | CALM3    | 10.30 | 3.3590E-02 |
| ENST00000651853 | RIT1     | 10.30 | 3.3590E-02 |
| ENST00000373292 | HDLBP    | 10.29 | 1.0519E-02 |
| ENST00000488607 | ZCCHC7   | 10.29 | 3.3793E-02 |
| ENST00000522887 | EIF3E    | 10.29 | 3.3793E-02 |
| ENST00000314475 | TLCD5    | 10.29 | 3.3793E-02 |
| ENST00000345807 | CLTB     | 10.29 | 2.1912E-02 |
| ENST00000440064 | RSF1     | 10.28 | 4.2882E-03 |
| ENST00000493562 | MTMR11   | 10.28 | 2.2626E-02 |
| ENST00000425361 | MZT2B    | 10.27 | 3.3955E-02 |

|                 |          |       |            |
|-----------------|----------|-------|------------|
| ENST00000429220 | ZPR1     | 10.27 | 3.3955E-02 |
| ENST00000505120 | CDC23    | 10.27 | 3.3955E-02 |
| ENST00000542907 | CWC15    | 10.27 | 3.3955E-02 |
| ENST00000542923 | WASHC3   | 10.27 | 3.3955E-02 |
| ENST00000547439 | APPL2    | 10.27 | 3.3955E-02 |
| ENST00000611958 | None     | 10.27 | 3.3955E-02 |
| ENST00000467954 | FTSJ1    | 10.27 | 2.2744E-02 |
| ENST00000498522 | TESK1    | 10.27 | 2.0699E-02 |
| ENST00000397426 | FBXO7    | 10.26 | 3.4145E-02 |
| ENST00000559145 | RORA     | 10.26 | 3.4145E-02 |
| ENST00000541640 | PRKAB1   | 10.26 | 3.4145E-02 |
| ENST00000377921 | RSU1     | 10.26 | 3.4145E-02 |
| ENST00000477609 | FLAD1    | 10.26 | 2.1541E-02 |
| ENST00000492656 | ADAMTS1  | 10.26 | 3.6657E-02 |
| ENST00000602624 | DDOST    | 10.25 | 1.9300E-02 |
| ENST00000355346 | ITGB1BP1 | 10.25 | 3.4319E-02 |
| ENST00000373547 | PPP6C    | 10.25 | 3.4319E-02 |
| ENST00000419113 | NDUFA3   | 10.25 | 3.4319E-02 |
| ENST00000492991 | C9orf78  | 10.25 | 3.4319E-02 |
| ENST00000620289 | None     | 10.25 | 3.4319E-02 |
| ENST00000261811 | CYSTM1   | 10.25 | 1.0354E-02 |
| ENST00000534358 | KMT2A    | 10.25 | 3.5691E-03 |
| ENST00000529191 | FTH1     | 10.25 | 1.5105E-02 |
| ENST00000427084 | SLC25A17 | 10.24 | 3.4552E-02 |
| ENST00000488451 | ITGB1BP1 | 10.24 | 3.4552E-02 |
| ENST00000551673 | YARS2    | 10.24 | 3.4552E-02 |
| ENST00000560202 | USP3     | 10.23 | 3.7020E-02 |
| ENST00000442995 | HYPK     | 10.23 | 1.4009E-02 |
| ENST00000631496 | CCL18    | 10.23 | 3.4762E-02 |
| ENST00000470286 | DYNC1I2  | 10.23 | 3.4762E-02 |
| ENST00000496013 | FBH1     | 10.23 | 3.4762E-02 |
| ENST00000616474 | CCL18    | 10.23 | 3.4762E-02 |
| ENST00000649847 | DVL3     | 10.23 | 3.4762E-02 |
| ENST00000395850 | CD59     | 10.22 | 3.0018E-03 |
| ENST00000672586 | ASL      | 10.22 | 1.1888E-02 |
| ENST00000372556 | PPCS     | 10.22 | 4.7000E-03 |
| ENST00000490140 | FDPS     | 10.21 | 4.2671E-03 |
| ENST00000481633 | MAD1L1   | 10.21 | 3.5045E-02 |
| ENST00000413907 | AEBP1    | 10.21 | 1.1967E-02 |
| ENST00000550898 | KRR1     | 10.21 | 2.2174E-02 |
| ENST00000476847 | CPB1     | 10.21 | 2.3693E-02 |
| ENST00000479050 | SLC25A20 | 10.21 | 2.3693E-02 |
| ENST00000288532 | COQ5     | 10.21 | 2.2090E-02 |
| ENST00000313104 | RPLP0    | 10.20 | 1.2231E-02 |
| ENST00000631679 | DVL1     | 10.20 | 2.5687E-02 |



|                 |          |       |            |
|-----------------|----------|-------|------------|
| ENST00000596702 | ZNF611   | 10.20 | 3.5305E-02 |
| ENST00000377104 | SPRY2    | 10.20 | 2.1590E-02 |
| ENST00000471426 | RBMS3    | 10.20 | 8.5809E-03 |
| ENST00000576579 | SAT2     | 10.20 | 2.2359E-02 |
| ENST00000221466 | FCGRT    | 10.19 | 2.3092E-02 |
| ENST00000564910 | RAB11A   | 10.19 | 2.1665E-02 |
| ENST00000278353 | HSD17B12 | 10.19 | 3.5570E-02 |
| ENST00000350435 | UBE2D3   | 10.19 | 3.5570E-02 |
| ENST00000559234 | ZHX3     | 10.19 | 3.5570E-02 |
| ENST00000506799 | NLN      | 10.19 | 2.1875E-02 |
| ENST00000370151 | DPCD     | 10.18 | 2.6090E-02 |
| ENST00000531323 | UQCC3    | 10.18 | 3.7905E-02 |
| ENST00000314250 | TNS2     | 10.18 | 3.5812E-02 |
| ENST00000320307 | TAGLN2   | 10.18 | 3.5812E-02 |
| ENST00000357402 | MVP      | 10.17 | 1.0525E-02 |
| ENST00000570828 | CTDNEP1  | 10.17 | 1.6799E-02 |
| ENST00000672576 | CTDNEP1  | 10.17 | 1.6799E-02 |
| ENST00000597020 | AP2S1    | 10.16 | 5.1935E-03 |
| ENST00000451553 | KLHL22   | 10.16 | 2.4448E-02 |
| ENST00000367108 | DYRK3    | 10.16 | 3.5976E-02 |
| ENST00000307145 | KLF13    | 10.16 | 3.5976E-02 |
| ENST00000434727 | DPCD     | 10.16 | 3.5976E-02 |
| ENST00000444761 | MCFD2    | 10.16 | 3.5976E-02 |
| ENST00000488731 | MUTYH    | 10.16 | 3.5976E-02 |
| ENST00000491206 | RFC2     | 10.16 | 3.5976E-02 |
| ENST00000531741 | VPS26B   | 10.16 | 3.5976E-02 |
| ENST00000672401 | ACSL4    | 10.16 | 3.5976E-02 |
| ENST00000270824 | EVA1B    | 10.16 | 1.1107E-02 |
| ENST00000462990 | PPP2R1A  | 10.16 | 2.3964E-02 |
| ENST00000462965 | ARPC5    | 10.15 | 5.3364E-03 |
| ENST00000522997 | IMPA1    | 10.15 | 3.6201E-02 |
| ENST00000453973 | CAPG     | 10.15 | 2.2359E-02 |
| ENST00000470551 | DNAJC5   | 10.15 | 3.8387E-02 |
| ENST00000617480 | None     | 10.15 | 3.8387E-02 |
| ENST00000475996 | HLA-F    | 10.15 | 2.4714E-02 |
| ENST00000220659 | BRF2     | 10.14 | 1.8434E-02 |
| ENST00000558311 | WDR61    | 10.14 | 2.2434E-02 |
| ENST00000446331 | FDFT1    | 10.14 | 2.3199E-02 |
| ENST00000528628 | CRYAB    | 10.14 | 2.3199E-02 |
| ENST00000613280 | None     | 10.14 | 2.3199E-02 |
| ENST00000597611 | FKBP8    | 10.14 | 3.6484E-02 |
| ENST00000612800 | CIB1     | 10.13 | 2.2561E-02 |
| ENST00000634600 | SEPTIN7  | 10.13 | 2.3199E-02 |
| ENST00000511526 | ACAD9    | 10.12 | 1.2084E-02 |
| ENST00000458442 | TCEA2    | 10.12 | 3.6676E-02 |

|                 |           |       |            |
|-----------------|-----------|-------|------------|
| ENST00000476103 | DNAJC1    | 10.12 | 3.6676E-02 |
| ENST00000492366 | BDH2      | 10.12 | 3.6676E-02 |
| ENST00000549106 | ALDH2     | 10.12 | 3.6676E-02 |
| ENST00000557961 | MORF4L1   | 10.12 | 3.6676E-02 |
| ENST00000590339 | VPS25     | 10.12 | 3.6676E-02 |
| ENST00000464553 | SSNA1     | 10.12 | 3.6676E-02 |
| ENST00000512621 | ADH5      | 10.12 | 2.3515E-02 |
| ENST00000316757 | APBA3     | 10.11 | 2.3565E-02 |
| ENST00000308961 | NDUFA11   | 10.11 | 3.4690E-03 |
| ENST00000344537 | DTNBP1    | 10.11 | 3.6859E-02 |
| ENST00000464275 | PDLIM2    | 10.11 | 3.6859E-02 |
| ENST00000486138 | CAMTA1    | 10.11 | 3.6859E-02 |
| ENST00000506847 | SNX2      | 10.11 | 3.6859E-02 |
| ENST00000533115 | ZNRD2     | 10.11 | 3.6859E-02 |
| ENST00000586539 | ABCA8     | 10.11 | 3.6859E-02 |
| ENST00000587902 | ATP5F1A   | 10.11 | 3.6859E-02 |
| ENST00000596386 | PSMC4     | 10.11 | 3.6859E-02 |
| ENST00000625352 | None      | 10.11 | 3.6859E-02 |
| ENST00000580018 | TIMM23    | 10.10 | 2.4448E-02 |
| ENST00000560793 | CERS2     | 10.10 | 1.3013E-02 |
| ENST00000037243 | GABARAPL2 | 10.10 | 2.3693E-02 |
| ENST00000400093 | ATP5PF    | 10.10 | 3.7131E-02 |
| ENST00000520187 | CAAP1     | 10.10 | 3.7131E-02 |
| ENST00000587735 | PRELID3A  | 10.10 | 3.7131E-02 |
| ENST00000300181 | TSC22D4   | 10.09 | 2.2935E-02 |
| ENST00000525690 | RPS3      | 10.08 | 2.1814E-02 |
| ENST00000252984 | ALKBH6    | 10.08 | 3.7352E-02 |
| ENST00000445667 | None      | 10.08 | 3.7352E-02 |
| ENST00000509769 | USP53     | 10.08 | 3.7352E-02 |
| ENST00000544702 | C1RL      | 10.08 | 3.7352E-02 |
| ENST00000614830 | NOP16     | 10.08 | 3.7352E-02 |
| ENST00000672447 | None      | 10.08 | 3.7352E-02 |
| ENST00000472127 | NKTR      | 10.08 | 1.4740E-02 |
| ENST00000543988 | OTUB1     | 10.08 | 1.2587E-02 |
| ENST00000529806 | RPS2      | 10.07 | 4.2790E-03 |
| ENST00000458159 | ACTA2     | 10.07 | 2.6116E-02 |
| ENST00000607062 | ASNSD1    | 10.07 | 3.7579E-02 |
| ENST00000361278 | TBRG4     | 10.07 | 3.7579E-02 |
| ENST00000458153 | MKLN1     | 10.07 | 3.7579E-02 |
| ENST00000262746 | PRDX1     | 10.07 | 3.7579E-02 |
| ENST00000373095 | FAM102A   | 10.07 | 2.4332E-02 |
| ENST00000393196 | NME1      | 10.07 | 1.1114E-02 |
| ENST00000282388 | ZFP36L2   | 10.07 | 8.9723E-03 |
| ENST00000317483 | RAB23     | 10.06 | 1.1918E-02 |
| ENST00000634045 | None      | 10.06 | 1.5211E-02 |

|                 |           |       |            |
|-----------------|-----------|-------|------------|
| ENST00000632449 | None      | 10.06 | 3.9966E-02 |
| ENST00000409500 | GSTK1     | 10.05 | 3.7754E-02 |
| ENST00000483770 | PABPC4    | 10.05 | 3.7754E-02 |
| ENST00000518974 | PENK      | 10.05 | 3.7754E-02 |
| ENST00000524000 | FBXO32    | 10.05 | 3.7754E-02 |
| ENST00000542279 | GTF2H3    | 10.05 | 3.7754E-02 |
| ENST00000614395 | TMEM191B  | 10.05 | 3.7754E-02 |
| ENST00000369651 | NT5E      | 10.05 | 3.7754E-02 |
| ENST00000429498 | DDX59     | 10.05 | 2.8277E-02 |
| ENST00000266458 | GABARAPL1 | 10.05 | 1.4150E-02 |
| ENST00000268603 | CDH11     | 10.05 | 2.7779E-02 |
| ENST00000368317 | RSPO3     | 10.04 | 2.7859E-02 |
| ENST00000619718 | None      | 10.04 | 2.8724E-02 |
| ENST00000367429 | CFH       | 10.04 | 2.2366E-02 |
| ENST00000396894 | FTSJ1     | 10.04 | 3.8059E-02 |
| ENST00000316615 | GRB2      | 10.04 | 3.8059E-02 |
| ENST00000401987 | PPP1R7    | 10.04 | 3.8059E-02 |
| ENST00000651325 | SLC66A1L  | 10.04 | 3.8059E-02 |
| ENST00000355426 | EFEMP1    | 10.04 | 1.1152E-03 |
| ENST00000564677 | HEXA      | 10.03 | 2.0025E-02 |
| ENST00000463472 | ODF3B     | 10.03 | 4.0551E-02 |
| ENST00000424616 | None      | 10.03 | 3.8279E-02 |
| ENST00000442966 | RPP21     | 10.03 | 3.8279E-02 |
| ENST00000515114 | MCUB      | 10.03 | 3.8279E-02 |
| ENST00000531593 | GPAA1     | 10.03 | 3.8279E-02 |
| ENST00000593646 | RNASEK    | 10.02 | 4.6716E-03 |
| ENST00000407627 | ELAVL1    | 10.01 | 1.1970E-02 |
| ENST00000460910 | NKTR      | 10.01 | 3.8529E-02 |
| ENST00000526522 | RPS2      | 10.01 | 3.8529E-02 |
| ENST00000551143 | LMBR1L    | 10.01 | 3.8529E-02 |
| ENST00000571874 | ANAPC11   | 10.01 | 3.8529E-02 |
| ENST00000579248 | RPL17     | 10.01 | 3.8529E-02 |
| ENST00000586967 | CALR      | 10.01 | 7.3828E-03 |
| ENST00000367294 | ARMT1     | 10.00 | 2.7319E-02 |
| ENST00000375549 | SDHD      | 10.00 | 2.8016E-02 |
| ENST00000395808 | MED16     | 10.00 | 2.4670E-02 |
| ENST00000436812 | IGFBP2    | 10.00 | 4.1063E-02 |
| ENST00000539672 | RECQL     | 10.00 | 4.1063E-02 |
| ENST00000570259 | HSBP1     | 10.00 | 4.1063E-02 |
| ENST00000589695 | TREM1     | 10.00 | 4.1063E-02 |
| ENST00000484464 | ACP1      | 10.00 | 2.5617E-02 |
| ENST00000396070 | RPL30     | 10.00 | 3.8828E-02 |
| ENST00000573786 | OXLD1     | 10.00 | 3.8828E-02 |
| ENST00000366987 | ATF3      | 10.00 | 1.3483E-02 |
| ENST00000509082 | SDHA      | 9.99  | 1.7606E-02 |

|                 |         |      |            |
|-----------------|---------|------|------------|
| ENST00000308982 | ACAD9   | 9.98 | 3.9119E-02 |
| ENST00000368299 | LMNA    | 9.98 | 3.9119E-02 |
| ENST00000496655 | COPRS   | 9.98 | 3.9119E-02 |
| ENST00000513740 | SLC49A3 | 9.98 | 3.9119E-02 |
| ENST00000519386 | MRPS28  | 9.98 | 3.9119E-02 |
| ENST00000528680 | DNTTIP2 | 9.98 | 3.9119E-02 |
| ENST00000593547 | PEX11G  | 9.98 | 3.9119E-02 |
| ENST00000622051 | TSC22D1 | 9.98 | 1.5671E-02 |
| ENST00000492245 | SAP18   | 9.98 | 1.4925E-02 |
| ENST00000368097 | TAGLN2  | 9.98 | 2.1107E-03 |
| ENST00000297268 | COL1A2  | 9.98 | 1.2527E-03 |
| ENST00000570099 | YPEL3   | 9.97 | 2.9300E-02 |
| ENST00000345436 | CKLF    | 9.97 | 3.9417E-02 |
| ENST00000412390 | ZNF143  | 9.97 | 3.9417E-02 |
| ENST00000561248 | COPS2   | 9.97 | 3.9417E-02 |
| ENST00000574322 | CTDNEP1 | 9.97 | 3.9417E-02 |
| ENST00000620044 | None    | 9.97 | 3.9417E-02 |
| ENST00000672741 | None    | 9.97 | 3.9417E-02 |
| ENST00000383434 | None    | 9.97 | 4.1678E-02 |
| ENST00000418032 | GATAD2A | 9.97 | 4.1678E-02 |
| ENST00000453899 | None    | 9.97 | 4.1678E-02 |
| ENST00000407006 | RANGRF  | 9.96 | 1.0295E-02 |
| ENST00000469435 | KLF6    | 9.96 | 2.6276E-02 |
| ENST00000401394 | CTCF    | 9.95 | 3.9622E-02 |
| ENST00000417410 | SMIM19  | 9.95 | 3.9622E-02 |
| ENST00000549184 | HEATR5A | 9.95 | 3.9622E-02 |
| ENST00000549966 | TMBIM6  | 9.95 | 3.9622E-02 |
| ENST00000597959 | None    | 9.95 | 3.9622E-02 |
| ENST00000380872 | AKR1C1  | 9.95 | 3.6434E-03 |
| ENST00000393580 | RELT    | 9.95 | 2.9587E-02 |
| ENST00000262193 | PSMB1   | 9.95 | 1.4353E-02 |
| ENST00000532672 | BIRC2   | 9.94 | 2.9263E-02 |
| ENST00000578809 | ACADVL  | 9.94 | 7.6275E-03 |
| ENST00000338517 | SCOC    | 9.94 | 3.9890E-02 |
| ENST00000490576 | CYP1B1  | 9.94 | 3.9890E-02 |
| ENST00000496468 | TSSC4   | 9.94 | 3.9890E-02 |
| ENST00000515687 | STX18   | 9.94 | 3.9890E-02 |
| ENST00000530485 | BSDC1   | 9.94 | 3.9890E-02 |
| ENST00000629123 | None    | 9.94 | 3.9890E-02 |
| ENST00000523688 | NKD2    | 9.94 | 3.9890E-02 |
| ENST00000483407 | CSDE1   | 9.94 | 1.8294E-02 |
| ENST00000431380 | SPON2   | 9.93 | 4.2342E-02 |
| ENST00000482168 | PPCS    | 9.93 | 4.2342E-02 |
| ENST00000567114 | RPUSD1  | 9.93 | 4.2342E-02 |
| ENST00000420712 | RPL37A  | 9.93 | 1.5606E-02 |

|                 |          |      |            |
|-----------------|----------|------|------------|
| ENST00000338435 | GLS      | 9.93 | 2.5547E-02 |
| ENST00000621366 | KIZ      | 9.93 | 2.6598E-02 |
| ENST00000300875 | DACT3    | 9.93 | 2.6078E-02 |
| ENST00000367114 | EIF2D    | 9.92 | 4.0167E-02 |
| ENST00000469699 | MADD     | 9.92 | 4.0167E-02 |
| ENST00000486135 | MCEE     | 9.92 | 4.0167E-02 |
| ENST00000525600 | KAT5     | 9.92 | 4.0167E-02 |
| ENST00000436160 | SPCS2P4  | 9.92 | 4.0167E-02 |
| ENST00000474253 | TPI1     | 9.92 | 1.5671E-02 |
| ENST00000284440 | UCHL1    | 9.92 | 3.0289E-02 |
| ENST00000534032 | FIBP     | 9.92 | 7.3272E-03 |
| ENST00000334743 | PPP2R5C  | 9.92 | 1.9407E-02 |
| ENST00000592388 | VAT1     | 9.92 | 1.0087E-02 |
| ENST00000340748 | DNMT1    | 9.91 | 4.0491E-02 |
| ENST00000463219 | MGME1    | 9.91 | 4.0491E-02 |
| ENST00000484412 | HDLBP    | 9.91 | 4.0491E-02 |
| ENST00000419610 | RBM6     | 9.91 | 4.0491E-02 |
| ENST00000541272 | UBC      | 9.91 | 3.0197E-02 |
| ENST00000453310 | RBM39    | 9.90 | 1.8304E-02 |
| ENST00000541738 | PREPL    | 9.90 | 4.3011E-02 |
| ENST00000442760 | TPT1     | 9.90 | 8.8244E-03 |
| ENST00000396757 | CD72     | 9.89 | 4.0828E-02 |
| ENST00000481432 | NAA50    | 9.89 | 4.0828E-02 |
| ENST00000568449 | EME2     | 9.89 | 4.0828E-02 |
| ENST00000229270 | HEL-S-49 | 9.89 | 2.6254E-02 |
| ENST00000326739 | IMPDH2   | 9.89 | 1.9923E-02 |
| ENST00000635172 | Sep      | 9.89 | 2.7376E-02 |
| ENST00000672422 | EFCAB14  | 9.88 | 1.4667E-02 |
| ENST00000425807 | COMP     | 9.88 | 4.1063E-02 |
| ENST00000470239 | TFB1M    | 9.88 | 4.1063E-02 |
| ENST00000540584 | CAPRIN2  | 9.88 | 4.1063E-02 |
| ENST00000577796 | RAB31    | 9.88 | 4.1063E-02 |
| ENST00000599701 | FCGRT    | 9.88 | 4.1063E-02 |
| ENST00000428990 | RPL23AP1 | 9.88 | 4.1063E-02 |
| ENST00000433438 | RPL23AP1 | 9.88 | 4.1063E-02 |
| ENST00000430582 | RPL23AP1 | 9.88 | 4.1063E-02 |
| ENST00000446846 | RPL23AP1 | 9.88 | 4.1063E-02 |
| ENST00000417214 | RPL23AP1 | 9.88 | 4.1063E-02 |
| ENST00000429422 | MAP4     | 9.87 | 4.3793E-02 |
| ENST00000455106 | FKBP10   | 9.87 | 4.3793E-02 |
| ENST00000493678 | PARK7    | 9.87 | 4.3793E-02 |
| ENST00000523872 | PIK3R1   | 9.87 | 4.3793E-02 |
| ENST00000580234 | BRD2     | 9.87 | 2.8016E-02 |
| ENST00000518611 | BNIP3L   | 9.87 | 2.2561E-02 |
| ENST00000553408 | ATP6V1D  | 9.86 | 2.5257E-02 |

|                 |              |      |            |
|-----------------|--------------|------|------------|
| ENST00000622254 | MAPK1IP1L    | 9.86 | 2.5486E-02 |
| ENST00000473842 | CWF19L1      | 9.86 | 4.1357E-02 |
| ENST00000477484 | SECISBP2     | 9.86 | 4.1357E-02 |
| ENST00000483659 | CAPG         | 9.86 | 4.1357E-02 |
| ENST00000529187 | TLCD5        | 9.86 | 4.1357E-02 |
| ENST00000548870 | SLC38A2      | 9.86 | 4.1357E-02 |
| ENST00000551070 | KRR1         | 9.86 | 4.1357E-02 |
| ENST00000639141 | ZNF271P      | 9.85 | 1.0849E-02 |
| ENST00000236273 | SYF2         | 9.85 | 4.3529E-03 |
| ENST00000296444 | SHISA5       | 9.85 | 2.8097E-02 |
| ENST00000619757 | HIC1         | 9.84 | 2.8147E-02 |
| ENST00000334884 | KMT2E        | 9.84 | 4.1678E-02 |
| ENST00000281243 | QDPR         | 9.84 | 4.1678E-02 |
| ENST00000342753 | MXRA8        | 9.84 | 4.1678E-02 |
| ENST00000394908 | FLOT2        | 9.84 | 4.1678E-02 |
| ENST00000498022 | NAGK         | 9.84 | 4.1678E-02 |
| ENST00000582438 | CYBC1        | 9.84 | 4.1678E-02 |
| ENST00000470295 | PPP1R35      | 9.84 | 4.1678E-02 |
| ENST00000551946 | None         | 9.84 | 4.1678E-02 |
| ENST00000424877 | KMT2C        | 9.83 | 4.4443E-02 |
| ENST00000529464 | FDFT1        | 9.83 | 4.4443E-02 |
| ENST00000369387 | H3P6         | 9.83 | 1.8984E-02 |
| ENST00000437078 | None         | 9.83 | 4.1936E-02 |
| ENST00000479250 | EIF2B5       | 9.83 | 4.1936E-02 |
| ENST00000545033 | OGFOD2       | 9.83 | 4.1936E-02 |
| ENST00000564456 | ZNF668       | 9.83 | 4.1936E-02 |
| ENST00000643241 | DNAJC19      | 9.83 | 4.1936E-02 |
| ENST00000537590 | SLC39A1      | 9.83 | 4.1936E-02 |
| ENST00000601636 | SMIM7        | 9.83 | 4.1936E-02 |
| ENST00000451736 | None         | 9.83 | 4.1936E-02 |
| ENST00000650688 | DKFZp762B153 | 9.82 | 2.8492E-02 |
| ENST00000405123 | ERLEC1       | 9.81 | 2.6309E-02 |
| ENST00000248553 | HEL-S-102    | 9.81 | 1.7494E-02 |
| ENST00000258530 | APPL2        | 9.81 | 4.2342E-02 |
| ENST00000539759 | MTCH2        | 9.81 | 4.2342E-02 |
| ENST00000646923 | MTCH2        | 9.81 | 4.2342E-02 |
| ENST00000409077 | MORN2        | 9.81 | 4.2342E-02 |
| ENST00000478890 | SRRM1        | 9.81 | 4.2342E-02 |
| ENST00000424032 | ZNF880       | 9.81 | 4.2342E-02 |
| ENST00000394650 | MCUB         | 9.81 | 2.8953E-02 |
| ENST00000483063 | POLE4        | 9.80 | 2.1517E-03 |
| ENST00000509724 | SPAG9        | 9.80 | 2.8926E-02 |
| ENST00000392185 | SNX9         | 9.80 | 3.2380E-03 |
| ENST00000553191 | CNPY2        | 9.80 | 4.5227E-02 |
| ENST00000531921 | EIF3M        | 9.79 | 4.2667E-02 |

|                 |          |      |            |
|-----------------|----------|------|------------|
| ENST00000432483 | PPA2     | 9.79 | 4.2667E-02 |
| ENST00000436439 | HMGCL    | 9.79 | 4.2667E-02 |
| ENST00000521328 | YWHAZ    | 9.79 | 4.2667E-02 |
| ENST00000525045 | PABPC4   | 9.79 | 4.2667E-02 |
| ENST00000546199 | SPX      | 9.79 | 4.2667E-02 |
| ENST00000391791 | PPP2R1A  | 9.79 | 2.0637E-02 |
| ENST00000374379 | CLIC4    | 9.79 | 1.2218E-02 |
| ENST00000634597 | SPATA20  | 9.79 | 3.2304E-02 |
| ENST00000367569 | SF3B5    | 9.78 | 1.7414E-03 |
| ENST00000528095 | RSF1     | 9.78 | 8.1214E-03 |
| ENST00000395183 | ARHGAP24 | 9.78 | 4.3011E-02 |
| ENST00000488494 | ITGB1    | 9.78 | 4.3011E-02 |
| ENST00000507722 | ZBTB38   | 9.78 | 4.3011E-02 |
| ENST00000515697 | FAM200B  | 9.78 | 4.3011E-02 |
| ENST00000602679 | DMKN     | 9.78 | 4.3011E-02 |
| ENST00000648640 | RPL29    | 9.78 | 4.3011E-02 |
| ENST00000579456 | CLTC     | 9.78 | 2.9396E-02 |
| ENST00000372656 | TCEAL9   | 9.78 | 3.1907E-02 |
| ENST00000342312 | ADSL     | 9.76 | 2.7348E-02 |
| ENST00000550407 | TARBP2   | 9.76 | 1.6047E-02 |
| ENST00000449692 | C11orf68 | 9.76 | 4.3392E-02 |
| ENST00000518936 | PCM1     | 9.76 | 4.3392E-02 |
| ENST00000537289 | COA4     | 9.76 | 4.3392E-02 |
| ENST00000618074 | None     | 9.76 | 4.3392E-02 |
| ENST00000409957 | PREPL    | 9.76 | 4.6152E-02 |
| ENST00000427040 | DPH5     | 9.76 | 4.6152E-02 |
| ENST00000618169 | None     | 9.76 | 2.9409E-02 |
| ENST00000568871 | FAM214A  | 9.75 | 1.6403E-02 |
| ENST00000382456 | AP2M1    | 9.75 | 2.9403E-02 |
| ENST00000479806 | DYNC1I2  | 9.75 | 2.9409E-02 |
| ENST00000341249 | METTL23  | 9.74 | 4.3793E-02 |
| ENST00000394826 | NSRP1    | 9.74 | 4.3793E-02 |
| ENST00000489758 | CLIC4    | 9.74 | 4.3793E-02 |
| ENST00000568704 | CYLD     | 9.74 | 3.2396E-02 |
| ENST00000426086 | VEGFB    | 9.73 | 5.8448E-03 |
| ENST00000331314 | DDX59    | 9.73 | 4.4128E-02 |
| ENST00000466951 | PSMB7    | 9.73 | 4.4128E-02 |
| ENST00000510372 | SNX2     | 9.73 | 4.4128E-02 |
| ENST00000523095 | ZNF395   | 9.73 | 4.4128E-02 |
| ENST00000524114 | PINX1    | 9.73 | 4.4128E-02 |
| ENST00000527348 | BANF1    | 9.73 | 4.4128E-02 |
| ENST00000537016 | TRMT10B  | 9.73 | 4.4128E-02 |
| ENST00000559113 | ANXA2    | 9.73 | 4.4128E-02 |
| ENST00000550201 | DCTN2    | 9.72 | 3.2686E-02 |
| ENST00000531115 | FIBP     | 9.72 | 4.6954E-02 |

|                 |           |      |            |
|-----------------|-----------|------|------------|
| ENST00000400090 | ATP5PF    | 9.72 | 2.9300E-02 |
| ENST00000356537 | CCDC25    | 9.71 | 4.4443E-02 |
| ENST00000415680 | TRIM24    | 9.71 | 4.4443E-02 |
| ENST00000453466 | PMPCB     | 9.71 | 4.4443E-02 |
| ENST00000613856 | SLIRP     | 9.71 | 4.4443E-02 |
| ENST00000616539 | NKD2      | 9.70 | 3.0197E-02 |
| ENST00000290902 | SPON2     | 9.70 | 3.1849E-02 |
| ENST00000262225 | TMED2     | 9.70 | 1.7163E-02 |
| ENST00000443816 | FN1       | 9.70 | 2.0537E-02 |
| ENST00000409321 | PTMA      | 9.69 | 2.0272E-02 |
| ENST00000253110 | SHFL      | 9.69 | 3.3085E-02 |
| ENST00000622695 | LINC00869 | 9.69 | 4.4773E-02 |
| ENST00000343524 | ATG4A     | 9.69 | 4.4773E-02 |
| ENST00000414866 | DMKN      | 9.69 | 4.4773E-02 |
| ENST00000450796 | NFU1      | 9.69 | 4.4773E-02 |
| ENST00000457805 | PTP4A2    | 9.69 | 4.4773E-02 |
| ENST00000559706 | GTF2A2    | 9.69 | 4.4773E-02 |
| ENST00000566416 | VAC14     | 9.69 | 4.4773E-02 |
| ENST00000574447 | HSD3B7    | 9.69 | 4.4773E-02 |
| ENST00000460638 | EIF3L     | 9.69 | 9.5788E-03 |
| ENST00000551475 | CNPY2     | 9.68 | 4.7812E-02 |
| ENST00000354216 | UCKL1     | 9.68 | 4.7812E-02 |
| ENST00000477649 | VMA21     | 9.68 | 4.7812E-02 |
| ENST00000527950 | CRYAB     | 9.68 | 2.9642E-02 |
| ENST00000461065 | AGAP3     | 9.68 | 2.9580E-02 |
| ENST00000248450 | AAMP      | 9.68 | 3.6203E-02 |
| ENST00000383589 | USP14     | 9.67 | 4.5227E-02 |
| ENST00000392597 | PTPN11    | 9.67 | 4.5227E-02 |
| ENST00000526507 | FEZ1      | 9.67 | 4.5227E-02 |
| ENST00000565726 | ZDHC1     | 9.67 | 4.5227E-02 |
| ENST00000591161 | NANOS3    | 9.67 | 4.5227E-02 |
| ENST00000671888 | NANOS3    | 9.67 | 4.5227E-02 |
| ENST00000361731 | SFT2D1    | 9.67 | 3.0708E-02 |
| ENST00000370626 | AVPI1     | 9.66 | 7.8301E-03 |
| ENST00000537569 | TAOK3     | 9.66 | 3.0821E-02 |
| ENST00000336180 | LIMK1     | 9.66 | 1.5393E-02 |
| ENST00000281172 | EPS8      | 9.65 | 4.5745E-02 |
| ENST00000368409 | EFNA4     | 9.65 | 4.5745E-02 |
| ENST00000406711 | CEBPZOS   | 9.65 | 4.5745E-02 |
| ENST00000541360 | OGFOD2    | 9.65 | 4.5745E-02 |
| ENST00000593892 | SELENOW   | 9.65 | 4.5745E-02 |
| ENST00000393250 | OSBPL8    | 9.65 | 3.0668E-02 |
| ENST00000263384 | FAM32A    | 9.65 | 1.5879E-02 |
| ENST00000548925 | BLOC1S1   | 9.65 | 3.1931E-02 |
| ENST00000344366 | CA12      | 9.64 | 4.8582E-02 |



|                 |            |      |            |
|-----------------|------------|------|------------|
| ENST00000558278 | HOMEZ      | 9.64 | 3.3955E-02 |
| ENST00000537505 | RABEP1     | 9.64 | 3.0864E-02 |
| ENST00000397713 | AMZ2P1     | 9.64 | 3.4032E-02 |
| ENST00000649266 | ITM2B      | 9.64 | 4.6152E-02 |
| ENST00000462511 | TECPR1     | 9.64 | 4.6152E-02 |
| ENST00000486645 | CMC2       | 9.64 | 4.6152E-02 |
| ENST00000575556 | PSMB10     | 9.64 | 4.6152E-02 |
| ENST00000599519 | PEX11G     | 9.64 | 4.6152E-02 |
| ENST00000646312 | GPI        | 9.64 | 4.6152E-02 |
| ENST00000476133 | S100A13    | 9.64 | 1.4924E-02 |
| ENST00000258526 | PLXNC1     | 9.63 | 1.7601E-02 |
| ENST00000347770 | AZIN1      | 9.63 | 3.0321E-02 |
| ENST00000337231 | CDR2L      | 9.63 | 3.0319E-02 |
| ENST00000444891 | HLA-F      | 9.62 | 2.9543E-02 |
| ENST00000341491 | ATF3       | 9.62 | 4.6603E-02 |
| ENST00000375533 | BAMBI      | 9.62 | 4.6603E-02 |
| ENST00000537952 | TAOK3      | 9.62 | 4.6603E-02 |
| ENST00000614349 | None       | 9.62 | 4.6603E-02 |
| ENST00000495837 | RPL29P14   | 9.62 | 4.6603E-02 |
| ENST00000299705 | TMED3      | 9.62 | 4.6603E-02 |
| ENST00000453788 | HSPA8      | 9.62 | 3.3873E-02 |
| ENST00000556605 | SLC39A9    | 9.61 | 1.9510E-02 |
| ENST00000663135 | CALM1      | 9.61 | 6.9440E-03 |
| ENST00000402752 | RANBP1     | 9.61 | 3.1439E-02 |
| ENST00000347934 | WAC        | 9.60 | 4.9506E-02 |
| ENST00000422974 | ZFP91-CNTF | 9.60 | 4.9506E-02 |
| ENST00000491976 | SERINC2    | 9.60 | 6.2060E-03 |
| ENST00000451583 | NBDY       | 9.60 | 4.6988E-02 |
| ENST00000503610 | GOLPH3     | 9.60 | 4.6988E-02 |
| ENST00000641023 | PHGDH      | 9.60 | 4.6988E-02 |
| ENST00000645471 | TPM4       | 9.60 | 4.6988E-02 |
| ENST00000518050 | CLU        | 9.60 | 3.1651E-02 |
| ENST00000265087 | STC2       | 9.59 | 3.0944E-03 |
| ENST00000367478 | TPR        | 9.59 | 3.2686E-02 |
| ENST00000536711 | MED21      | 9.59 | 2.7744E-02 |
| ENST00000530472 | PDE4DIP    | 9.58 | 3.0852E-02 |
| ENST00000253047 | TMEM160    | 9.58 | 3.0918E-02 |
| ENST00000295633 | FSTL1      | 9.58 | 4.7820E-03 |
| ENST00000266987 | TARBP2     | 9.58 | 4.7419E-02 |
| ENST00000415537 | HLA-C      | 9.58 | 4.7419E-02 |
| ENST00000524537 | NAGK       | 9.58 | 4.7419E-02 |
| ENST00000528385 | L3MBTL3    | 9.58 | 4.7419E-02 |
| ENST00000544741 | None       | 9.58 | 4.7419E-02 |
| ENST00000367334 | TMEM9      | 9.58 | 4.7419E-02 |
| ENST00000610709 | None       | 9.57 | 1.8074E-02 |

|                 |           |      |            |
|-----------------|-----------|------|------------|
| ENST00000530004 | TTC39A    | 9.57 | 3.1830E-02 |
| ENST00000467531 | RPS10     | 9.57 | 1.1333E-02 |
| ENST00000273920 | ENOPH1    | 9.56 | 4.7879E-02 |
| ENST00000464468 | GET4      | 9.56 | 4.7879E-02 |
| ENST00000560816 | ETFA      | 9.56 | 4.7879E-02 |
| ENST00000570856 | GABARAP   | 9.56 | 4.7879E-02 |
| ENST00000383794 | CCDC174   | 9.56 | 3.1165E-02 |
| ENST00000371730 | EPS15     | 9.55 | 1.9162E-02 |
| ENST00000324096 | MAP1S     | 9.55 | 3.1233E-02 |
| ENST00000488803 | RPS2P5    | 9.55 | 2.4016E-02 |
| ENST00000646664 | PS1TP5BP1 | 9.55 | 2.5863E-03 |
| ENST00000618010 | RAB4A     | 9.55 | 3.5865E-02 |
| ENST00000518829 | CIBAR1    | 9.54 | 4.8185E-02 |
| ENST00000352886 | SHMT1     | 9.54 | 4.8185E-02 |
| ENST00000472328 | IMPDH2    | 9.54 | 4.8185E-02 |
| ENST00000526883 | SPCS2     | 9.54 | 4.8185E-02 |
| ENST00000531601 | SCYL1     | 9.54 | 4.8185E-02 |
| ENST00000549596 | NAP1L1    | 9.54 | 4.8185E-02 |
| ENST00000558462 | ZNF839    | 9.54 | 4.8185E-02 |
| ENST00000437004 | PPP1R12A  | 9.54 | 4.8185E-02 |
| ENST00000531943 | ZNF143    | 9.54 | 4.8185E-02 |
| ENST00000561251 | ZNF839    | 9.54 | 4.8185E-02 |
| ENST00000451270 | ANXA2     | 9.54 | 6.9348E-03 |
| ENST00000557589 | TIMELESS  | 9.53 | 3.5683E-02 |
| ENST00000263202 | ufd1      | 9.53 | 1.6781E-02 |
| ENST00000381401 | SLC25A6   | 9.53 | 3.6395E-03 |
| ENST00000222266 | PSENEN    | 9.52 | 2.2313E-02 |
| ENST00000427183 | HDLBP     | 9.52 | 1.5671E-02 |
| ENST00000328392 | SKP1      | 9.52 | 3.3085E-02 |
| ENST00000528164 | NDUFC2    | 9.52 | 3.1738E-02 |
| ENST00000292330 | PPP1R35   | 9.52 | 4.8684E-02 |
| ENST00000393150 | CASP4     | 9.52 | 4.8684E-02 |
| ENST00000439980 | PIN4      | 9.52 | 4.8684E-02 |
| ENST00000470095 | HPS1      | 9.52 | 4.8684E-02 |
| ENST00000596873 | RPS11     | 9.52 | 4.8684E-02 |
| ENST00000489852 | SDHAF3    | 9.52 | 4.8684E-02 |
| ENST00000216442 | ATP6V1D   | 9.52 | 1.9475E-02 |
| ENST00000395938 | PMP22     | 9.52 | 3.1774E-02 |
| ENST00000279387 | PPP4C     | 9.52 | 3.7711E-02 |
| ENST00000439383 | PSMD2     | 9.51 | 1.8396E-02 |
| ENST00000634374 | EFEMP1    | 9.51 | 2.3701E-02 |
| ENST00000437418 | FAM210B   | 9.51 | 3.2686E-02 |
| ENST00000519872 | ERLIN2    | 9.51 | 3.3590E-02 |
| ENST00000465122 | PDCD6IP   | 9.51 | 3.2877E-02 |
| ENST00000539539 | CCAR1     | 9.51 | 2.8926E-02 |

|                 |               |      |            |
|-----------------|---------------|------|------------|
| ENST00000646101 | ARPC1B        | 9.51 | 3.7988E-03 |
| ENST00000481997 | ARPC1B        | 9.51 | 2.8458E-03 |
| ENST00000530054 | NDUFC2-KCTD14 | 9.50 | 3.3027E-02 |
| ENST00000597274 | NAPA          | 9.50 | 4.9142E-02 |
| ENST00000620199 | TMEM191B      | 9.50 | 4.9142E-02 |
| ENST00000652401 | TYMP          | 9.50 | 4.9142E-02 |
| ENST00000535425 | SCO2          | 9.50 | 4.9142E-02 |
| ENST00000564661 | METRN         | 9.50 | 3.3117E-02 |
| ENST00000479630 | MAP3K7        | 9.49 | 3.6758E-02 |
| ENST00000524606 | PSMA1         | 9.49 | 3.6067E-02 |
| ENST00000268607 | MAP1LC3B      | 9.49 | 3.8447E-02 |
| ENST00000310837 | EIF1          | 9.48 | 1.7115E-02 |
| ENST00000318190 | TPRKB         | 9.48 | 4.9525E-02 |
| ENST00000417312 | BNIP2         | 9.48 | 4.9525E-02 |
| ENST00000533642 | IMMP1L        | 9.48 | 4.9525E-02 |
| ENST00000562523 | NIP7          | 9.48 | 4.9525E-02 |
| ENST00000580090 | CENPX         | 9.48 | 4.9525E-02 |
| ENST00000635047 | SEPTIN7       | 9.48 | 4.9525E-02 |
| ENST00000204566 | SPG21         | 9.48 | 4.9525E-02 |
| ENST00000588354 | ZNF585A       | 9.48 | 3.6676E-02 |
| ENST00000272102 | ARF1          | 9.47 | 4.1792E-03 |
| ENST00000470422 | RRBP1         | 9.47 | 3.3590E-02 |
| ENST00000503026 | CCT5          | 9.47 | 3.1571E-02 |
| ENST00000470336 | ABI3BP        | 9.47 | 2.0819E-02 |
| ENST00000463851 | GLUL          | 9.47 | 3.2838E-02 |
| ENST00000379863 | NRBP1         | 9.46 | 3.7341E-02 |
| ENST00000482560 | KMT2E         | 9.46 | 3.3324E-02 |
| ENST00000315717 | ARPC2         | 9.46 | 2.8453E-03 |
| ENST00000376946 | DNAJC1        | 9.46 | 4.9960E-02 |
| ENST00000452171 | ACAA1         | 9.46 | 4.9960E-02 |
| ENST00000459834 | PSPH          | 9.46 | 4.9960E-02 |
| ENST00000475893 | TBRG4         | 9.46 | 4.9960E-02 |
| ENST00000486134 | PLD3          | 9.46 | 4.9960E-02 |
| ENST00000520535 | ZNF395        | 9.46 | 4.9960E-02 |
| ENST00000533571 | MTCH2         | 9.46 | 4.9960E-02 |
| ENST00000636293 | UROD          | 9.46 | 4.9960E-02 |
| ENST00000643386 | None          | 9.46 | 4.9960E-02 |
| ENST00000338008 | ZFYVE16       | 9.46 | 4.9960E-02 |
| ENST00000620338 | ACD           | 9.46 | 3.3590E-02 |
| ENST00000484253 | BIN1          | 9.45 | 3.7442E-02 |
| ENST00000402886 | TEAD3         | 9.45 | 3.5812E-02 |
| ENST00000582401 | TXNIP         | 9.45 | 1.8273E-02 |
| ENST00000272748 | LNPK          | 9.44 | 2.3798E-02 |
| ENST00000552297 | MYL6          | 9.44 | 3.4120E-02 |
| ENST00000394030 | CBLB          | 9.44 | 3.7752E-02 |

|                 |          |      |            |
|-----------------|----------|------|------------|
| ENST00000335181 | PKM      | 9.43 | 3.1112E-03 |
| ENST00000303204 | PRELID1  | 9.43 | 3.5976E-02 |
| ENST00000435275 | RPS24    | 9.42 | 2.5332E-02 |
| ENST00000554366 | COX16    | 9.42 | 3.2589E-02 |
| ENST00000529725 | SIPA1    | 9.42 | 3.5359E-02 |
| ENST00000267328 | RAB20    | 9.41 | 3.6859E-02 |
| ENST00000455009 | ARPC1B   | 9.41 | 3.9622E-02 |
| ENST00000541722 | GLRB     | 9.40 | 3.4552E-02 |
| ENST00000586925 | FXYD5    | 9.40 | 1.7517E-02 |
| ENST00000367843 | DCAF6    | 9.38 | 3.8783E-02 |
| ENST00000327374 | TANGO2   | 9.38 | 3.3955E-02 |
| ENST00000477994 | CUEDC2   | 9.38 | 3.6032E-02 |
| ENST00000592940 | GPX4     | 9.38 | 3.0877E-02 |
| ENST00000257663 | TMEM60   | 9.37 | 3.4019E-02 |
| ENST00000397113 | FGFR1    | 9.37 | 3.4059E-02 |
| ENST00000548022 | ZCRB1    | 9.37 | 1.2587E-02 |
| ENST00000260443 | C15orf15 | 9.36 | 2.3006E-02 |
| ENST00000599310 | SMIM7    | 9.36 | 3.5152E-02 |
| ENST00000392710 | PRKAR1A  | 9.36 | 4.1646E-02 |
| ENST00000359755 | AKAP12   | 9.35 | 3.6371E-02 |
| ENST00000250489 | PIP4P1   | 9.35 | 8.0639E-03 |
| ENST00000370982 | GNG12    | 9.35 | 2.7047E-03 |
| ENST00000610189 | GPN1     | 9.35 | 3.5645E-02 |
| ENST00000323666 | METAP2   | 9.34 | 3.4946E-02 |
| ENST00000478050 | SF3B6    | 9.34 | 3.5754E-02 |
| ENST00000584056 | RPL23    | 9.34 | 3.0263E-02 |
| ENST00000343150 | CTSL     | 9.33 | 1.5451E-02 |
| ENST00000375400 | SVIL     | 9.33 | 1.6989E-02 |
| ENST00000336057 | HDAC5    | 9.32 | 3.4986E-02 |
| ENST00000654051 | None     | 9.32 | 3.5929E-02 |
| ENST00000265462 | PRDX5    | 9.32 | 1.2252E-02 |
| ENST00000616058 | SUCO     | 9.32 | 3.6068E-02 |
| ENST00000548547 | IGFBP6   | 9.32 | 1.3761E-02 |
| ENST00000441080 | PFDN4    | 9.30 | 2.3565E-02 |
| ENST00000419016 | CHMP5    | 9.30 | 3.5638E-02 |
| ENST00000419938 | ZEB2     | 9.30 | 1.5265E-02 |
| ENST00000376112 | ID1      | 9.30 | 3.9970E-02 |
| ENST00000522433 | KHDRBS3  | 9.29 | 3.6676E-02 |
| ENST00000514924 | HEL-117  | 9.29 | 3.6859E-02 |
| ENST00000657090 | GNAS     | 9.29 | 1.7101E-02 |
| ENST00000309032 | BAD      | 9.29 | 4.0219E-02 |
| ENST00000244520 | SNRPC    | 9.29 | 2.3482E-02 |
| ENST00000418310 | LIMK1    | 9.28 | 3.7754E-02 |
| ENST00000460284 | XRCC5    | 9.28 | 3.8917E-02 |
| ENST00000396705 | TPI1     | 9.28 | 4.3686E-03 |

|                 |          |      |            |
|-----------------|----------|------|------------|
| ENST00000585132 | NCOA4    | 9.28 | 2.3121E-02 |
| ENST00000369603 | SMNDC1   | 9.27 | 9.1793E-03 |
| ENST00000253814 | NDFIP1   | 9.26 | 2.4221E-02 |
| ENST00000617516 | DUSP14   | 9.26 | 1.4353E-02 |
| ENST00000409716 | TPRKB    | 9.26 | 2.1912E-02 |
| ENST00000396194 | GEM      | 9.25 | 2.1502E-02 |
| ENST00000252603 | PGLS     | 9.25 | 3.6372E-02 |
| ENST00000328089 | SPSB1    | 9.25 | 2.2272E-02 |
| ENST00000328965 | OAF      | 9.24 | 2.3434E-02 |
| ENST00000463214 | RBSN     | 9.24 | 3.7560E-02 |
| ENST00000521641 | CIBAR1   | 9.24 | 3.7560E-02 |
| ENST00000265062 | RAB7A    | 9.24 | 2.3482E-02 |
| ENST00000561428 | KIAA0256 | 9.23 | 3.6054E-02 |
| ENST00000459785 | CASTOR1  | 9.23 | 3.8790E-02 |
| ENST00000552783 | LIMA1    | 9.23 | 3.9304E-02 |
| ENST00000394580 | RPL36    | 9.23 | 1.4700E-02 |
| ENST00000438270 | CYB5R3   | 9.22 | 3.8059E-02 |
| ENST00000525212 | NDUFS3   | 9.22 | 2.8800E-02 |
| ENST00000644568 | None     | 9.22 | 2.8800E-02 |
| ENST00000422708 | DARS1    | 9.22 | 3.7282E-02 |
| ENST00000265729 | SRI      | 9.22 | 2.9409E-02 |
| ENST00000319006 | TALDO1   | 9.21 | 1.3293E-02 |
| ENST00000546651 | C12orf76 | 9.20 | 3.8159E-02 |
| ENST00000460192 | PARK7    | 9.20 | 3.9418E-02 |
| ENST00000468249 | ODF3B    | 9.20 | 2.9234E-02 |
| ENST00000433482 | DAXX     | 9.19 | 3.7352E-02 |
| ENST00000253778 | GFPT2    | 9.19 | 3.7752E-02 |
| ENST00000558562 | TMED3    | 9.18 | 2.3581E-02 |
| ENST00000329138 | HGS      | 9.18 | 3.7631E-02 |
| ENST00000427980 | ATXN1L   | 9.18 | 2.7313E-02 |
| ENST00000303251 | RAB24    | 9.18 | 2.2468E-02 |
| ENST00000474342 | SLTM     | 9.18 | 3.0796E-02 |
| ENST00000591919 | UBXN6    | 9.17 | 3.1916E-02 |
| ENST00000569545 | ALDOA    | 9.17 | 4.0415E-02 |
| ENST00000517391 | CPNE3    | 9.17 | 3.9970E-02 |
| ENST00000567983 | DCTPP1   | 9.16 | 4.3011E-02 |
| ENST00000444129 | RECQL    | 9.16 | 3.0042E-02 |
| ENST00000469568 | MIEN1    | 9.16 | 3.8059E-02 |
| ENST00000592764 | RNMT     | 9.15 | 4.2464E-02 |
| ENST00000358460 | FAM104B  | 9.14 | 4.2862E-02 |
| ENST00000370322 | NDUFB8   | 9.14 | 1.4522E-02 |
| ENST00000377575 | HMGN4    | 9.14 | 3.9622E-02 |
| ENST00000228938 | MGP      | 9.14 | 4.3320E-02 |
| ENST00000320334 | OLFML3   | 9.14 | 4.8340E-02 |
| ENST00000467792 | PSMD1    | 9.13 | 1.5799E-02 |

|                 |          |      |            |
|-----------------|----------|------|------------|
| ENST00000376630 | HLA-E    | 9.13 | 1.4916E-02 |
| ENST00000596358 | NOSIP    | 9.13 | 2.4829E-02 |
| ENST00000495146 | RAB10    | 9.12 | 2.6251E-02 |
| ENST00000638207 | FLII     | 9.12 | 4.0960E-02 |
| ENST00000327031 | FLII     | 9.12 | 4.0960E-02 |
| ENST00000253193 | LRP3     | 9.12 | 3.8760E-02 |
| ENST00000532829 | FTH1     | 9.12 | 3.0929E-02 |
| ENST00000479067 | MIER1    | 9.11 | 4.3872E-02 |
| ENST00000667629 | EGLN1    | 9.11 | 4.3392E-02 |
| ENST00000429120 | LY6E     | 9.10 | 4.1063E-02 |
| ENST00000632424 | None     | 9.10 | 4.1063E-02 |
| ENST00000427521 | MEST     | 9.10 | 2.5750E-02 |
| ENST00000566906 | MAZ      | 9.10 | 4.0960E-02 |
| ENST00000371897 | SLC2A6   | 9.09 | 4.0219E-02 |
| ENST00000625425 | None     | 9.09 | 4.0219E-02 |
| ENST00000517625 | SKP1     | 9.09 | 3.9417E-02 |
| ENST00000619818 | CWC25    | 9.09 | 3.9754E-02 |
| ENST00000633741 | None     | 9.09 | 3.9754E-02 |
| ENST00000411938 | LSM8     | 9.08 | 3.4391E-02 |
| ENST00000356415 | RAP1A    | 9.08 | 2.1150E-02 |
| ENST00000477919 | METTL21A | 9.06 | 3.2914E-02 |
| ENST00000362012 | PTGS1    | 9.06 | 4.0219E-02 |
| ENST00000367142 | NUCKS1   | 9.05 | 7.6720E-03 |
| ENST00000650521 | None     | 9.05 | 4.1102E-02 |
| ENST00000639739 | LOX      | 9.05 | 4.5404E-02 |
| ENST00000486085 | RTN4     | 9.04 | 1.4299E-02 |
| ENST00000263864 | VAMP8    | 9.02 | 4.3070E-02 |
| ENST00000322927 | ZNF335   | 9.02 | 4.1678E-02 |
| ENST00000372634 | BEX3     | 9.02 | 2.6803E-02 |
| ENST00000263238 | ACTR3    | 9.02 | 2.8953E-02 |
| ENST00000476371 | MRPS14   | 9.02 | 4.3070E-02 |
| ENST00000268758 | PIGS     | 9.01 | 3.2589E-02 |
| ENST00000368706 | S100A16  | 9.01 | 1.6435E-02 |
| ENST00000449723 | DAZAP2   | 9.01 | 4.1063E-02 |
| ENST00000456179 | FUNDC2   | 9.01 | 1.7300E-02 |
| ENST00000284984 | ADAMTS1  | 9.00 | 2.9029E-02 |
| ENST00000447219 | CAPG     | 8.99 | 4.1611E-02 |
| ENST00000536012 | CCAR1    | 8.99 | 3.3282E-02 |
| ENST00000578386 | SMURF2   | 8.99 | 3.8059E-02 |
| ENST00000258341 | LAMC1    | 8.98 | 7.5136E-03 |
| ENST00000614837 | ATP5F1D  | 8.98 | 4.3995E-02 |
| ENST00000298316 | ARF6     | 8.98 | 2.8727E-02 |
| ENST00000532972 | SPCS2    | 8.97 | 4.1691E-02 |
| ENST00000570917 | TXNDC11  | 8.97 | 2.8585E-02 |
| ENST00000428119 | RHBDD2   | 8.97 | 4.4881E-02 |

|                 |          |      |            |
|-----------------|----------|------|------------|
| ENST00000437736 | PSMD4    | 8.96 | 4.3005E-02 |
| ENST00000299424 | TAF10    | 8.96 | 4.4527E-02 |
| ENST00000460138 | TXNDC5   | 8.95 | 4.6916E-02 |
| ENST00000330398 | ATP6V0C  | 8.95 | 4.8779E-02 |
| ENST00000534082 | CD44     | 8.95 | 4.4443E-02 |
| ENST00000372210 | UCK1     | 8.95 | 4.7849E-02 |
| ENST00000232125 | FAM162A  | 8.95 | 2.9566E-02 |
| ENST00000239223 | DUSP1    | 8.95 | 2.8090E-02 |
| ENST00000601869 | STRN4    | 8.94 | 4.4759E-02 |
| ENST00000266529 | ZCRB1    | 8.94 | 1.2093E-02 |
| ENST00000303577 | PCBP1    | 8.94 | 6.3480E-03 |
| ENST00000368413 | ADAM15   | 8.94 | 4.8118E-02 |
| ENST00000438323 | IFI35    | 8.94 | 4.3276E-02 |
| ENST00000360270 | MSN      | 8.93 | 1.2046E-02 |
| ENST00000616066 | None     | 8.93 | 1.7324E-02 |
| ENST00000264230 | NOA1     | 8.93 | 4.3774E-02 |
| ENST00000588732 | GLYR1    | 8.93 | 1.4358E-02 |
| ENST00000269321 | ARHGDI4  | 8.93 | 4.6810E-02 |
| ENST00000580793 | RFNG     | 8.92 | 4.8251E-02 |
| ENST00000506908 | HINT1    | 8.92 | 4.4128E-02 |
| ENST00000296511 | ANXA5    | 8.92 | 3.2682E-02 |
| ENST00000256496 | ARL8B    | 8.92 | 4.4204E-02 |
| ENST00000261401 | CORO1C   | 8.91 | 1.6603E-02 |
| ENST00000471897 | NCOA6    | 8.91 | 4.4204E-02 |
| ENST00000394884 | CDC23    | 8.91 | 4.2928E-02 |
| ENST00000375224 | UBR4     | 8.91 | 3.0197E-02 |
| ENST00000637937 | CTSD     | 8.91 | 3.0075E-02 |
| ENST00000236051 | EBNA1BP2 | 8.91 | 4.8893E-02 |
| ENST00000648836 | None     | 8.90 | 4.4204E-02 |
| ENST00000461539 | C9orf78  | 8.90 | 4.4443E-02 |
| ENST00000357348 | RTF2     | 8.90 | 1.2806E-02 |
| ENST00000394231 | MIEN1    | 8.90 | 4.4773E-02 |
| ENST00000553660 | CNIH1    | 8.89 | 4.4443E-02 |
| ENST00000468748 | EIF2B5   | 8.89 | 4.4488E-02 |
| ENST00000380051 | RPP40    | 8.88 | 4.4670E-02 |
| ENST00000590466 | UBXN6    | 8.88 | 3.7630E-02 |
| ENST00000351450 | PPA2     | 8.87 | 4.9309E-02 |
| ENST00000399443 | OSBPL1A  | 8.86 | 3.1301E-02 |
| ENST00000290354 | HEL-S-25 | 8.86 | 4.9309E-02 |
| ENST00000467415 | TMEM14C  | 8.86 | 3.2181E-02 |
| ENST00000646203 | None     | 8.86 | 3.2181E-02 |
| ENST00000462332 | GTPBP1   | 8.86 | 3.6201E-02 |
| ENST00000634130 | RBM8A    | 8.85 | 4.6988E-02 |
| ENST00000373358 | PBDC1    | 8.85 | 3.9436E-02 |
| ENST00000351293 | CAMK2G   | 8.84 | 4.7419E-02 |

|                 |          |      |            |
|-----------------|----------|------|------------|
| ENST00000371873 | CMPK1    | 8.84 | 6.2276E-03 |
| ENST00000632401 | None     | 8.83 | 3.7114E-02 |
| ENST00000645831 | FOXC1    | 8.83 | 2.9809E-02 |
| ENST00000296255 | RPN1     | 8.83 | 2.0674E-02 |
| ENST00000532786 | C11orf98 | 8.82 | 4.7653E-02 |
| ENST00000530876 | BSDC1    | 8.82 | 4.7653E-02 |
| ENST00000434677 | RPL3P2   | 8.82 | 4.4773E-02 |
| ENST00000436473 | RPL10    | 8.81 | 3.0946E-02 |
| ENST00000550786 | WASHC4   | 8.81 | 4.6433E-02 |
| ENST00000421093 | ZNF219   | 8.81 | 2.9118E-02 |
| ENST00000394600 | MTIF2    | 8.81 | 4.7975E-02 |
| ENST00000614345 | None     | 8.81 | 4.7975E-02 |
| ENST00000447266 | SENP6    | 8.80 | 4.6709E-02 |
| ENST00000545882 | CNN3     | 8.80 | 1.4661E-02 |
| ENST00000243040 | PFDN5    | 8.80 | 3.7754E-02 |
| ENST00000226798 | FRG1     | 8.79 | 4.8185E-02 |
| ENST00000636590 | FRG1     | 8.79 | 4.8185E-02 |
| ENST00000637998 | FRG1     | 8.79 | 4.8185E-02 |
| ENST00000371419 | PFDN4    | 8.79 | 4.8185E-02 |
| ENST00000488133 | RPL13P6  | 8.79 | 4.8185E-02 |
| ENST00000599551 | UBA52    | 8.79 | 2.1814E-02 |
| ENST00000480213 | ILF2     | 8.79 | 4.6122E-02 |
| ENST00000543117 | TAX1BP1  | 8.78 | 4.5752E-02 |
| ENST00000263754 | KAT2B    | 8.78 | 4.6472E-02 |
| ENST00000219070 | MMP2     | 8.77 | 8.2194E-03 |
| ENST00000489417 | SND1     | 8.77 | 4.6152E-02 |
| ENST00000504271 | SPATA20  | 8.77 | 3.1738E-02 |
| ENST00000621073 | MED16    | 8.77 | 4.8893E-02 |
| ENST00000564811 | COX5A    | 8.76 | 4.6858E-02 |
| ENST00000346162 | SRPK1    | 8.76 | 4.6810E-02 |
| ENST00000523094 | CLINT1   | 8.75 | 4.6916E-02 |
| ENST00000463402 | TECPR1   | 8.75 | 3.1301E-02 |
| ENST00000358377 | DCAF4    | 8.75 | 4.7879E-02 |
| ENST00000336139 | ZNF202   | 8.75 | 4.7260E-02 |
| ENST00000570308 | MMP2     | 8.75 | 1.4353E-02 |
| ENST00000649906 | SLC35B1  | 8.75 | 2.0797E-02 |
| ENST00000555944 | NSFL1C   | 8.74 | 3.1738E-02 |
| ENST00000492092 | SELENOO  | 8.74 | 4.8044E-02 |
| ENST00000646407 | CD9      | 8.74 | 4.6858E-02 |
| ENST00000401813 | FAAP20   | 8.74 | 4.9525E-02 |
| ENST00000613633 | DDX52    | 8.74 | 4.9525E-02 |
| ENST00000632030 | None     | 8.74 | 4.9525E-02 |
| ENST00000465788 | SRM      | 8.72 | 4.9868E-02 |
| ENST00000564374 | RPGRIP1L | 8.72 | 4.9868E-02 |
| ENST00000389532 | CAMSAP1  | 8.72 | 3.1170E-02 |



|                 |         |      |            |
|-----------------|---------|------|------------|
| ENST00000588674 | SBSN    | 8.71 | 4.7453E-02 |
| ENST00000611653 | GPX4    | 8.71 | 6.4508E-03 |
| ENST00000392217 | FXYD5   | 8.70 | 4.9096E-02 |
| ENST00000397604 | RNH1    | 8.70 | 1.8884E-02 |
| ENST00000632954 | None    | 8.70 | 1.8884E-02 |
| ENST00000545751 | FMN2    | 8.70 | 4.8091E-02 |
| ENST00000564314 | RBBP6   | 8.70 | 4.7728E-02 |
| ENST00000370355 | SCD     | 8.70 | 4.6255E-03 |
| ENST00000622875 | EBF1    | 8.69 | 2.1392E-02 |
| ENST00000324871 | METTL1  | 8.69 | 4.8118E-02 |
| ENST00000315731 | RPL7A   | 8.69 | 1.8593E-02 |
| ENST00000627260 | None    | 8.69 | 1.8593E-02 |
| ENST00000550671 | RPL18   | 8.69 | 4.8046E-02 |
| ENST00000440400 | ACTN4   | 8.68 | 1.9591E-02 |
| ENST00000635719 | None    | 8.68 | 1.9591E-02 |
| ENST00000308162 | CFL1    | 8.68 | 7.9805E-03 |
| ENST00000434372 | FAU     | 8.68 | 2.4596E-02 |
| ENST00000330233 | CRIP1   | 8.68 | 4.9678E-02 |
| ENST00000346916 | BSG     | 8.67 | 3.2139E-02 |
| ENST00000510098 | CAST    | 8.67 | 4.8340E-02 |
| ENST00000248114 | GFER    | 8.67 | 4.9630E-02 |
| ENST00000327435 | ADI1    | 8.67 | 1.1277E-02 |
| ENST00000461096 | TAF13   | 8.66 | 3.2056E-02 |
| ENST00000163416 | GOLGA5  | 8.66 | 4.8498E-02 |
| ENST00000546989 | RPLP0   | 8.66 | 4.0828E-02 |
| ENST00000366510 | SCCPDH  | 8.66 | 2.8802E-02 |
| ENST00000347941 | PRDX5   | 8.65 | 2.3066E-02 |
| ENST00000523636 | PABPC1  | 8.65 | 4.8693E-02 |
| ENST00000474694 | DDX18   | 8.64 | 2.2994E-02 |
| ENST00000344774 | FAM166A | 8.63 | 4.6433E-02 |
| ENST00000497142 | HYPK    | 8.63 | 4.6433E-02 |
| ENST00000522572 | VDAC3   | 8.63 | 4.6527E-02 |
| ENST00000592012 | MBD3    | 8.63 | 4.9810E-02 |
| ENST00000459859 | RPL3    | 8.63 | 4.9309E-02 |
| ENST00000395126 | RASSF1  | 8.62 | 3.2742E-02 |
| ENST00000370179 | PPDPF   | 8.62 | 1.5020E-02 |
| ENST00000518950 | MRNIP   | 8.62 | 4.2515E-02 |
| ENST00000639158 | None    | 8.62 | 4.2515E-02 |
| ENST00000594862 | SHKBP1  | 8.60 | 4.9859E-02 |
| ENST00000354171 | GPX4    | 8.59 | 2.6476E-02 |
| ENST00000490936 | FLNA    | 8.59 | 1.3413E-02 |
| ENST00000480266 | ENG     | 8.59 | 3.3297E-02 |
| ENST00000216727 | PABPN1  | 8.59 | 3.3620E-02 |
| ENST00000468830 | MKLN1   | 8.59 | 1.5122E-02 |
| ENST00000650687 | CRYAB   | 8.57 | 7.4459E-03 |

|                 |          |      |            |
|-----------------|----------|------|------------|
| ENST00000228438 | CLEC2B   | 8.57 | 2.2252E-02 |
| ENST00000237500 | MYL12B   | 8.56 | 3.4619E-02 |
| ENST00000379965 | TRIM22   | 8.56 | 3.3793E-02 |
| ENST00000536703 | GLIPR1   | 8.55 | 3.8447E-02 |
| ENST00000295748 | AZI2     | 8.55 | 4.0828E-02 |
| ENST00000233468 | SF3B6    | 8.54 | 4.1678E-02 |
| ENST00000327858 | FBLN1    | 8.54 | 3.5882E-02 |
| ENST00000471714 | ABI3BP   | 8.53 | 3.5389E-02 |
| ENST00000589599 | H3-3B    | 8.53 | 3.7571E-02 |
| ENST00000303127 | LMAN2    | 8.52 | 1.4158E-02 |
| ENST00000422424 | CIAO2B   | 8.51 | 2.7529E-02 |
| ENST00000417640 | NECAB1   | 8.51 | 3.3793E-02 |
| ENST00000451315 | NOL7     | 8.51 | 3.0981E-02 |
| ENST00000539250 | CCAR1    | 8.50 | 2.6993E-02 |
| ENST00000380752 | SLC7A1   | 8.50 | 2.1151E-02 |
| ENST00000271651 | CTSK     | 8.50 | 1.4955E-02 |
| ENST00000602569 | IFITM2   | 8.49 | 3.1038E-02 |
| ENST00000425043 | DCN      | 8.48 | 4.1102E-02 |
| ENST00000444128 | NCOA7    | 8.48 | 3.4246E-02 |
| ENST00000434693 | RBMS3    | 8.48 | 2.0578E-02 |
| ENST00000023939 | RTF2     | 8.47 | 2.3006E-02 |
| ENST00000371646 | HSP90AB1 | 8.45 | 1.1851E-02 |
| ENST00000246792 | RRAS     | 8.44 | 3.7029E-02 |
| ENST00000282007 | ZC3H13   | 8.44 | 3.9595E-02 |
| ENST00000643777 | ALDOA    | 8.44 | 3.7579E-02 |
| ENST00000457942 | CHCHD3   | 8.43 | 2.1192E-02 |
| ENST00000335895 | BTF3     | 8.42 | 3.3191E-02 |
| ENST00000402395 | SELENOM  | 8.42 | 2.6251E-02 |
| ENST00000400299 | SELENOM  | 8.42 | 2.9579E-02 |
| ENST00000508783 | RPS3A    | 8.40 | 4.2464E-02 |
| ENST00000216146 | RPL3     | 8.40 | 4.7043E-02 |
| ENST00000361813 | SMG5     | 8.39 | 2.1912E-02 |
| ENST00000595223 | KHSRP    | 8.39 | 3.1382E-02 |
| ENST00000478503 | SH3D19   | 8.38 | 3.8224E-02 |
| ENST00000354050 | PLTP     | 8.37 | 1.6670E-02 |
| ENST00000395246 | CDC42SE2 | 8.37 | 4.9142E-02 |
| ENST00000379719 | IPO7     | 8.36 | 2.9490E-02 |
| ENST00000022615 | VDAC3    | 8.35 | 3.1348E-02 |
| ENST00000614884 | DDB2     | 8.35 | 3.9890E-02 |
| ENST00000301464 | IGFBP6   | 8.34 | 1.2345E-02 |
| ENST00000200639 | LAMP2    | 8.33 | 4.1901E-02 |
| ENST00000482018 | FABP3    | 8.33 | 2.2192E-02 |
| ENST00000397386 | LMCD1    | 8.33 | 3.9436E-02 |
| ENST00000432641 | SDHAF3   | 8.32 | 3.9417E-02 |
| ENST00000570123 | COX4I1   | 8.32 | 3.1996E-02 |

|                 |          |      |            |
|-----------------|----------|------|------------|
| ENST00000497275 | FABP3    | 8.31 | 2.1814E-02 |
| ENST00000217961 | STS      | 8.29 | 2.5830E-02 |
| ENST00000396024 | ANXA2    | 8.29 | 1.8224E-02 |
| ENST00000467029 | MICOS10  | 8.28 | 3.1076E-02 |
| ENST00000344529 | PIGC     | 8.28 | 4.1063E-02 |
| ENST00000456057 | None     | 8.27 | 1.1700E-02 |
| ENST00000234111 | ODC1     | 8.27 | 3.8792E-02 |
| ENST00000544233 | WSB2     | 8.27 | 2.2359E-02 |
| ENST00000505593 | LOX      | 8.27 | 3.9436E-02 |
| ENST00000504470 | None     | 8.26 | 3.1072E-02 |
| ENST00000619951 | PSMB3    | 8.25 | 2.6301E-02 |
| ENST00000344843 | MRPL20   | 8.24 | 3.4246E-02 |
| ENST00000263239 | DDX18    | 8.23 | 1.4859E-02 |
| ENST00000389805 | SQSTM1   | 8.23 | 1.4353E-02 |
| ENST00000643389 | None     | 8.23 | 1.4353E-02 |
| ENST00000640444 | None     | 8.23 | 1.4353E-02 |
| ENST00000271843 | JTB      | 8.23 | 3.7514E-02 |
| ENST00000261313 | HEL-S-34 | 8.22 | 3.5978E-02 |
| ENST00000283131 | SMARCA5  | 8.21 | 3.1913E-02 |
| ENST00000369449 | CLIC2    | 8.20 | 4.4121E-02 |
| ENST00000492354 | SZRD1    | 8.20 | 4.1682E-02 |
| ENST00000269228 | NPC1     | 8.20 | 3.7752E-02 |
| ENST00000370223 | LZTS2    | 8.17 | 4.4741E-02 |
| ENST00000371222 | JUN      | 8.17 | 4.1711E-02 |
| ENST00000569696 | RPL4     | 8.15 | 4.3573E-02 |
| ENST00000443503 | CTDSPL   | 8.15 | 2.8893E-02 |
| ENST00000246868 | SBDS     | 8.14 | 4.7344E-02 |
| ENST00000348035 | RAC1     | 8.13 | 1.7333E-02 |
| ENST00000257770 | NT5E     | 8.12 | 4.4527E-02 |
| ENST00000279022 | MYL9     | 8.11 | 2.5334E-02 |
| ENST00000656829 | H3-3A    | 8.11 | 2.7744E-02 |
| ENST00000646926 | RMND1    | 8.10 | 4.5916E-02 |
| ENST00000566354 | VPS4A    | 8.09 | 4.4135E-02 |
| ENST00000433297 | HMGCS1   | 8.09 | 4.4204E-02 |
| ENST00000302907 | RPS9     | 8.07 | 1.9019E-02 |
| ENST00000374050 | ATP6V1G1 | 8.07 | 1.2202E-02 |
| ENST00000546788 | NDUFA12  | 8.06 | 3.2686E-02 |
| ENST00000467736 | RPL13    | 8.06 | 1.8392E-02 |
| ENST00000199448 | EPDR1    | 8.03 | 4.7395E-02 |
| ENST00000526395 | SIGIRR   | 8.03 | 3.4392E-02 |
| ENST00000267811 | TCF12    | 8.02 | 2.6122E-02 |
| ENST00000417584 | GLUL     | 8.01 | 3.8673E-02 |
| ENST00000435381 | HSPH1    | 8.01 | 3.9418E-02 |
| ENST00000215115 | BCL7C    | 7.99 | 3.6864E-02 |
| ENST00000622194 | NPRL3    | 7.99 | 4.6737E-02 |

|                 |           |      |            |
|-----------------|-----------|------|------------|
| ENST00000357037 | CAVIN1    | 7.96 | 2.1918E-02 |
| ENST00000396210 | MGST1     | 7.96 | 2.1912E-02 |
| ENST00000298295 | DEPP1     | 7.95 | 2.9792E-02 |
| ENST00000314675 | UBXN11    | 7.92 | 2.1151E-02 |
| ENST00000356861 | TNPO2     | 7.91 | 4.9525E-02 |
| ENST00000380859 | AKR1C1    | 7.90 | 4.8841E-02 |
| ENST00000402924 | BLVRA     | 7.88 | 4.8779E-02 |
| ENST00000288466 | ZNF618    | 7.87 | 2.9300E-02 |
| ENST00000548577 | RNASEK    | 7.87 | 3.3238E-02 |
| ENST00000397195 | PAFAH1B1  | 7.86 | 4.3392E-02 |
| ENST00000231061 | SPARC     | 7.85 | 3.9467E-02 |
| ENST00000498722 | LMNA      | 7.83 | 3.2181E-02 |
| ENST00000513185 | RGMB      | 7.83 | 4.9309E-02 |
| ENST00000498309 | UQCRQ     | 7.82 | 4.4773E-02 |
| ENST00000353704 | CREB3     | 7.81 | 1.6076E-02 |
| ENST00000373232 | HEL-S-66p | 7.80 | 3.9436E-02 |
| ENST00000270792 | SH3BGRL3  | 7.79 | 2.5732E-02 |
| ENST00000481029 | FBH1      | 7.78 | 4.0828E-02 |
| ENST00000527987 | SIGIRR    | 7.78 | 3.5976E-02 |
| ENST00000346473 | DDIT3     | 7.76 | 1.9742E-02 |
| ENST00000346786 | MYL9      | 7.75 | 2.8016E-02 |
| ENST00000354332 | S100A4    | 7.73 | 2.0674E-02 |
| ENST00000369817 | RPL10     | 7.72 | 2.7063E-02 |
| ENST00000568717 | PSMD7     | 7.72 | 3.5228E-02 |
| ENST00000242719 | RNF11     | 7.71 | 4.5793E-02 |
| ENST00000593054 | EIF3G     | 7.69 | 3.5978E-02 |
| ENST00000535419 | PGRMC1    | 7.67 | 2.8419E-02 |
| ENST00000468027 | PTMA      | 7.66 | 4.8185E-02 |
| ENST00000372661 | TCEAL9    | 7.66 | 3.9622E-02 |
| ENST00000324460 | HEL-S-89n | 7.65 | 2.6254E-02 |
| ENST00000427358 | FAHD1     | 7.65 | 4.0656E-02 |
| ENST00000572355 | HCFC1R1   | 7.65 | 4.3872E-02 |
| ENST00000357214 | SFPQ      | 7.63 | 3.9951E-02 |
| ENST00000533498 | RPL38     | 7.58 | 2.6000E-02 |
| ENST00000398881 | TOMM6     | 7.56 | 2.6254E-02 |
| ENST00000054666 | VAMP3     | 7.54 | 4.4204E-02 |
| ENST00000078429 | GNA11     | 7.54 | 2.3487E-02 |
| ENST00000396373 | ETV6      | 7.53 | 4.2533E-02 |
| ENST00000610579 | FURIN     | 7.53 | 4.1691E-02 |
| ENST00000394349 | ATP5MC2   | 7.53 | 2.5971E-02 |
| ENST00000251413 | TUBG1     | 7.53 | 4.9868E-02 |
| ENST00000352397 | CYB5R3    | 7.50 | 3.0263E-02 |
| ENST00000348108 | MYL6      | 7.49 | 2.9409E-02 |
| ENST00000355801 | COMMD6    | 7.48 | 4.8190E-02 |
| ENST00000300060 | ANPEP     | 7.47 | 4.0167E-02 |

|                 |         |      |            |
|-----------------|---------|------|------------|
| ENST00000344877 | ANAPC11 | 7.46 | 3.0197E-02 |
| ENST00000225964 | COL1A1  | 7.44 | 4.7344E-02 |
| ENST00000607373 | BNIP2   | 7.43 | 2.6367E-02 |
| ENST00000643776 | MEA1    | 7.41 | 4.9770E-02 |
| ENST00000355693 | CHCHD8  | 7.37 | 4.9630E-02 |
| ENST00000184266 | NDUFB4  | 7.37 | 3.0541E-02 |
| ENST00000309311 | EEF2    | 7.35 | 3.8529E-02 |
| ENST00000253452 | COX4I1  | 7.35 | 3.3096E-02 |
| ENST00000493224 | RPS27   | 7.34 | 2.3896E-02 |
| ENST00000367921 | DDR2    | 7.31 | 2.5732E-02 |
| ENST00000588061 | TNRC6C  | 7.29 | 3.8387E-02 |
| ENST00000550973 | RPL18   | 7.29 | 2.9290E-02 |
| ENST00000206423 | CCDC80  | 7.28 | 3.2450E-02 |
| ENST00000486132 | HECTD3  | 7.28 | 3.0162E-02 |
| ENST00000481009 | S100A4  | 7.26 | 3.1070E-02 |
| ENST00000271638 | S100A11 | 7.24 | 3.3162E-02 |
| ENST00000550697 | MYL6    | 7.21 | 3.1301E-02 |
| ENST00000339399 | ANP32B  | 7.20 | 3.9436E-02 |
| ENST00000426013 | MORF4L1 | 7.20 | 4.6152E-02 |
| ENST00000339647 | UBC     | 7.19 | 4.9112E-02 |
| ENST00000645147 | GPR174  | 7.18 | 4.9096E-02 |
| ENST00000552051 | HSP90B1 | 7.17 | 4.6988E-02 |
| ENST00000334828 | PGAM1   | 7.17 | 3.2040E-02 |
| ENST00000377612 | COMMD6  | 7.17 | 4.8942E-02 |
| ENST00000398174 | HM13    | 7.16 | 3.7352E-02 |
| ENST00000546939 | CD63    | 7.12 | 3.8059E-02 |
| ENST00000373586 | EIF3I   | 7.11 | 4.9398E-02 |
| ENST00000353999 | EIF4H   | 7.07 | 3.0140E-02 |
| ENST00000549920 | RPL18   | 7.05 | 3.8929E-02 |
| ENST00000317089 | DNAJA2  | 7.05 | 4.9515E-02 |
| ENST00000497035 | RPS8    | 7.05 | 4.9142E-02 |
| ENST00000498161 | FTH1P8  | 7.04 | 3.9750E-02 |
| ENST00000591160 | NDUFA11 | 6.99 | 3.7361E-02 |
| ENST00000614737 | RPS9    | 6.99 | 3.6667E-02 |
| ENST00000355968 | PPIA    | 6.99 | 3.9970E-02 |
| ENST00000301587 | ATP5PD  | 6.96 | 3.6372E-02 |
| ENST00000547649 | MYL6    | 6.91 | 3.6114E-02 |
| ENST00000648965 | MYL12B  | 6.87 | 3.8141E-02 |
| ENST00000421351 | PERP    | 6.87 | 4.2862E-02 |
| ENST00000378292 | TPM2    | 6.87 | 4.6433E-02 |
| ENST00000250263 | ERI1    | 6.85 | 4.8190E-02 |
| ENST00000566564 | MMP2    | 6.85 | 3.6519E-02 |
| ENST00000569301 | HSBP1   | 6.85 | 3.3590E-02 |
| ENST00000624069 | RPL13A  | 6.84 | 3.8077E-02 |
| ENST00000370645 | GNG5    | 6.82 | 3.8141E-02 |

|                 |          |        |            |
|-----------------|----------|--------|------------|
| ENST00000380636 | TMSB4X   | 6.74   | 4.4023E-02 |
| ENST00000409248 | C4orf48  | 6.74   | 4.9083E-02 |
| ENST00000422760 | LSM8     | 6.71   | 4.2862E-02 |
| ENST00000372692 | SET      | 6.69   | 4.3793E-02 |
| ENST00000559463 | RPL28    | 6.68   | 4.4204E-02 |
| ENST00000314133 | COX8     | 6.67   | 4.6745E-02 |
| ENST00000548898 | CD63     | 6.66   | 4.7064E-02 |
| ENST00000361899 | ATP6     | 6.64   | 3.9970E-02 |
| ENST00000610745 | CYP1B1   | 6.64   | 4.4312E-02 |
| ENST00000361739 | MT-CO2   | 6.61   | 4.9960E-02 |
| ENST00000509535 | RACK1    | 6.60   | 4.8185E-02 |
| ENST00000233813 | IGFBP5   | 6.53   | 4.7653E-02 |
| ENST00000437131 | GOLGA4   | 6.45   | 4.5227E-02 |
| ENST00000254322 | DNAJB1   | 6.34   | 4.9525E-02 |
| ENST00000548578 | BAZ2A    | -7.71  | 4.7419E-02 |
| ENST00000522356 | ZDHHC11B | -7.77  | 4.6916E-02 |
| ENST00000372371 | POLR3A   | -7.79  | 3.8792E-02 |
| ENST00000638782 | GABRG2   | -8.05  | 3.8059E-02 |
| ENST00000225831 | CCL2     | -8.07  | 4.0491E-02 |
| ENST00000641666 | OR7C1    | -8.17  | 4.9525E-02 |
| ENST00000378268 | EBPL     | -8.19  | 4.9309E-02 |
| ENST00000434571 | MR1      | -8.22  | 4.8185E-02 |
| ENST00000312037 | RPS14    | -8.33  | 4.9357E-02 |
| ENST00000632437 | NAP1L4   | -8.35  | 4.7395E-02 |
| ENST00000632134 | None     | -8.39  | 4.4128E-02 |
| ENST00000518237 | IDO1     | -8.73  | 3.6770E-02 |
| ENST00000618876 | None     | -8.76  | 3.7352E-02 |
| ENST00000438197 | SYTL2    | -10.60 | 7.9550E-03 |
| ENST00000335007 | PPP1CC   | -21.62 | 4.7576E-07 |
