# Supplementary material for: Effects of Hypoxia on RNA Cargo in Extracellular Vesicles from Human Adipose-Derived Stromal/Stem Cells
Source: MDPI journal article supplement (doi:10.3390/ijms23137384), 2022-07-02
Supplement: s1 [file s1]

## **Supplement**

**Table S1.** Primer used for PCR analyses.

| Gene           | Primer Forward                       | Primer Reverse                       | Product Length (bp) | NCBI Reference Sequence |
|----------------|--------------------------------------|--------------------------------------|---------------------|-------------------------|
| IL-10          | TAC CTG GAG GAG GTG AT               | GGC CTT GCT CTT GTT TTC<br>AC        | 148                 | NM_000572.3             |
| IL-6           | AAA GAT GGC TGA AAA<br>AGA TGG ATG C | ACA GCT CTG GCT TGT<br>TCC TCA CTA C | 150                 | NM_000600.4             |
| IDO            | GGG CTT TGC TCT GCC AAA<br>TC        | CAA CTC TTT CTC GAA GCT<br>GG C      | 116                 | NM_002164.6             |
| TNFa           | CGG GAC GTG AGC TGG<br>CCG AGG AG    | CAC CAG CTG GTT ATC TCT<br>CAG CTC   | 354                 | NM_000594.4             |
| HGF            | TTC CAT GAT ACC ACA CGA<br>ACA       | TGG ATT GCT TGT GAA ACA<br>CC        | 124                 | NM_000601.6             |
| $\beta$ -Actin | ACT GGA ACG GTG<br>AAG GGT GAC       | AGA GAA GTG GGG TGG CTT<br>TT        | 169                 | NM_001101               |
